# Supplementary material for: The genome of the Antarctic-endemic copepod, Tigriopus kingsejongensis
Source: PubMed Central journal article supplement (PMC5467011; doi:10.1093/gigascience/giw010), 2017-01-07

|                                                      |                                                                                                                                                                                                                                                                                                                                                                                                                                                                                                                                                                                                                                                                                                                                                                                                                                                                                                                                                                                                                                                                                                                                                                                                                                                                                                                                                                                                                                              |                |
|------------------------------------------------------|----------------------------------------------------------------------------------------------------------------------------------------------------------------------------------------------------------------------------------------------------------------------------------------------------------------------------------------------------------------------------------------------------------------------------------------------------------------------------------------------------------------------------------------------------------------------------------------------------------------------------------------------------------------------------------------------------------------------------------------------------------------------------------------------------------------------------------------------------------------------------------------------------------------------------------------------------------------------------------------------------------------------------------------------------------------------------------------------------------------------------------------------------------------------------------------------------------------------------------------------------------------------------------------------------------------------------------------------------------------------------------------------------------------------------------------------|----------------|
| <b>Manuscript Number:</b>                            | GIGA-D-16-00040R1                                                                                                                                                                                                                                                                                                                                                                                                                                                                                                                                                                                                                                                                                                                                                                                                                                                                                                                                                                                                                                                                                                                                                                                                                                                                                                                                                                                                                            |                |
| <b>Full Title:</b>                                   | The genome of Antarctic-endemic Copepod, <i>Tigriopus kingsejongensis</i>                                                                                                                                                                                                                                                                                                                                                                                                                                                                                                                                                                                                                                                                                                                                                                                                                                                                                                                                                                                                                                                                                                                                                                                                                                                                                                                                                                    |                |
| <b>Article Type:</b>                                 | Data Note                                                                                                                                                                                                                                                                                                                                                                                                                                                                                                                                                                                                                                                                                                                                                                                                                                                                                                                                                                                                                                                                                                                                                                                                                                                                                                                                                                                                                                    |                |
| <b>Funding Information:</b>                          | Korea Polar Research Institute (KR) (PE16070)                                                                                                                                                                                                                                                                                                                                                                                                                                                                                                                                                                                                                                                                                                                                                                                                                                                                                                                                                                                                                                                                                                                                                                                                                                                                                                                                                                                                | Dr. Hyun Park  |
|                                                      | Korea Polar Research Institute (PE14260)                                                                                                                                                                                                                                                                                                                                                                                                                                                                                                                                                                                                                                                                                                                                                                                                                                                                                                                                                                                                                                                                                                                                                                                                                                                                                                                                                                                                     | Dr Sanghee Kim |
| <b>Abstract:</b>                                     | <p>Background: The Antarctic intertidal zone is continuously subject to extreme fluctuations in biotic and abiotic stressors, and the West Antarctic Peninsula is the most rapidly warming region on earth. Organisms living in Antarctic intertidal pools are therefore of great interest for research on topics such as evolutionary adaptation to extreme environments and the effects of climate change.</p> <p>Findings: Here, we report the whole-genome sequence of the Antarctic endemic Harpacticoid copepod, <i>Tigriopus kingsejongensis</i> with a total of 37 Gb raw DNA sequence using Illumina Miseq platform and the libraries were prepared with 65-fold coverage with a total length of 295 Mb. The final assembly consists of 48,368 contigs with an N50 contig length of 17.5 kb and 27,823 scaffolds with N50 contig length of 159.2 kb and a total of 12,772 coding genes were inferred using the MAKER annotation pipeline approach. Comparative genome analysis revealed that <i>T. kingsejongensis</i> specific genes are enriched in transport and metabolism processes. Furthermore, rapidly evolving genes related to energy metabolism showed signatures of positive selection.</p> <p>Conclusions: The genome of <i>T. kingsejongensis</i> will provide an interesting example of an evolutionary strategy for Antarctic cold adaptation, and offers new genetic insights into Antarctic intertidal biota.</p> |                |
| <b>Corresponding Author:</b>                         | Hyun Park<br>KOREA, REPUBLIC OF                                                                                                                                                                                                                                                                                                                                                                                                                                                                                                                                                                                                                                                                                                                                                                                                                                                                                                                                                                                                                                                                                                                                                                                                                                                                                                                                                                                                              |                |
| <b>Corresponding Author Secondary Information:</b>   |                                                                                                                                                                                                                                                                                                                                                                                                                                                                                                                                                                                                                                                                                                                                                                                                                                                                                                                                                                                                                                                                                                                                                                                                                                                                                                                                                                                                                                              |                |
| <b>Corresponding Author's Institution:</b>           |                                                                                                                                                                                                                                                                                                                                                                                                                                                                                                                                                                                                                                                                                                                                                                                                                                                                                                                                                                                                                                                                                                                                                                                                                                                                                                                                                                                                                                              |                |
| <b>Corresponding Author's Secondary Institution:</b> |                                                                                                                                                                                                                                                                                                                                                                                                                                                                                                                                                                                                                                                                                                                                                                                                                                                                                                                                                                                                                                                                                                                                                                                                                                                                                                                                                                                                                                              |                |
| <b>First Author:</b>                                 | Seunghyun Kang                                                                                                                                                                                                                                                                                                                                                                                                                                                                                                                                                                                                                                                                                                                                                                                                                                                                                                                                                                                                                                                                                                                                                                                                                                                                                                                                                                                                                               |                |
| <b>First Author Secondary Information:</b>           |                                                                                                                                                                                                                                                                                                                                                                                                                                                                                                                                                                                                                                                                                                                                                                                                                                                                                                                                                                                                                                                                                                                                                                                                                                                                                                                                                                                                                                              |                |
| <b>Order of Authors:</b>                             | Seunghyun Kang                                                                                                                                                                                                                                                                                                                                                                                                                                                                                                                                                                                                                                                                                                                                                                                                                                                                                                                                                                                                                                                                                                                                                                                                                                                                                                                                                                                                                               |                |
|                                                      | Do-Hwan Ahn                                                                                                                                                                                                                                                                                                                                                                                                                                                                                                                                                                                                                                                                                                                                                                                                                                                                                                                                                                                                                                                                                                                                                                                                                                                                                                                                                                                                                                  |                |
|                                                      | Jun Hyuck Lee                                                                                                                                                                                                                                                                                                                                                                                                                                                                                                                                                                                                                                                                                                                                                                                                                                                                                                                                                                                                                                                                                                                                                                                                                                                                                                                                                                                                                                |                |
|                                                      | Sung Gu Lee                                                                                                                                                                                                                                                                                                                                                                                                                                                                                                                                                                                                                                                                                                                                                                                                                                                                                                                                                                                                                                                                                                                                                                                                                                                                                                                                                                                                                                  |                |
|                                                      | Seung Chul Shin                                                                                                                                                                                                                                                                                                                                                                                                                                                                                                                                                                                                                                                                                                                                                                                                                                                                                                                                                                                                                                                                                                                                                                                                                                                                                                                                                                                                                              |                |
|                                                      | Jungeun Lee                                                                                                                                                                                                                                                                                                                                                                                                                                                                                                                                                                                                                                                                                                                                                                                                                                                                                                                                                                                                                                                                                                                                                                                                                                                                                                                                                                                                                                  |                |
|                                                      | Gi-Sik Min                                                                                                                                                                                                                                                                                                                                                                                                                                                                                                                                                                                                                                                                                                                                                                                                                                                                                                                                                                                                                                                                                                                                                                                                                                                                                                                                                                                                                                   |                |
|                                                      | Hyoungseok Lee                                                                                                                                                                                                                                                                                                                                                                                                                                                                                                                                                                                                                                                                                                                                                                                                                                                                                                                                                                                                                                                                                                                                                                                                                                                                                                                                                                                                                               |                |
|                                                      | Hyun-Woo Kim                                                                                                                                                                                                                                                                                                                                                                                                                                                                                                                                                                                                                                                                                                                                                                                                                                                                                                                                                                                                                                                                                                                                                                                                                                                                                                                                                                                                                                 |                |
|                                                      | Sanghee Kim                                                                                                                                                                                                                                                                                                                                                                                                                                                                                                                                                                                                                                                                                                                                                                                                                                                                                                                                                                                                                                                                                                                                                                                                                                                                                                                                                                                                                                  |                |
|                                                      | Hyun Park                                                                                                                                                                                                                                                                                                                                                                                                                                                                                                                                                                                                                                                                                                                                                                                                                                                                                                                                                                                                                                                                                                                                                                                                                                                                                                                                                                                                                                    |                |

| Order of Authors Secondary Information: |                                                                                                                                                                                                                                                                                                                                                                                                                                                                                                                                                                                                                                                                                                                                                                                                                                                                                                                                                                                                                                                                                                                                                                                                                                                                                                                                                                                                                                                                                                                                                                                                                                                                                                                                                                                                                                                                                                                                                                                                                                                                                                                                                                                                                                                                                                                                                                                                                                                                                                                                                                                                                                                                                                                                                                                                                                                                                                                                                                                                                                                                                                                                                                                                                                                                                                                                                                                                                                                                                                                                                                                                                                                                                                                                                                                                                                                                                                                                                                                                                       |
|-----------------------------------------|-----------------------------------------------------------------------------------------------------------------------------------------------------------------------------------------------------------------------------------------------------------------------------------------------------------------------------------------------------------------------------------------------------------------------------------------------------------------------------------------------------------------------------------------------------------------------------------------------------------------------------------------------------------------------------------------------------------------------------------------------------------------------------------------------------------------------------------------------------------------------------------------------------------------------------------------------------------------------------------------------------------------------------------------------------------------------------------------------------------------------------------------------------------------------------------------------------------------------------------------------------------------------------------------------------------------------------------------------------------------------------------------------------------------------------------------------------------------------------------------------------------------------------------------------------------------------------------------------------------------------------------------------------------------------------------------------------------------------------------------------------------------------------------------------------------------------------------------------------------------------------------------------------------------------------------------------------------------------------------------------------------------------------------------------------------------------------------------------------------------------------------------------------------------------------------------------------------------------------------------------------------------------------------------------------------------------------------------------------------------------------------------------------------------------------------------------------------------------------------------------------------------------------------------------------------------------------------------------------------------------------------------------------------------------------------------------------------------------------------------------------------------------------------------------------------------------------------------------------------------------------------------------------------------------------------------------------------------------------------------------------------------------------------------------------------------------------------------------------------------------------------------------------------------------------------------------------------------------------------------------------------------------------------------------------------------------------------------------------------------------------------------------------------------------------------------------------------------------------------------------------------------------------------------------------------------------------------------------------------------------------------------------------------------------------------------------------------------------------------------------------------------------------------------------------------------------------------------------------------------------------------------------------------------------------------------------------------------------------------------------------------------------|
| Response to Reviewers:                  | <p>Subject: Your submission to GigaScience - GIGA-D-16-00040</p> <p>GIGA-D-16-00040<br/> The First Copepod Genome Reveals Evolutionary Adaptation to Extreme Environments in the Antarctic-endemic Tigriopus Seunghyun Kang; Do-Hwan Ahn; Jun Hyuck Lee; Sung Gu Lee; Seung Chul Shin; Jungeun Lee; Gi-Sik Min; Hyoungseok Lee; Hyun-Woo Kim; Sanghee Kim; Hyun Park GigaScience</p> <p>Dear Hans,<br/> We would like to thank you and all the reviewers for your kind help to revise our manuscript and consider our manuscript for publication in GigaScience. We have decided to change the article type from "Research" to "Data Note" following your precious suggestion. Accordingly, we have reduced biological analysis part (especially transcriptome response to temperature stress), focused on genome part in response to Data Note criteria and wrote down response to reviewer comments about remaining parts. As we have changed the article type, we also modified the title as follows: "The genome of Antarctic-endemic Copepod Tigriopus kingsejongensis". We appreciated all of the comments and suggestions and carefully considered all of them during the revision. All of inferred statements have been corrected, and also all of mistakes have been corrected in the revised manuscript. The corrected points were marked in yellow color in revised manuscript. We did our best to address the comments from the reviewers. Hope the revised is acceptable for publication. We look forward to hearing your decision. Thanks and best regards.<br/> Hyun Park</p> <p>Reviewer reports:<br/> Reviewer #1: The paper describes the genome of a recently described species of the harpacticoid genus Tigriopus. The species is interesting as it lives in the cold Antarctic environment. If published, it may well be the first paper describing a copepod genome; however, it should be noted that other copepod genomes are already available online, including the congener Tigriopus californicus (<a href="https://i5k.nal.usda.gov/Tigriopus_californicus">https://i5k.nal.usda.gov/Tigriopus_californicus</a>). Some reference to this and other copepod genomes (Eurytemora affinis and Salmon louse) might be appropriate.</p> <p>Response) We added publically available copepod genome data in data description part line 30.</p> <p>The abstract and background of this paper both open with what is clearly a false statement - there are not more species of copepods than insects or nematodes; there are over 1 million species of insects vs. ~12,000 species of copepods, so it's not clear what the authors are stating. Perhaps this is a language problem, but it results in a very significant error.</p> <p>Response) We made clear the sentences in abstract and data description line 21.</p> <p>Background line 24 - outdated refs for temperature adaptation. Full transcriptome response to heat stress in T. californicus was published 4 years ago (Schoville et al 2012 BMC Evolutionary Biology) and would seem to be an especially appropriate reference here as the authors could contrast response to cold with the response to heat. (also consider Barreto et al. 2011 Interpopulation patterns of divergence and selection across the transcriptome of the copepod Tigriopus californicus. Molecular Ecology. 20:560-572). It might be interesting to see if there is any overlap between genes identified as under positive selection in this species versus those identified as under selection between T. californicus populations (see Pereira et al. 2016 Molecular Ecology).</p> <p>Response) We thank the reviewer's valuable comments about transcriptome response to temperature stress. At this moment, we have changed article type from "research note" to "data note" and need to reduce biological analysis. Following your suggestions, we are going to compare not only T. japonicus but also T. californicus in our future study.</p> |

As for the genome data itself, the assembly reported is interesting as the genome size is substantially larger than that of *T. californicus* (size based on nuclear fluorescence is ~240Mb). The assembly is rather fragmented >11,000 scaffolds and I wonder if they might see significant improvement if they used a different assembler (maybe try ALLOPATHS instead of Celera - they have the necessary data)?

Response) We have used the three assemblers, Abyss, SOAP, and Celera, and all the assembly resulted in almost same genome size about 295 Mb in accordance with k-mer genome size estimation. The best statistical results were obtained from Celera and we have used Celera assembly results in the following analysis processes. We have constructed relatively long paired-end library datasets: 350bp, 400bp, 450bp, and 500bp. As far as we know, AllpathLG need at least 20 % overlapping "fragment library". Unfortunately, AllpathLG cannot be applied to our datasets.

The completeness statistic based on coverage of CEGMA is not great (82%) but they used the larger set of 458 conserved proteins rather than the more conservative set of 248 proteins often used. The authors do not report what percentage of the genes are fully (vs. partially) covered in their assembly - this might make it easier for readers to better interpret the results. I think this may be an issue if their assembly is rather incomplete in total coverage, the reported gains and losses of gene families may be unreliable. The number of annotated gene models 12,772 is a bit low (10% lower than the smaller *T. californicus* genome at ~14,100).

Response) We have modified and added complete and partial annotated gene numbers and percentages in data description line 129.

Reviewer #2:

However, I quickly became a bit perturbed. The authors claim that genomes and genomic resources are lacking for copepods, and that this is the first copepod genome paper. This is an odd statement, given that there are more genomes freely available for copepods than for any other crustacean, and a plethora of genomic resources available, relative to other non-insect arthropods. The salmon louse genome project had an official press release five years ago, and is available for analysis. In addition, two other copepod genomes, those of *Tigriopus californicus* and *Eurytemora affinis*, are freely available from the Arthropod i5K website, and have been available for over two years. And this study does make a comparison with the genome of *Tigriopus japonicus*, which has been around for a while. I have seen some comparative studies that incorporate analyses of these other copepod genomes, without calling them the "first genome." There are also many copepod transcriptomes freely available.

Response) The meaning of our previous title was the first genome paper describing copepods. Following your suggestions, we modified the title and added publically available copepod genome data in data description part line 30.

Given the availability of the other copepod genomes, this study would benefit from comparisons with at least the congener *Tigriopus californicus*, in addition to the congener *T. japonicus*.

Response) Thank you so much for your informative comments. At this moment, we have changed article type from "research note" to "data note" and need to reduce biological analysis. Following your valuable suggestions, we are going to compare *T. californicus* genome and transcriptome with *T. kingsejongensis* and *T. japonicus* in our future study.

The authors applied PAML to test for signatures of selection. I recommend that they also use HyPhy, which is more powerful, and able to make greater inferences than PAML.

Response) We have used PAML in this study according to following articles and we will apply HyPhy in the future study.  
Cao, Z., et al. (2013). "The genome of *Mesobuthus martensii* reveals a unique adaptation model of arthropods." *Nature communications* 4: 2602.

|                                                                                                                                                                                                                                                                                                                                                                                                                                                                                                                                     |                                                                                                                                                                                                                                                                                                                                                                                                                       |
|-------------------------------------------------------------------------------------------------------------------------------------------------------------------------------------------------------------------------------------------------------------------------------------------------------------------------------------------------------------------------------------------------------------------------------------------------------------------------------------------------------------------------------------|-----------------------------------------------------------------------------------------------------------------------------------------------------------------------------------------------------------------------------------------------------------------------------------------------------------------------------------------------------------------------------------------------------------------------|
|                                                                                                                                                                                                                                                                                                                                                                                                                                                                                                                                     | <p>Neafsey, D. E., et al. (2015). "Highly evolvable malaria vectors: The genomes of 16 Anopheles mosquitoes." <i>Science</i> 347(6217): 1258522.</p> <p>Qiu, Q., et al. (2012). "The yak genome and adaptation to life at high altitude." <i>Nature Genetics</i> 44(8): 946-949.</p> <p>Yim, H.-S., et al. (2014). "Minke whale genome and aquatic adaptation in cetaceans." <i>Nature Genetics</i> 46(1): 88-92.</p> |
| <b>Additional Information:</b>                                                                                                                                                                                                                                                                                                                                                                                                                                                                                                      |                                                                                                                                                                                                                                                                                                                                                                                                                       |
| <b>Question</b>                                                                                                                                                                                                                                                                                                                                                                                                                                                                                                                     | <b>Response</b>                                                                                                                                                                                                                                                                                                                                                                                                       |
| Are you submitting this manuscript to a special series or article collection?                                                                                                                                                                                                                                                                                                                                                                                                                                                       | No                                                                                                                                                                                                                                                                                                                                                                                                                    |
| <p><b>Experimental design and statistics</b></p> <p>Full details of the experimental design and statistical methods used should be given in the Methods section, as detailed in our <a href="#">Minimum Standards Reporting Checklist</a>. Information essential to interpreting the data presented should be made available in the figure legends.</p> <p>Have you included all the information requested in your manuscript?</p>                                                                                                  | Yes                                                                                                                                                                                                                                                                                                                                                                                                                   |
| <p><b>Resources</b></p> <p>A description of all resources used, including antibodies, cell lines, animals and software tools, with enough information to allow them to be uniquely identified, should be included in the Methods section. Authors are strongly encouraged to cite <a href="#">Research Resource Identifiers</a> (RRIDs) for antibodies, model organisms and tools, where possible.</p> <p>Have you included the information requested as detailed in our <a href="#">Minimum Standards Reporting Checklist</a>?</p> | Yes                                                                                                                                                                                                                                                                                                                                                                                                                   |
| <p><b>Availability of data and materials</b></p> <p>All datasets and code on which the conclusions of the paper rely must be either included in your submission or deposited in <a href="#">publicly available repositories</a> (where available and ethically appropriate), referencing such data using a unique identifier in the references and in the "Availability of Data and Materials" section of your manuscript.</p>                                                                                                      | Yes                                                                                                                                                                                                                                                                                                                                                                                                                   |

Have you have met the above requirement as detailed in our [Minimum Standards Reporting Checklist?](#)

[Click here to view linked References](#)

1 **The genome of Antarctic-endemic Copepod, *Tigriopus***  
2  
3  
4 ***kingsejongensis***  
5  
6  
7  
8  
9

10 Seunghyun Kang<sup>1¶</sup>, Do-Hwan Ahn<sup>1¶</sup>, Jun Hyuck Lee<sup>1,2</sup>, Sung Gu Lee<sup>1,2</sup>, Seung Chul Shin<sup>1</sup>,  
11 Jungeun Lee<sup>1</sup>, Gi-Sik Min<sup>3</sup>, Hyoungseok Lee<sup>1</sup>, Hyun-Woo Kim<sup>4\*&</sup>, Sanghee Kim<sup>5\*&</sup> & Hyun  
12 Park<sup>1,2\*&</sup>  
13  
14  
15  
16  
17  
18

19 <sup>1</sup> Unit of Polar Genomics, Korea Polar Research Institute, Yeonsu-gu, Incheon, South Korea  
20

21 <sup>2</sup> Polar Sciences, University of Science & Technology, Yuseong-gu, Daejeon, South Korea  
22

23 <sup>3</sup> Department of Biological Sciences, Inha University, Incheon, South Korea  
24

25 <sup>4</sup> Department of Marine Biology, Pukyong National University, Busan, South Korea  
26

27 <sup>5</sup> Division of Polar Life Sciences, Korea Polar Research Institute, Yeonsu-gu, Incheon, South  
28 Korea  
29  
30  
31

32 \* Corresponding author  
33

34 E-mail: kimhw@pknu.ac.kr; sangheekim@kopri.re.kr; hpark@kopri.re.kr  
35

36 ¶These authors contributed equally to this work.  
37  
38

39 &These authors also contributed equally to this work.  
40  
41  
42  
43  
44  
45  
46  
47  
48  
49  
50  
51  
52  
53  
54  
55  
56  
57  
58  
59  
60  
61  
62  
63  
64  
65

## Abstract

**Background:** The Antarctic intertidal zone is continuously subject to extreme fluctuations in biotic and abiotic stressors, and the West Antarctic Peninsula is the most rapidly warming region on earth. Organisms living in Antarctic intertidal pools are therefore of great interest for research on topics such as evolutionary adaptation to extreme environments and the effects of climate change.

**Findings:** Here, we report the whole-genome sequence of the Antarctic endemic Harpacticoid copepod, *Tigriopus kingsejongensis* with a total of 37 Gb raw DNA sequence using Illumina Miseq platform and the libraries were prepared with 65-fold coverage with a total length of 295 Mb. The final assembly consists of 48,368 contigs with an N50 contig length of 17.5 kb and 27,823 scaffolds with N50 contig length of 159.2 kb and a total of 12,772 coding genes were inferred using the MAKER annotation pipeline approach. Comparative genome analysis revealed that *T. kingsejongensis* specific genes are enriched in transport and metabolism processes. Furthermore, rapidly evolving genes related to energy metabolism showed signatures of positive selection.

**Conclusions:** The genome of *T. kingsejongensis* will provide an interesting example of an evolutionary strategy for Antarctic cold adaptation, and offers new genetic insights into Antarctic intertidal biota.

**Keywords:** Copepoda, Genome, Antarctic, adaptation, *Tigriopus*

## Data description

The subclass copepods are very diverse and approximately 12,000 copepod species have been described [1, 2]. They dominate the zooplankton community contributing about 70% of total zooplankton biomass [3] and play an important role in the marine meiobenthic food web

1 linking between the phytoplankton and higher trophic levels [4]. Harpacticoid copepods of the  
2  
3 genus *Tigriopus* Norman 1868 are dominant members of shallow supratidal rock pools  
4  
5 worldwide. They are distributed among habitats that vary widely in salinity, temperature,  
6  
7 desiccation risk, and UV radiation, and have been used as a model system to investigate topics  
8  
9 such as osmoregulation [5], temperature adaptation [6, 7] and environmental toxicology [8].

10  
11  
12  
13 As the genome resources of copepods has been publically available (*Tigriopus californicus*  
14  
15 [[http://i5k.nal.usda.gov/Tigriopus\\_californicus](http://i5k.nal.usda.gov/Tigriopus_californicus)], *Tigriopus japonicus* [9], *Eurytemora affinis*  
16  
17 [[http://i5k.nal.usda.gov/Eurytemora\\_affinis](http://i5k.nal.usda.gov/Eurytemora_affinis)] and salmon louse *Lepeophtheirus salmonis*  
18  
19 [<http://sealouse.imr.no/>]), now it is possible to explore their fundamental biological processes  
20  
21 and physiological responses to diverse environments.  
22  
23

24  
25 Antarctica provides not only an extreme habitat for extant organisms, but also a model for  
26  
27 research on evolutionary adaptations to cold environments [10, 11]. The Antarctic intertidal  
28  
29 zone, particularly in the Western Antarctic Peninsula region, is one of the most extreme  
30  
31 environments on earth. It also serves as a potential barometer for global climate changes, since  
32  
33 it is the fastest-warming region on earth [12]. Antarctic intertidal species that have evolved  
34  
35 stenothermal phenotypes through adaptation to a year-round climate of extreme cold may now  
36  
37 face extinction by global warming. The response of these species to further warming in Western  
38  
39 Antarctica is of serious concern; however, to date there have been few studies focusing on  
40  
41 species from the Antarctic intertidal zone.  
42  
43  
44  
45

46  
47 *Tigriopus kingsejongensis* was first found and recognized as a new endemic species in a rock  
48  
49 pool in the Antarctic Peninsula, and is extremely cold-tolerant and can survive in frozen sea  
50  
51 water [13]. We observed the morphological differences, such as increased numbers of caudal  
52  
53 setae in nauplii, optimal growth temperature (ca. 8°C) and developmental characteristics have  
54  
55 been compared to those of the congener *Tigriopus japonicus*, which is found in the coastal area  
56  
57 of the Yellow Sea. *Tigriopus kingsejongensis* has evolved to overcome the unique  
58  
59  
60  
61  
62  
63  
64  
65



1 environmental constrains of Antarctica, and therefore provides an ideal experimental model for  
2  
3 all aspects of research on extreme habitats. This species may represent a case of rapid  
4  
5 speciation, since the intertidal zone on King George Island and surrounding areas did not exist  
6  
7 before 10,000 years ago [14]. *Tigriopus kingsejongensis* likely evolved as a distinct species  
8  
9 within this relatively short time period. Thus, inter- and intraspecies comparative analyses of  
10  
11 Antarctic *Tigriopus* species will help define the trajectory of adaptation to the Antarctic  
12  
13 environment and also provide insights into the genetic basis of *Tigriopus* divergence and  
14  
15 evolution.  
16  
17  
18  
19  
20  
21

## 22 **Library construction and sequencing**

23

24  
25 *Tigriopus kingsejongensis* were collected from tidal pools in Potter Cove, near King  
26  
27 Sejong Station, on the northern Antarctic Peninsula (62°14'S, 58°47'W) (Fig. S1 and S2 in  
28  
29 additional file1) in January 2013 with a hand-nets. Water temperatures were  $1.6 \pm 0.8^{\circ}\text{C}$  during  
30  
31 this month. High-molecular-weight genomic DNA from pooled *T. kingsejongensis* was  
32  
33 extracted using the DNeasy Blood & Tissue Kit (Qiagen). For Illumina Miseq sequencing, four  
34  
35 library types were constructed with 350, 400, 450, and 500 bp for paired-end libraries, and 3  
36  
37 kb and 8 kb for mate-pair libraries, prepared using the standard Illumina sample preparation  
38  
39 methods (Table 1). All sequencing processes were performed according to the manufacturer's  
40  
41 instructions (Illumina).  
42  
43  
44  
45

46  
47 RNA was prepared from pooled *T. kingsejongensis* and *Tigriopus japonicus* specimens  
48  
49 from two different temperature experiments (4°C and 15°C) using the RNeasy Mini Kit  
50  
51 (Qiagen). For Illumina Miseq sequencing, subsequent experiments were carried out under the  
52  
53 manufacturer's instructions (Illumina). The *de novo* transcriptome assembly was performed  
54  
55 with CLC Genomics Workbench, setting the minimum allowed contig length to 200  
56  
57 nucleotides. The assembly process generated 40,172 contigs with a max length of 23,942 bp  
58  
59  
60  
61  
62  
63  
64  
65

1 and an N50 value of 1,093 bp. These generated contigs were used as reference sequences for  
2  
3 mapping of trimmed reads, and fold changes in expression for each gene were calculated with  
4  
5 a significance threshold of  $P \leq 0.05$  using CLC Genomics Workbench (Table 2 and 3).  
6  
7  
8  
9

## 10 11 **Genome assembly**

12  
13 **First, k-mer analysis was conducted using jellyfish 2.2.5 [15] to estimate the genome**  
14  
15 **size from DNA paired-end libraries. The estimateds genome size was 298 Mb with main peak**  
16  
17 **at a depth of ~39x (Fig. 1). Then, assemblies** were performed using a Celera Assembler with  
18  
19 Illumina short reads [16]. Prior to assembly, Illumina reads were trimmed using the FASTX-  
20  
21 Toolkit ([http://hannonlab.cshl.edu/fastx\\_toolkit](http://hannonlab.cshl.edu/fastx_toolkit)) with parameters -t 20, -l 70 and -Q 33, after  
22  
23 which a paired sequence from trimmed Illumina reads was selected. Finally, trimmed Illumina  
24  
25 reads with 65-fold coverage (insert sizes 350, 400, 450, and 500 bp) were obtained and  
26  
27 converted to the FRG file format (required by the Celera assembler) using FastqToCA.  
28  
29 Assembly was performed on a 96-processor workstation with Intel Xeon X7460 2.66 GHz  
30  
31 processors and 1 terabyte RAM with the following parameters: overlapper = ovl, unitigger =  
32  
33 bogart, utgGraphErrorRate = 0.03, utgGraphErrorLimit = 2.5, utgMergeErrorRate = 0.030,  
34  
35 utgMergeErrorLimit = 3.25, ovlErrorRate = 0.1, cnsErrorRate = 0.1, cgwErrorRate = 0.1,  
36  
37 merSize = 22, and doOverlapBasedTrimming = 1. The initial Celera assembly had a total size  
38  
39 of 305 Mb, N50 contig size of 17,566 bp, and max contig size of 349.5 kb. Scaffolding was  
40  
41 completed using the software SSPACE 2.0 scaffolder using mate-paired data [17].  
42  
43 Subsequently, we closed gaps using Gapfiller Ver.1.9 software with 65× trimmed Illumina  
44  
45 reads with default settings [18]. *De novo* assembly of 203 million reads from paired-end  
46  
47 libraries and mate-paired libraries yielded a draft assembly (65-fold coverage) with a total  
48  
49 length of 295 Mb, and contig and scaffold N50 sizes of 17.6 kb and 159.2 kb, respectively  
50  
51  
52  
53  
54  
55  
56  
57  
58  
59  
60  
61  
62  
63  
64  
65

1 (Table 4 and Fig. 2).  
2  
3  
4

## 5 **Annotation**

6

7  
8 We used MAKER for genome annotation [19]. MAKER is a portable and easily  
9 configurable genome annotation pipeline. MAKER first identified repetitive elements using  
10 RepeatMasker [20]. This masked genome sequence was used for *ab initio* gene prediction with  
11 RepeatMasker [20]. This masked genome sequence was used for *ab initio* gene prediction with  
12 SNAP software [21], after which alignment of expressed sequence tags with BLASTn and  
13 protein information from tBLASTx were included. We used the *de novo* repeat library of *T.*  
14 *kingsejongensis* from RepeatModeler for RepeatMasker; proteins from five species with data  
15 from *D. melanogaster*, *D. pulex*, *T. japonicus*, and *Tigriopus californicus* were included in the  
16 analysis. RNA-seq-based gene prediction was performed by aligning all RNA-seq data against  
17 the assembled genome using TopHat [22], and Cufflinks [23] was used to predict cDNAs from  
18 the resultant data. Next, MAKER polished the alignments using the program Exonerate [24],  
19 which provided integrated information to synthesize SNAP annotation. MAKER then selected  
20 and revised the final gene model considering all information. A total of 12,772 genes were  
21 predicted using MAKER in *T. kingsejongensis*. Annotated genes contained an average of 4.6  
22 exons, with an average mRNA length of 1,090 bp. Additionally, 12,562 of 12,772 genes were  
23 assigned preliminary functions based on automated annotation using Blast2GO (Ver. 2.6.0)  
24 [25] (Fig. S3 and S4 in additional file 1). The Infernal software package (Ver. 1.1) [26] and  
25 covariance models (CMs) from the Rfam database [27] were used to identify other non-coding  
26 RNAs in the *T. kingsejongensis* scaffold. We identified putative tRNA genes using tRNAscan-  
27 SE [28] (Table S1 in additional file 2). tRNAscan-SE uses a covariance model (CM) that scores  
28 candidates based on their sequence and predicted secondary structures.  
29  
30  
31  
32  
33  
34  
35  
36  
37  
38  
39  
40  
41  
42  
43  
44  
45  
46  
47  
48  
49  
50  
51  
52  
53  
54

55  
56 Non-gap sequences occupied 284.8 Mb (96.5%), and simple sequence repeats (SSRs)  
57 were 1.2 Mb (0.4%) in total (Table S2 in additional file 2). Transposable elements (TEs)  
58  
59  
60  
61  
62  
63  
64  
65

1 comprised 6.5 Mb, which is roughly 2.3% of the assembled genome (Table S2 and S3 in  
2 additional file 2). On the basis of homology and *ab initio* gene prediction, we found that the  
3 genome of *T. kingsejongensis* contains 12,772 protein-coding genes (Table 5). By assessing  
4 the quality of the annotated 12,772 gene models, we found that 11,686 protein-coding genes  
5 (91.5%) were supported by the RNA-seq data, of which, 7,325 (63%) showed similarity to  
6 proteins from other species. We also found that 179 of 248 CEGMA (Core Eukaryotic Genes  
7 Mapping Approach) core genes [29] were fully annotated (72.18 % completeness) and 197 of  
8 248 genes were partially annotated (79.44 % completeness).  
9  
10  
11  
12  
13  
14  
15  
16  
17  
18  
19  
20  
21  
22  
23

## 24 Gene families

25  
26  
27 The orthologous groups were identified from 11 species (*T. kingsejongensis*, *Aedes*  
28 *aegypti*, *D. melanogaster*, *Ixodes scapularis*, *M. martensii*, *Strigamia martima*, *Tetranychus*  
29 *urticae*, *D. pulex*, *Homo sapiens*, *Ciona intestinalis*, and *Caenorhabditis elegans*) (Table 6)  
30 using OrthoMCL [30] with standard parameters and options, and transcript variants other than  
31 the longest translation forms were removed. For *T. kingsejongensis*, the coding sequence from  
32 the MAKER annotation pipeline was used. The 1:1:1 single-copy orthologous genes were  
33 subjected to phylogenetic construction and divergence time estimation. Protein-coding genes  
34 were aligned using PRANK with the codon alignment option [31], and poorly aligned  
35 sequences with gaps were removed using Gblock under the codon model [32]. We constructed  
36 a maximum-likelihood phylogenetic tree using RAxML with 1,000 bootstrap values [33] and  
37 calibrated the divergence time between species with TimeTree [34]. Finally, the average gene  
38 gain/loss rate along the given phylogeny was identified using the program CAFÉ 3.1 [35]. We  
39 constructed orthologous gene clusters using four arthropod species (Antarctic copepod, *T.*  
40 *kingsejongensis*; scorpion, *Mesobuthus martensii*; fruit fly, *Drosophila melanogaster* and  
41  
42  
43  
44  
45  
46  
47  
48  
49  
50  
51  
52  
53  
54  
55  
56  
57  
58  
59  
60  
61  
62  
63  
64  
65

1 water flea, *Daphnia pulex*) to compare the genomic features and the adaptive divergence in the  
2  
3 arthropods. In total, 2,063 gene families are shared by all four species, and 1,028 genes are  
4  
5 specific to the Antarctic copepod. *Tigriopus kingsejongensis* shares 4,559 (73.5%) gene  
6  
7 families with *D. pulex*, which belongs to the same crustacean lineage Vericrustacea, 3,531  
8  
9 (56.9%) with *D. melanogaster*, and 3,231 (52.1%) with *M. martensii* (Fig. 3A). Gene ontology  
10  
11 (GO) analysis revealed that the 1,028 *T. kingsejongensis*-specific genes are enriched in  
12  
13 transport (single-organism transport, GO: 0044765; transmembrane transport, GO: 0055085;  
14  
15 ion transport, GO: 0006811; cation transport, GO: 0006812) and single-organism metabolic  
16  
17 processes (GO: 0044710) (Table S4 and S5 in additional file 2). Subsequently, we performed  
18  
19 gene gain-and-loss analysis on 11 representative species, and found that *T. kingsejongensis*  
20  
21 gained 735 gene families and lost 4,401 gene families (Fig. 3B). Thus, this species exhibits a  
22  
23 gene family turnover of 5,136, the largest value among the eight arthropods. We also analyzed  
24  
25 expansion and contraction of the gene families (Table S6-S9 in additional file 2), and found  
26  
27 232 significantly expanded gene families in *T. kingsejongensis*; these gene families are  
28  
29 significantly overrepresented in amino acid metabolism and carbohydrate metabolism in  
30  
31 KEGG metabolic pathways.  
32  
33  
34  
35  
36  
37  
38  
39  
40  
41  
42  
43  
44

## 45 **Genome evolution**

46  
47  
48 Adaptive functional divergence caused by natural selection is commonly estimated  
49  
50 based on the ratio of nonsynonymous ( $dN$ ) to synonymous ( $dS$ ) mutations. To estimate  $dN$ ,  $dS$ ,  
51  
52 and average  $dN/dS$  ratio ( $w$ ), and lineage-specific PSGs in *T. kingsejongensis* and *T. japonicus*,  
53  
54 protein-coding genes from *T. japonicus* were added to define orthologous gene families among  
55  
56 the four species (*T. kingsejongensis*, *T. japonicus*, *D. pulex*, and *D. melanogaster*) using the  
57  
58  
59  
60  
61  
62  
63  
64  
65

1 program OrthoMCL with the same conditions previously described. We identified 2,937  
2  
3 orthologous groups shared by all four species, and single-copy gene families were used to  
4  
5 construct a phylogenetic tree and estimate the time since divergence using the same methods  
6  
7 described above. Each of the identified orthologous genes was aligned using the PRANK, and  
8  
9 poorly aligned sequences with gaps were removed using Gblock. Alignments showing less than  
10  
11 40% identity and genes shorter than 150 bp were eliminated in subsequent procedures. The  
12  
13 values of  $dN$ ,  $dS$  and  $w$  were estimated from each gene using the Codeml program implemented  
14  
15 in the PAML package with the free-ratio model [36] under F3X4 codon frequencies, and  
16  
17 orthologs with  $w \leq 5$  and  $dS \leq 3$  were retained [37]. To examine the accelerated  
18  
19 nonsynonymous divergence in either *T. kingsejongensis* or *T. japonicus* lineage, a binomial  
20  
21 test [38] was used to determine GO categories with at least 20 orthologous genes. To define  
22  
23 PSGs in *T. kingsejongensis* and *T. japonicus*, we applied basic and branch-site models, and  
24  
25 Likelihood Ratio Tests (LRTs) were used to remove genes under relaxation of selective  
26  
27 pressure. To investigate which functional categories and pathways were enriched in the PSGs,  
28  
29 we performed DAVID Functional Annotation [39] with Fisher's exact test (cutoff:  $P \leq 0.05$ ).  
30  
31  
32  
33  
34  
35  
36  
37  
38

39 The average  $w$  value from 2,937 co-orthologous genes of *T. kingsejongensis* (0.0027)  
40  
41 is higher than that of *T. japonicus* (0.0022). The GO categories that showing evidence of  
42  
43 accelerated evolution in *T. kingsejongensis* are energy metabolism (generation of precursor  
44  
45 metabolites and energy, GO: 0006091; cellular respiration, GO: 0045333) and carbohydrate  
46  
47 metabolism (monosaccharide metabolic process, GO: 0005996; hexose metabolic process, GO:  
48  
49 0019318) (Figure 4A, Table S10 in Additional file 2). Branch-site model analysis showed that  
50  
51 the genes belonging to the functional categories above have undergone a significant positive  
52  
53 selection process by putative functional divergence in certain lineages. There are 74 and 79  
54  
55 positively selected genes (PSGs) in *T. kingsejongensis* (Table S11 in Additional file 2) and *T.*  
56  
57  
58  
59  
60  
61  
62  
63  
64  
65

1 *japonicus* (Table S12 in Additional file 2), respectively. The functional categories enriched in  
2  
3 *T. kingsejongensis*, when compared to *T. japonicus*, support the idea that the functional  
4  
5 divergence in *T. kingsejongensis* is strongly related to energy metabolism (oxidative  
6  
7 phosphorylation, GO: 0006119; energy-coupled proton transport down electrochemical  
8  
9 gradient, GO: 0015985; ATP synthesis-coupled proton transport, GO: 0015986; generation of  
10  
11 precursor metabolites and energy, GO: 0006091) (Figure 4B, Table S13 and S14 in Additional  
12  
13 file 2). In particular, three of the identified genes are involved in the oxidative phosphorylation  
14  
15 (OxPhos) pathway, which provides the primary cellular energy source in the form of adenosine  
16  
17 triphosphate (ATP). These three genes are nuclear-encoded mitochondrial genes: the catalytic  
18  
19 F1 ATP synthase subunit alpha (*ATP5A*) (Fig. S5 in Additional file 1), a regulatory subunit  
20  
21 acting as an electron transport chain such as ubiquinol-cytochrome *c* reductase core protein  
22  
23 (*UQCRC1*) (Fig. S6 in Additional file 1), and an electron transfer flavoprotein alpha subunit  
24  
25 (*ETFFA*) (Fig. S7 in Additional file 1).  
26  
27  
28  
29  
30  
31  
32

### 33 **Availability of supporting data**

34  
35 The data for *T. kingsejongensis* genome and transcriptome has been deposited in the SRA as  
36  
37 BioProject PRJNA307207 and PRJNA307513, respectively.  
38  
39  
40  
41

### 42 **List of abbreviations**

43  
44 simple sequence repeats, SSRs; Transposable elements, TEs; CEGMA, Core Eukaryotic Genes  
45  
46 Mapping Approach; Gene ontology, GO  
47  
48  
49  
50

### 51 **Competing interests**

52  
53 The authors declare no competing interests.  
54  
55  
56  
57  
58  
59  
60  
61  
62  
63  
64  
65

1 **Funding**

2  
3  
4 This work was supported by an Antarctic organisms: Cold-adaptation mechanism and its  
5 application grant (PE16070) and the basic research program (PE14260) funded by the Korea  
6  
7 Polar Research Institute (KOPRI).  
8  
9

10  
11  
12 **Author contributions**

13  
14  
15 H.P., Sanghee Kim and H.W.K. conceived and designed experiments and analyses; Seunghyun  
16 Kang, D.-H.A., S.G.L., S.C.S., J.L., G.S.M. and H.L. performed experiments and conducted  
17  
18 bioinformatics. Seunghyun Kang, H.W.K., Sanghee Kim and H.P. wrote the paper.  
19  
20  
21  
22

23  
24 **Acknowledgements**

25  
26  
27 We would like to thank Joseph A. Covi for comments and discussion.  
28  
29  
30  
31  
32  
33  
34  
35  
36  
37  
38  
39  
40  
41  
42  
43  
44  
45  
46  
47  
48  
49  
50  
51  
52  
53  
54  
55  
56  
57  
58  
59  
60  
61  
62  
63  
64  
65



## References

1. Huys R, Boxshall GA: *Copepod evolution*. Ray Society; 1991.
2. Humes AG: **How many copepods?** *Hydrobiologia* 1994, **292**:1-7.
3. Wells P, Persoone G, Jaspers E, C. C: *Marine ecotoxicological tests with zooplankton*. In: *Persoone, G., Jaspers, E., Claus, C. (Eds.), Ecotoxicological Testing for the Marine Environment*. Inst. Mar. Sci. Res., Bredene; 1984.
4. Ruppert E, Fox R, Barnes R: **Invertebrate Zoology, A Functional Evolutionary Approach**. Brooks/Cole-Thomson Learning, Belmont, CA 2003.
5. Goolish E, Burton R: **Energetics of osmoregulation in an intertidal copepod: Effects of anoxia and lipid reserves on the pattern of free amino accumulation**. *Funct Ecol* 1989:81-89.
6. Lazzaretto I, Libertini A: **Karyological comparison among different Mediterranean populations of the genus *Tigriopus* (Copepoda Harpacticoida)**. *Boll Zool* 2009, **53**:197-201.
7. Davenport J, Barnett P, McAllen R: **Environmental tolerances of three species of the harpacticoid copepod genus *Tigriopus***. *J Mar Biol Assoc UK* 1997, **77**:3-16.
8. Raisuddin S, Kwok KW, Leung KM, Schlenk D, Lee J-S: **The copepod *Tigriopus*: A promising marine model organism for ecotoxicology and environmental genomics**. *Aquat Toxicol* 2007, **83**:161-173.
9. Lee J-S, Rhee J-S, Kim R-O, Hwang D-S, Han J, Choi B-S, Park GS, Kim I-C, Park HG, Lee Y-M: **The copepod *Tigriopus japonicus* genomic DNA information (574Mb) and molecular anatomy**. *Mar Environ Res* 2010, **69**:S21-S23.
10. Thorne MAS, Kagoshima H, Clark MS, Marshall CJ, Wharton DA: **Molecular analysis of the cold tolerant Antarctic Nematode, *Panagrolaimus davidi***. *PLOS one* 2014, **9**:e104526.
11. Everatta MJ, Worlandb MR, Balea JS, Conveyb P, Hayward SAL: **Pre-adapted to the maritime Antarctic? – Rapid cold hardening of the midge, *Eretmoptera murphyi***. *J Insect*

- 1 *Physiol* 2012, **58**:1104–1111.
- 2
- 3 12. Bromwich DH, Nicolas JP, Monaghan AJ, Lazzara MA, Keller LM, Weidner GA, Wilson AB:
- 4 **Central West Antarctica among the most rapidly warming regions on Earth.** *Nature*
- 5 *Geoscience* 2013, **6**:139-145.
- 6
- 7
- 8
- 9
- 10 13. Park E-O, Lee S, Cho M, Yoon SH, Lee Y, Lee W: **A new species of the genus *Tigriopus***
- 11 **(Copepoda: Harpacticoida: Harpacticidae) from Antarctica.** *Proc Biol Soc Wash* 2014,
- 12 **127**:138-154.
- 13
- 14
- 15
- 16 14. Birkenmajer K: **Geology of Admiralty Bay, King George Island (South Shetland Islands).**
- 17 **An outline.** *Pol Polar Res* 1980, **1**:29-54.
- 18
- 19
- 20
- 21 15. Marçais G, Kingsford C: **A fast, lock-free approach for efficient parallel counting of**
- 22 **occurrences of k-mers.** *Bioinformatics* 2011, **27**:764-770.
- 23
- 24
- 25 16. Myers EW, Sutton GG, Delcher AL, Dew IM, Fasulo DP, Flanigan MJ, Kravitz SA, Mobarry
- 26 CM, Reinert KH, Remington KA, et al: **A whole-genome assembly of *Drosophila*.** *Science*
- 27 2000, **287**:2196-2204.
- 28
- 29
- 30
- 31 17. Boetzer M, Henkel CV, Jansen HJ, Butler D, Pirovano W: **Scaffolding pre-assembled contigs**
- 32 **using SSPACE.** *Bioinformatics* 2011, **27**:578-579.
- 33
- 34
- 35
- 36 18. Nadalin F, Vezzi F, Policriti A: **GapFiller: a *de novo* assembly approach to fill the gap**
- 37 **within paired reads.** *BMC Bioinformatics* 2012, **13**:S8.
- 38
- 39
- 40
- 41 19. Holt C, Yandell M: **MAKER2: an annotation pipeline and genome-database management**
- 42 **tool for second-generation genome projects.** *BMC Bioinformatics* 2011, **12**:491.
- 43
- 44
- 45 20. Smit AFA HR, Green, P.: **RepeatMasker Open-3.0. 1996-2004**
- 46 **(<http://www.RepeatMasker.org>).**
- 47
- 48
- 49
- 50 21. Korf I: **Gene finding in novel genomes.** *BMC Bioinformatics* 2004, **5**:59.
- 51
- 52 22. Trapnell C, Pachter L, Salzberg SL: **TopHat: discovering splice junctions with RNA-Seq.**
- 53 *Bioinformatics* 2009, **25**:1105-1111.
- 54
- 55
- 56 23. Trapnell C, Williams BA, Pertea G, Mortazavi A, Kwan G, van Baren MJ, Salzberg SL, Wold
- 57 BJ, Pachter L: **Transcript assembly and quantification by RNA-Seq reveals unannotated**
- 58
- 59
- 60
- 61
- 62
- 63
- 64
- 65

- 1 transcripts and isoform switching during cell differentiation. *Nat Biotech* 2010, **28**:511-  
2 515.  
3  
4  
5 24. Slater GS, Birney E: **Automated generation of heuristics for biological sequence**  
6 **comparison.** *BMC Bioinformatics* 2005, **6**:31.  
7  
8  
9 25. Conesa A, Gotz S, Garcia-Gomez JM, Terol J, Talon M, Robles M: **Blast2GO: a universal**  
10 **tool for annotation, visualization and analysis in functional genomics research.**  
11 *Bioinformatics* 2005, **21**:3674-3676.  
12  
13  
14 26. Nawrocki EP, Kolbe DL, Eddy SR: **Infernal 1.0: inference of RNA alignments.**  
15 *Bioinformatics* 2009, **25**:1335-1337.  
16  
17  
18 27. Gardner PP, Daub J, Tate J, Moore BL, Osuch IH, Griffiths-Jones S, Finn RD, Nawrocki EP,  
19 Kolbe DL, Eddy SR, Bateman A: **Rfam: Wikipedia, clans and the "decimal" release.**  
20 *Nucleic Acids Res* 2011, **39**:D141-145.  
21  
22  
23 28. Lowe TM, Eddy SR: **tRNAscan-SE: a program for improved detection of transfer RNA**  
24 **genes in genomic sequence.** *Nucleic Acids Res* 1997, **25**:955-964.  
25  
26  
27 29. Parra G, Bradnam K, Korf I: **CEGMA: a pipeline to accurately annotate core genes in**  
28 **eukaryotic genomes.** *Bioinformatics* 2007, **23**:1061-1067.  
29  
30  
31 30. Li L, Stoeckert CJ, Roos DS: **OrthoMCL: identification of ortholog groups for eukaryotic**  
32 **genomes.** *Genome Res* 2003, **13**:2178-2189.  
33  
34  
35 31. Löytynoja A, Goldman N: **An algorithm for progressive multiple alignment of sequences**  
36 **with insertions.** *Proc Natl Acad Sci U S A* 2005, **102**:10557-10562.  
37  
38  
39 32. Castresana J: **Selection of conserved blocks from multiple alignments for their use in**  
40 **phylogenetic analysis.** *Mol Biol Evol* 2000, **17**:540-552.  
41  
42  
43 33. Stamatakis A: **RAxML version 8: a tool for phylogenetic analysis and post-analysis of large**  
44 **phylogenies.** *Bioinformatics* 2014, **30**:1312-1313.  
45  
46  
47 34. Hedges SB, Dudley J, Kumar S: **TimeTree: a public knowledge-base of divergence times**  
48 **among organisms.** *Bioinformatics* 2006, **22**:2971-2972.  
49  
50  
51 35. Han MV, Thomas GW, Lugo-Martinez J, Hahn MW: **Estimating gene gain and loss rates in**  
52  
53  
54  
55  
56  
57  
58  
59  
60  
61  
62  
63  
64  
65

1           **the presence of error in genome assembly and annotation using CAFE 3.** *Mol Biol Evol*  
2  
3           2013, **30**:1987-1997.  
4

5           36.    Yang Z: **PAML 4: phylogenetic analysis by maximum likelihood.** *Mol Biol Evol* 2007,  
6  
7           **24**:1586-1591.  
8

9  
10          37.    Zhang G, Li C, Li Q, Li B, Larkin DM, Lee C, Storz JF, Antunes A, Greenwold MJ, Meredith  
11  
12          **RW: Comparative genomics reveals insights into avian genome evolution and adaptation.**  
13  
14          *Science* 2014, **346**:1311-1320.  
15

16          38.    Consortium TCSaA: **Initial sequence of the chimpanzee genome and comparison with the**  
17  
18          **human genome.** *Nature* 2005, **437**:69-87.  
19

20  
21          39.    Huang DW, Sherman BT, Lempicki RA: **Systematic and integrative analysis of large gene**  
22  
23          **lists using DAVID bioinformatics resources.** *Nature protocols* 2008, **4**:44-57.  
24  
25  
26  
27  
28  
29  
30  
31  
32  
33  
34  
35  
36  
37  
38  
39  
40  
41  
42  
43  
44  
45  
46  
47  
48  
49  
50  
51  
52  
53  
54  
55  
56  
57  
58  
59  
60  
61  
62  
63  
64  
65

1 **Figure legends**  
2  
3

4 **Figure 1** Estimation of the *T. kingsejongensis* genome size based on 33-mer analysis. The x-  
5 axis represents the depth (peak at 39X) and the y-axis represents the proportion. The genome  
6 size was estimated as 298 Mb (total k-mer number/volume peak).  
7  
8  
9

10  
11  
12  
13 **Figure 2** Scaffold and contig size distributions of *T. kingsejongensis*. The percentage of the  
14 assembly included (y-axis) in contigs or scaffolds of a minimum size (x-axis, log scale) is  
15 shown for the contig (red) and scaffold (blue).  
16  
17  
18  
19

20  
21  
22  
23  
24 **Figure 3** Comparative genome analyses of the *T. kingsejongensis* genome. **a** Venn diagram of  
25 orthologous gene clusters between the four arthropod lineages. **b** Gene family gain-and-loss  
26 analysis. The number of gained gene families (red), lost gene families (blue) and orphan gene  
27 families (black) are indicated for each species. Time lines specify divergence times between  
28 the lineages.  
29  
30  
31  
32  
33  
34  
35  
36  
37  
38

39 **Table legends**  
40

41  
42 **Table 1** Statistics for each DNA library.  
43

44  
45 **Table 2** Sequencing and assembly results of transcriptome analysis of *T. japonicus*.  
46

47  
48 **Table 3** Sequencing statistics of RNA-seq analysis of *T. kingsejongensis*.  
49

50  
51 **Table 4** Statistics of genome assembly.  
52

53  
54 **Table 5** General statistics of genes in *T. kingsejongensis*.  
55

56  
57 **Table 6** Summary of orthologous gene clusters in the 11 representative species.  
58  
59  
60  
61  
62  
63  
64  
65

**Table 1** Statistics for each DNA library.

| <b>Library</b>   |             | <b>Reads (n)</b> | <b>Ave. length</b> | <b>Sequences (bp) (n)</b> | <b>Reads (trimmed) (n)</b> | <b>Ave. length</b> | <b>Sequences (trimmed) (n)</b> |
|------------------|-------------|------------------|--------------------|---------------------------|----------------------------|--------------------|--------------------------------|
| Paired-end       | Sum         | 99,710,266       |                    | 29,271,916,613            | 65,644,374                 |                    | 14,668,956,871                 |
|                  | 350S1       | 6,661,392        | 300                | 2,005,078,992             | 4,446,394                  | 233                | 1,034,231,244                  |
|                  | 350S2       | 4,933,058        | 265                | 1,311,700,122             | 4,618,711                  | 211                | 975,471,763                    |
|                  | 400S1       | 65,668,598       | 300                | 19,766,247,998            | 36,863,154                 | 228                | 8,397,426,481                  |
|                  | 450S1       | 3,418,988        | 300                | 1,029,115,388             | 2,812,455                  | 230                | 646,302,159                    |
|                  | 450S2       | 8,009,162        | 245                | 1,968,652,020             | 7,660,814                  | 199                | 1,527,566,312                  |
|                  | 500S1       | 11,019,068       | 289                | 3,191,122,093             | 9,242,846                  | 226                | 2,087,958,911                  |
| Mate-Paired      | Sum         | 103,373,998      |                    | 7,753,049,850             | 73,515,391                 |                    | 5,169,006,268                  |
|                  | 3KS1        | 8,374,238        | 75                 | 628,067,850               | 6,745,546                  | 73                 | 493,099,413                    |
|                  | 3KS2        | 9,250,994        | 75                 | 693,824,550               | 5,281,513                  | 65                 | 344,618,723                    |
|                  | 3KS3        | 51,349,594       | 75                 | 3,851,219,550             | 39,147,167                 | 72                 | 2,816,638,666                  |
|                  | 3KS4        | 3,063,232        | 75                 | 229,742,400               | 1,740,986                  | 65                 | 112,554,745                    |
|                  | 8KS1        | 9,847,636        | 75                 | 738,572,700               | 7,887,612                  | 73                 | 572,246,251                    |
|                  | 8KS2        | 16,322,038       | 75                 | 1,224,152,850             | 9,653,293                  | 65                 | 630,842,698                    |
|                  | 8KS3        | 5,166,266        | 75                 | 387,469,950               | 3,059,274                  | 65                 | 199,005,774                    |
| Total            | 203,084,264 |                  | 37,024,966,463     | 139,159,765               |                            | 19,837,963,139     |                                |
| Coverage (folds) |             |                  | 120.7              |                           | 64.7                       |                    |                                |

**Table 2** Sequencing and assembly results of transcriptome analysis of *T. japonicus*.

| <b>Sequencing</b>           |               |
|-----------------------------|---------------|
| Total reads (n)             | 37,956,160    |
| Total bases (n)             | 7,714,415,316 |
| Trimmed reads (n)           | 35,577,636    |
| Trimmed bases (n)           | 5,989,188,343 |
| <b>Assembly</b>             |               |
| Contigs (n)                 | 40,172        |
| Total contig length (bases) | 28,850,726    |
| N50 contig length (bases)   | 1,093         |
| Max scaffold length (bases) | 23,942        |
| <b>Annotation</b>           |               |
| With blast results          | 20,392        |
| Without blast hits          | 7,090         |
| With mapping results        | 8,172         |
| Annotated sequences         | 4,518         |

**Table 3** Sequencing statistics of RNA-seq analysis of *T. kingsejongensis*.

|                   | <b>4°C</b>    | <b>15°C</b>   |
|-------------------|---------------|---------------|
| Total reads (n)   | 15,786,118    | 16,417,072    |
| Total bases (n)   | 3,567,662,668 | 3,763,295,032 |
| Trimmed reads (n) | 14,845,103    | 15,388,513    |
| Trimmed bases (n) | 2,761,189,158 | 2,833,805,442 |



**Table 4** Statistics of genome assembly.

---

**Celera assembler (Version : 8.0)**

---

|          |                               |             |
|----------|-------------------------------|-------------|
| Scaffold | Total scaffold length (bases) | 295,233,602 |
|          | Gap size (bases)              | 10,474,460  |
|          | Scaffolds (n)                 | 11,558      |
|          | N50 scaffold length (bases)   | 159,218     |
|          | Max scaffold length (bases)   | 3,401,446   |
| Contig   | Total contig length (bases)   | 305,712,242 |
|          | Contigs (n)                   | 48,368      |
|          | N50 contig length (bases)     | 17,566      |
|          | Max contig length (bases)     | 349,507     |

---

**Table 5** General statistics of genes in *T. kingsejongensis*.

---

|                          |            |
|--------------------------|------------|
| Genes (n)                | 12,772     |
| Gene Length Sum (bp)     | 82,293,116 |
| Exons per genes (n)      | 4.6        |
| mRNA Length Sum (bp)     | 43,306,342 |
| Average mRNA length (bp) | 1,090      |
| Number of tRNA           | 1,393      |
| Number of rRNA           | 215        |

---

**Table 6** Summary of orthologous gene clusters in the 11 representative species.

| Species                        | Source of data                                                                                              | No. of coding genes | No. of gene families | No. of genes in gene families | No. of orphan genes | No. of unique gene families | Average No. of genes in gene families |
|--------------------------------|-------------------------------------------------------------------------------------------------------------|---------------------|----------------------|-------------------------------|---------------------|-----------------------------|---------------------------------------|
| <i>Aedes aegypti</i>           | Ensembl genome 25                                                                                           | 15,797              | 7,958                | 12,792                        | 7,839               | 854                         | 1.61                                  |
| <i>Caenorhabditis elegans</i>  | Ensembl gene 78                                                                                             | 20,447              | 6,536                | 13,737                        | 13,911              | 1,528                       | 2.10                                  |
| <i>Ciona intestinalis</i>      | Ensembl gene 78                                                                                             | 16,671              | 7,017                | 9,058                         | 9,654               | 503                         | 1.29                                  |
| <i>Daphnia pulex</i>           | Ensembl genome 25                                                                                           | 30,590              | 6,710                | 8,362                         | 7,208               | 368                         | 1.25                                  |
| <i>Drosophila melanogaster</i> | Ensembl gene 78                                                                                             | 13,918              | 9,673                | 21,917                        | 20,917              | 2,408                       | 2.27                                  |
| <i>Homo sapiens</i>            | Ensembl gene 78                                                                                             | 20,300              | 8,696                | 17,186                        | 11,604              | 1,065                       | 1.98                                  |
| <i>Ixodes scapularis</i>       | Ensembl genome 25                                                                                           | 20,486              | 8,097                | 11,277                        | 12,389              | 873                         | 1.39                                  |
| <i>Mesobuthus martensii</i>    | <a href="http://lifecenter.sgst.cn/main/en/scorpion.jsp">http://lifecenter.sgst.cn/main/en/scorpion.jsp</a> | 32,016              | 8,389                | 19,961                        | 23,627              | 2,276                       | 2.38                                  |
| <i>Strigamia maritima</i>      | Ensembl genome 25                                                                                           | 14,992              | 7,727                | 11,012                        | 7,265               | 583                         | 1.43                                  |
| <i>Tetranychus urticae</i>     | Ensembl genome 25                                                                                           | 18,224              | 6,602                | 11,788                        | 11,622              | 939                         | 1.79                                  |
| <i>T. kingsejongensis</i>      | this study                                                                                                  | 12,772              | 6,205                | 8,813                         | 6,567               | 649                         | 1.42                                  |

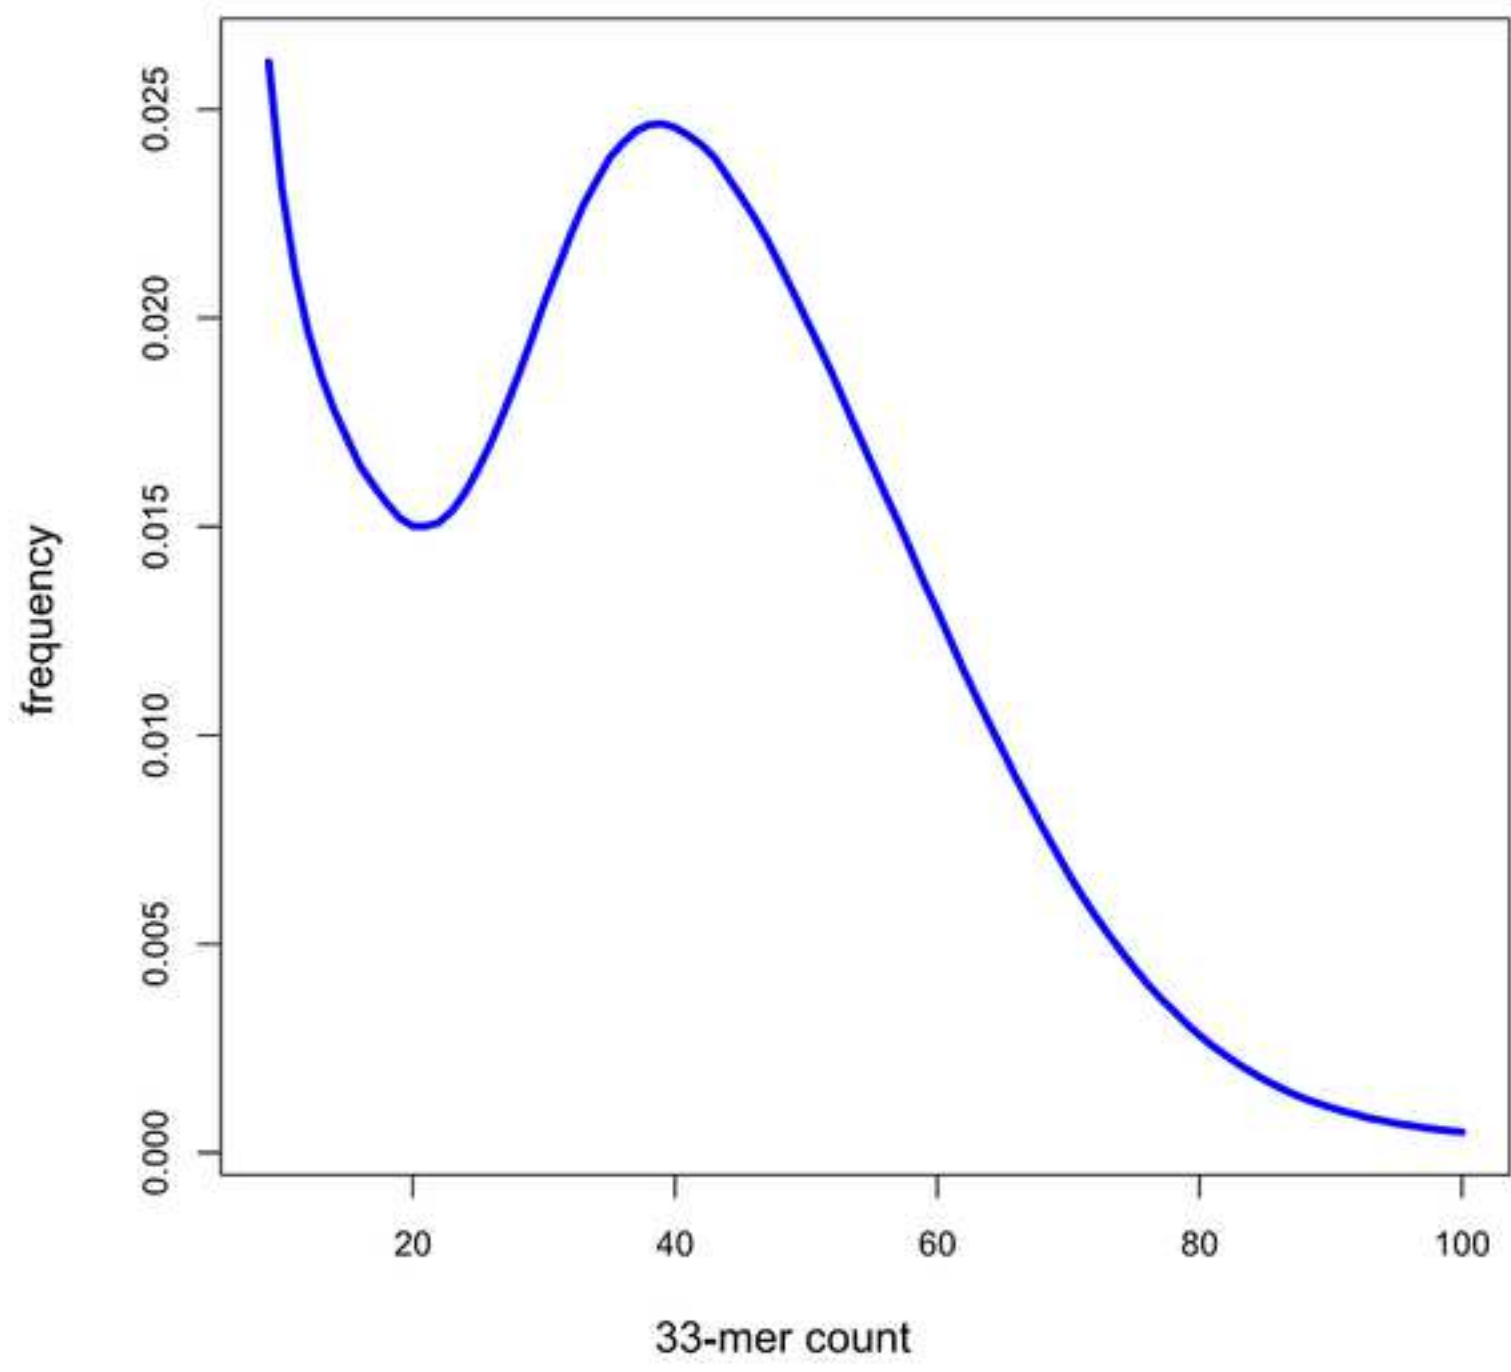

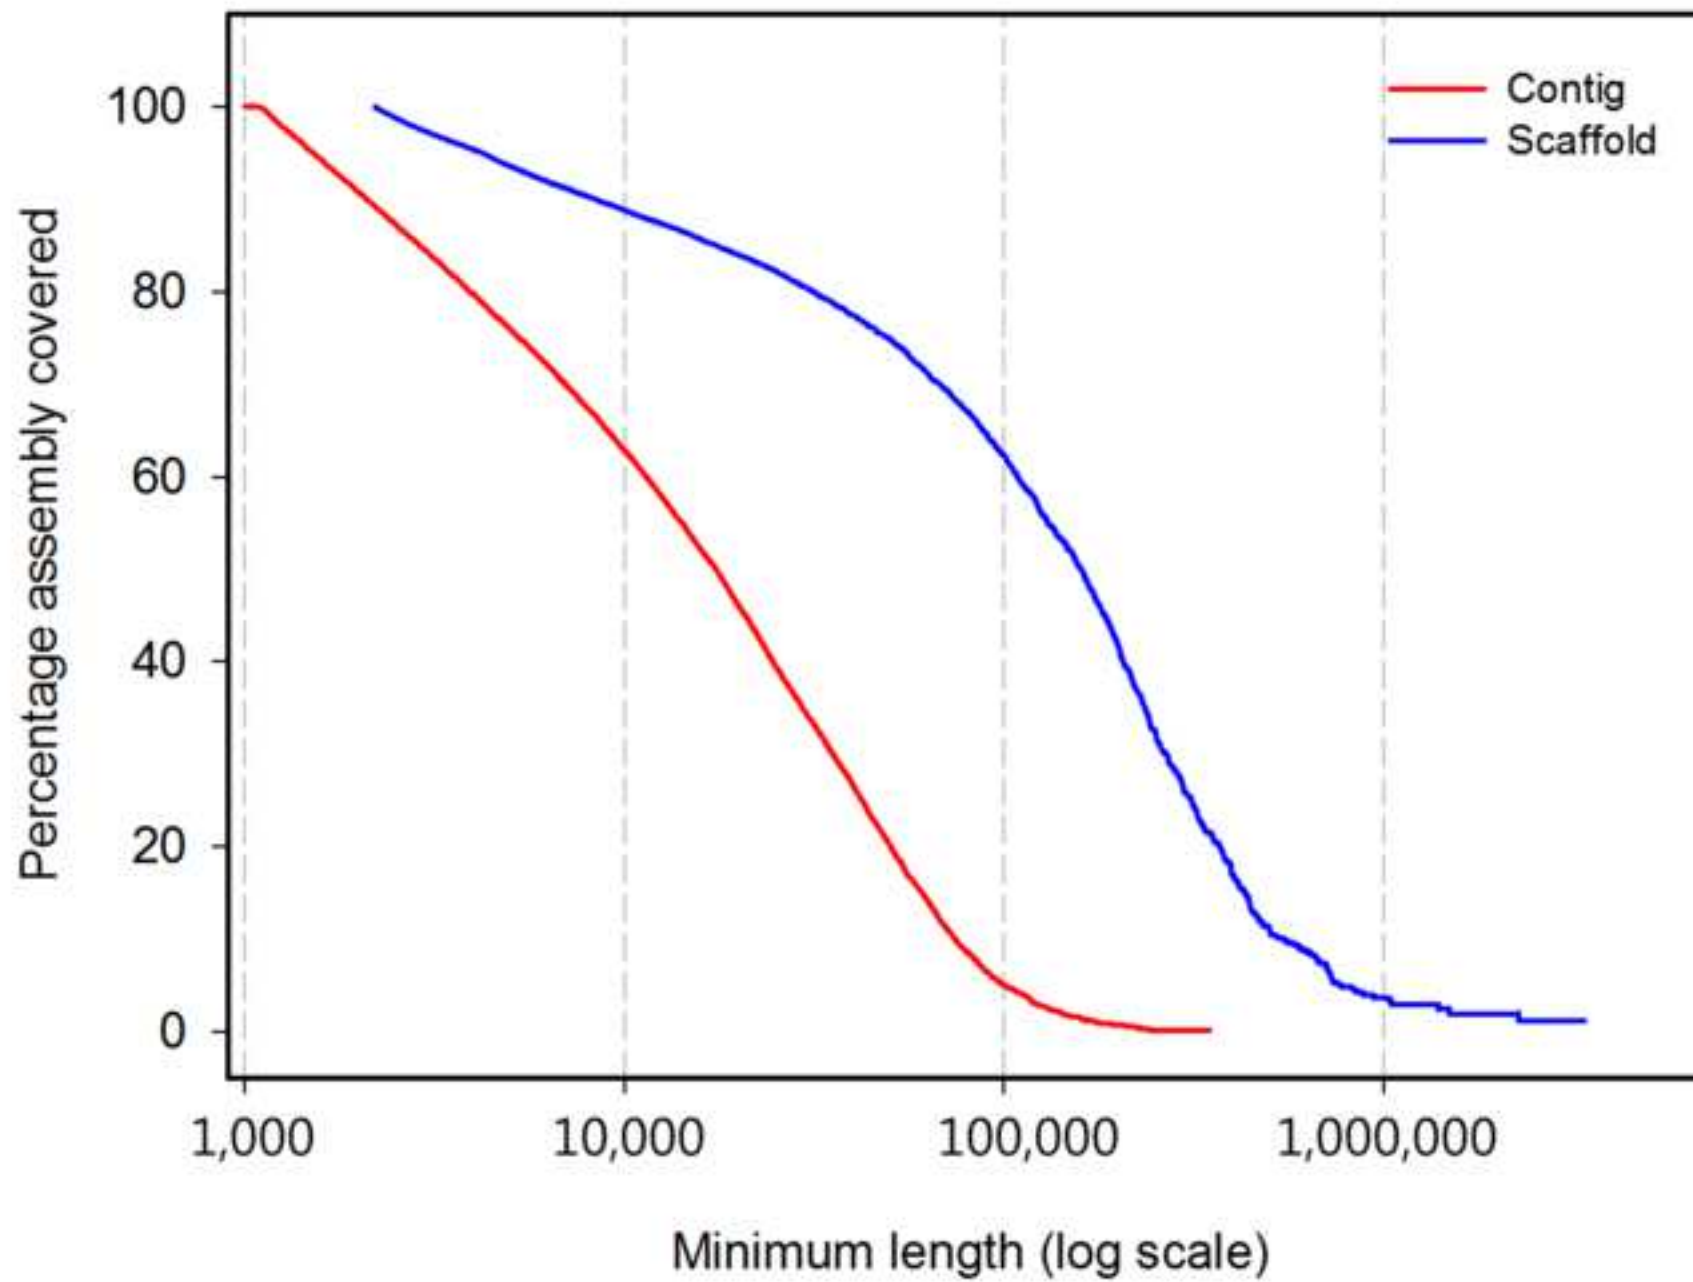

A

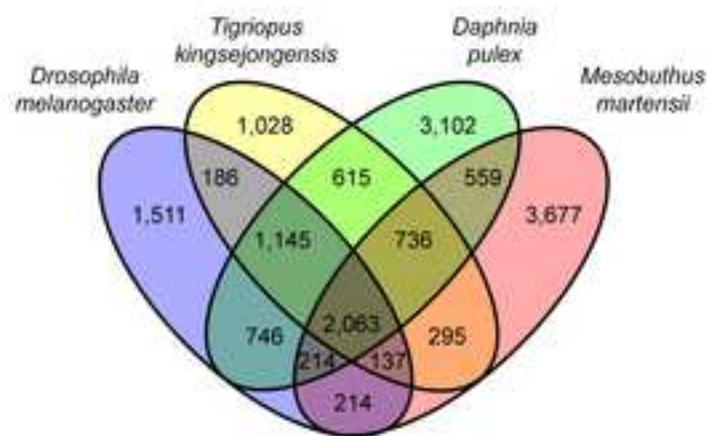

B

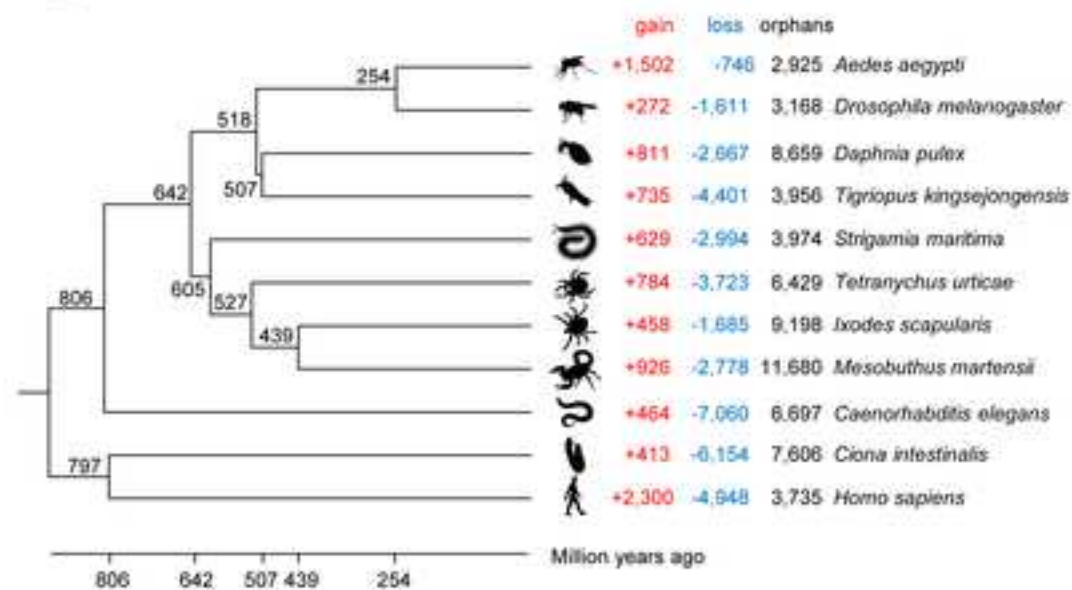

A

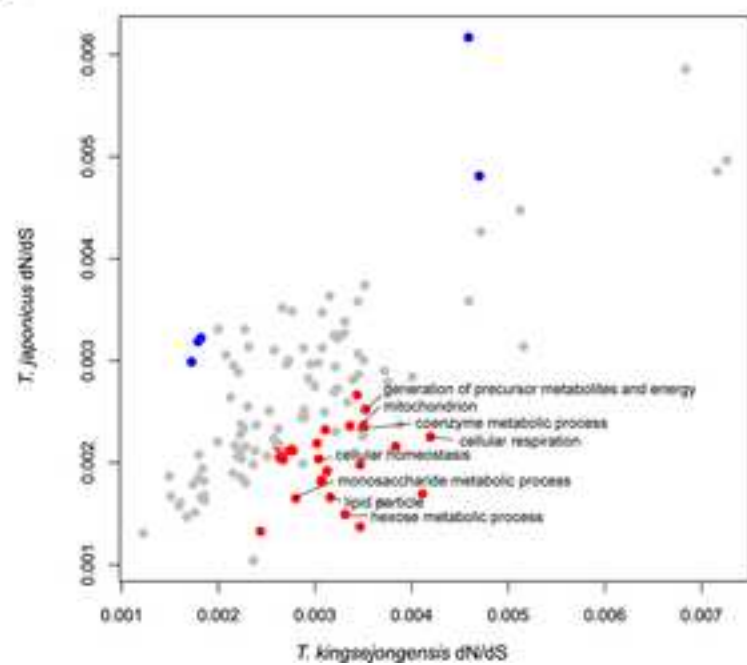

B

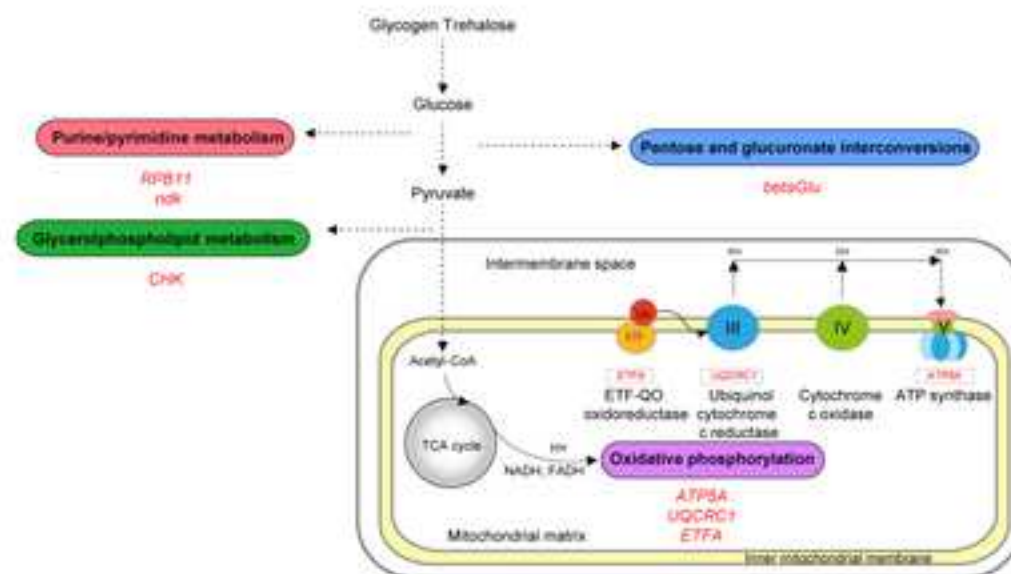

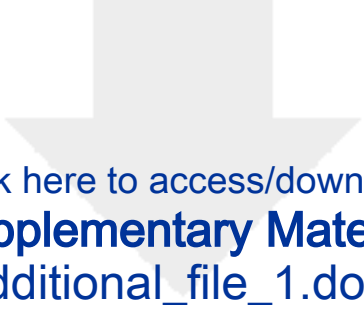

Click here to access/download  
**Supplementary Material**  
Additional\_file\_1.docx





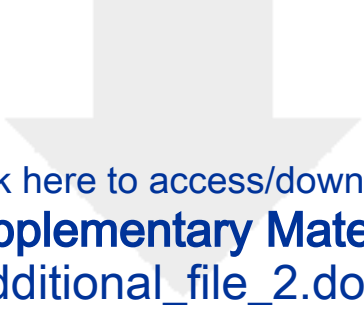

Click here to access/download  
**Supplementary Material**  
Additional\_file\_2.docx



Supplement: giw010_GIGA-D-16-00040_Revision_1.pdf [file giw010_GIGA-D-16-00040_Revision_1.pdf]
