# Supplementary material for: The genome of the Antarctic-endemic copepod, Tigriopus kingsejongensis
Source: PubMed Central journal article supplement (PMC5467011; doi:10.1093/gigascience/giw010), 2017-01-07

|                                                      |                                                                                                                                                                                                                                                                                                                                                                                                                                                                                                                                                                                                                                                                                                                                                                                                                                                                                                                                                                                                                                                                                                                                                                                                                                                                                                                                                                                                                                              |                |
|------------------------------------------------------|----------------------------------------------------------------------------------------------------------------------------------------------------------------------------------------------------------------------------------------------------------------------------------------------------------------------------------------------------------------------------------------------------------------------------------------------------------------------------------------------------------------------------------------------------------------------------------------------------------------------------------------------------------------------------------------------------------------------------------------------------------------------------------------------------------------------------------------------------------------------------------------------------------------------------------------------------------------------------------------------------------------------------------------------------------------------------------------------------------------------------------------------------------------------------------------------------------------------------------------------------------------------------------------------------------------------------------------------------------------------------------------------------------------------------------------------|----------------|
| <b>Manuscript Number:</b>                            | GIGA-D-16-00040R3                                                                                                                                                                                                                                                                                                                                                                                                                                                                                                                                                                                                                                                                                                                                                                                                                                                                                                                                                                                                                                                                                                                                                                                                                                                                                                                                                                                                                            |                |
| <b>Full Title:</b>                                   | The genome of Antarctic-endemic Copepod, <i>Tigriopus kingsejongensis</i>                                                                                                                                                                                                                                                                                                                                                                                                                                                                                                                                                                                                                                                                                                                                                                                                                                                                                                                                                                                                                                                                                                                                                                                                                                                                                                                                                                    |                |
| <b>Article Type:</b>                                 | Data Note                                                                                                                                                                                                                                                                                                                                                                                                                                                                                                                                                                                                                                                                                                                                                                                                                                                                                                                                                                                                                                                                                                                                                                                                                                                                                                                                                                                                                                    |                |
| <b>Funding Information:</b>                          | Korea Polar Research Institute (KR) (PE16070)                                                                                                                                                                                                                                                                                                                                                                                                                                                                                                                                                                                                                                                                                                                                                                                                                                                                                                                                                                                                                                                                                                                                                                                                                                                                                                                                                                                                | Dr. Hyun Park  |
|                                                      | Korea Polar Research Institute (PE14260)                                                                                                                                                                                                                                                                                                                                                                                                                                                                                                                                                                                                                                                                                                                                                                                                                                                                                                                                                                                                                                                                                                                                                                                                                                                                                                                                                                                                     | Dr Sanghee Kim |
| <b>Abstract:</b>                                     | <p>Background: The Antarctic intertidal zone is continuously subject to extreme fluctuations in biotic and abiotic stressors, and the West Antarctic Peninsula is the most rapidly warming region on earth. Organisms living in Antarctic intertidal pools are therefore of great interest for research on topics such as evolutionary adaptation to extreme environments and the effects of climate change.</p> <p>Findings: Here, we report the whole-genome sequence of the Antarctic endemic Harpacticoid copepod, <i>Tigriopus kingsejongensis</i> with a total of 37 Gb raw DNA sequence using Illumina Miseq platform and the libraries were prepared with 65-fold coverage with a total length of 295 Mb. The final assembly consists of 48,368 contigs with an N50 contig length of 17.5 kb and 27,823 scaffolds with N50 contig length of 159.2 kb and a total of 12,772 coding genes were inferred using the MAKER annotation pipeline approach. Comparative genome analysis revealed that <i>T. kingsejongensis</i> specific genes are enriched in transport and metabolism processes. Furthermore, rapidly evolving genes related to energy metabolism showed signatures of positive selection.</p> <p>Conclusions: The genome of <i>T. kingsejongensis</i> will provide an interesting example of an evolutionary strategy for Antarctic cold adaptation, and offers new genetic insights into Antarctic intertidal biota.</p> |                |
| <b>Corresponding Author:</b>                         | Hyun Park<br>KOREA, REPUBLIC OF                                                                                                                                                                                                                                                                                                                                                                                                                                                                                                                                                                                                                                                                                                                                                                                                                                                                                                                                                                                                                                                                                                                                                                                                                                                                                                                                                                                                              |                |
| <b>Corresponding Author Secondary Information:</b>   |                                                                                                                                                                                                                                                                                                                                                                                                                                                                                                                                                                                                                                                                                                                                                                                                                                                                                                                                                                                                                                                                                                                                                                                                                                                                                                                                                                                                                                              |                |
| <b>Corresponding Author's Institution:</b>           |                                                                                                                                                                                                                                                                                                                                                                                                                                                                                                                                                                                                                                                                                                                                                                                                                                                                                                                                                                                                                                                                                                                                                                                                                                                                                                                                                                                                                                              |                |
| <b>Corresponding Author's Secondary Institution:</b> |                                                                                                                                                                                                                                                                                                                                                                                                                                                                                                                                                                                                                                                                                                                                                                                                                                                                                                                                                                                                                                                                                                                                                                                                                                                                                                                                                                                                                                              |                |
| <b>First Author:</b>                                 | Seunghyun Kang                                                                                                                                                                                                                                                                                                                                                                                                                                                                                                                                                                                                                                                                                                                                                                                                                                                                                                                                                                                                                                                                                                                                                                                                                                                                                                                                                                                                                               |                |
| <b>First Author Secondary Information:</b>           |                                                                                                                                                                                                                                                                                                                                                                                                                                                                                                                                                                                                                                                                                                                                                                                                                                                                                                                                                                                                                                                                                                                                                                                                                                                                                                                                                                                                                                              |                |
| <b>Order of Authors:</b>                             | Seunghyun Kang                                                                                                                                                                                                                                                                                                                                                                                                                                                                                                                                                                                                                                                                                                                                                                                                                                                                                                                                                                                                                                                                                                                                                                                                                                                                                                                                                                                                                               |                |
|                                                      | Do-Hwan Ahn                                                                                                                                                                                                                                                                                                                                                                                                                                                                                                                                                                                                                                                                                                                                                                                                                                                                                                                                                                                                                                                                                                                                                                                                                                                                                                                                                                                                                                  |                |
|                                                      | Jun Hyuck Lee                                                                                                                                                                                                                                                                                                                                                                                                                                                                                                                                                                                                                                                                                                                                                                                                                                                                                                                                                                                                                                                                                                                                                                                                                                                                                                                                                                                                                                |                |
|                                                      | Sung Gu Lee                                                                                                                                                                                                                                                                                                                                                                                                                                                                                                                                                                                                                                                                                                                                                                                                                                                                                                                                                                                                                                                                                                                                                                                                                                                                                                                                                                                                                                  |                |
|                                                      | Seung Chul Shin                                                                                                                                                                                                                                                                                                                                                                                                                                                                                                                                                                                                                                                                                                                                                                                                                                                                                                                                                                                                                                                                                                                                                                                                                                                                                                                                                                                                                              |                |
|                                                      | Jungeun Lee                                                                                                                                                                                                                                                                                                                                                                                                                                                                                                                                                                                                                                                                                                                                                                                                                                                                                                                                                                                                                                                                                                                                                                                                                                                                                                                                                                                                                                  |                |
|                                                      | Gi-Sik Min                                                                                                                                                                                                                                                                                                                                                                                                                                                                                                                                                                                                                                                                                                                                                                                                                                                                                                                                                                                                                                                                                                                                                                                                                                                                                                                                                                                                                                   |                |
|                                                      | Hyoungseok Lee                                                                                                                                                                                                                                                                                                                                                                                                                                                                                                                                                                                                                                                                                                                                                                                                                                                                                                                                                                                                                                                                                                                                                                                                                                                                                                                                                                                                                               |                |
|                                                      | Hyun-Woo Kim                                                                                                                                                                                                                                                                                                                                                                                                                                                                                                                                                                                                                                                                                                                                                                                                                                                                                                                                                                                                                                                                                                                                                                                                                                                                                                                                                                                                                                 |                |
|                                                      | Sanghee Kim                                                                                                                                                                                                                                                                                                                                                                                                                                                                                                                                                                                                                                                                                                                                                                                                                                                                                                                                                                                                                                                                                                                                                                                                                                                                                                                                                                                                                                  |                |
|                                                      | Hyun Park                                                                                                                                                                                                                                                                                                                                                                                                                                                                                                                                                                                                                                                                                                                                                                                                                                                                                                                                                                                                                                                                                                                                                                                                                                                                                                                                                                                                                                    |                |

|                                                                                                                                                                                                                                   |                                                                                                                                                                                                                                                                                                                                                                                                                                                                                                                                                                                                                                                                                                                                                                                                                                                                                                                                                                                                                                                                                                                                                                                                                                                                                                                                                                                                                                                                                                                                                                                                                                                                                                                                                                                                                                                                                                                                                                                                                                                                                                                                                                                                                                                                                                                                                                                                                                                                                                                                                                                                                                                                                                                            |
|-----------------------------------------------------------------------------------------------------------------------------------------------------------------------------------------------------------------------------------|----------------------------------------------------------------------------------------------------------------------------------------------------------------------------------------------------------------------------------------------------------------------------------------------------------------------------------------------------------------------------------------------------------------------------------------------------------------------------------------------------------------------------------------------------------------------------------------------------------------------------------------------------------------------------------------------------------------------------------------------------------------------------------------------------------------------------------------------------------------------------------------------------------------------------------------------------------------------------------------------------------------------------------------------------------------------------------------------------------------------------------------------------------------------------------------------------------------------------------------------------------------------------------------------------------------------------------------------------------------------------------------------------------------------------------------------------------------------------------------------------------------------------------------------------------------------------------------------------------------------------------------------------------------------------------------------------------------------------------------------------------------------------------------------------------------------------------------------------------------------------------------------------------------------------------------------------------------------------------------------------------------------------------------------------------------------------------------------------------------------------------------------------------------------------------------------------------------------------------------------------------------------------------------------------------------------------------------------------------------------------------------------------------------------------------------------------------------------------------------------------------------------------------------------------------------------------------------------------------------------------------------------------------------------------------------------------------------------------|
| <b>Order of Authors Secondary Information:</b>                                                                                                                                                                                    |                                                                                                                                                                                                                                                                                                                                                                                                                                                                                                                                                                                                                                                                                                                                                                                                                                                                                                                                                                                                                                                                                                                                                                                                                                                                                                                                                                                                                                                                                                                                                                                                                                                                                                                                                                                                                                                                                                                                                                                                                                                                                                                                                                                                                                                                                                                                                                                                                                                                                                                                                                                                                                                                                                                            |
| <b>Response to Reviewers:</b>                                                                                                                                                                                                     | <p>GIGA-D-16-00040<br/>The genome of Antarctic-endemic Copepod, <i>Tigriopus kingsejongensis</i><br/>Seunghyun Kang; Do-Hwan Ahn; Jun Hyuck Lee; Sung Gu Lee; Seung Chul Shin;<br/>Jungeun Lee; Gi-Sik Min; Hyoungseok Lee; Hyun-Woo Kim; Sanghee Kim; Hyun Park<br/>GigaScience</p> <p>Dear Hans,</p> <p>We would like to thank you and the reviewers for your kind help to revise our manuscript and consider our manuscript for publication in GigaScience. We appreciated all of the comments and suggestions and carefully considered all of them during the revision. All of inferred statements have been corrected and we have included the photo of the specimen as a main figure as you suggested. The corrected points were marked in blue color in revised manuscript.</p> <p>We did our best to address the comments from the reviewers. Hope the revised is acceptable for publication. We look forward to hearing your decision.</p> <p>Thanks and best regards.</p> <p>Reviewer reports:<br/>Reviewer #1: This paper is in reasonably good shape and the data will be useful for comparison to temperate <i>Tigriopus</i>. My only remaining comment is that the coverage of the CEGMA is relatively low and I don't know how that impacts the estimates of turnover in gene families (which the authors estimate to be quite high). Could this be a result of the fact that the assembly is missing a sizable proportion of core eukaryotic genes?</p> <p>Response) We have added table 6 which summarizes genome completeness reports of <i>T. kingsejongensis</i> and other arthropod genomes used in gene family assignments. Overall, non-insect arthropod genomes showed relatively low CEGMA and BUSCO assignment scores. This tendency is commonly observed in non-insect genomes [1, 2] because the gene sets are mainly made of widely studied insect genomes. In "Annotation" and "Gene Families" part (which is in blue color), we made comment about this tendency and need to be careful to examine gene turnover events in non-insect arthropod genomes. Finally, we remarked necessity of globally approved arthropod orthologous gene sets to the field.</p> <p>1.Hoy M, Waterhouse R, Wu K, Estep A, Ioannidis P, Palmer W, Pomerantz A, Simão F, Thomas J, Jiggins F: Genome sequencing of the phytoseiid predatory mite <i>Metaseiulus occidentalis</i> reveals completely atomised Hox genes and super-dynamic intron evolution. <i>Genome biology and evolution</i> 2016.</p> <p>2.Simão FA, Waterhouse RM, Ioannidis P, Kriventseva EV, Zdobnov EM: BUSCO: assessing genome assembly and annotation completeness with single-copy orthologs. <i>Bioinformatics</i> 2015:btv351.</p> |
| <b>Additional Information:</b>                                                                                                                                                                                                    |                                                                                                                                                                                                                                                                                                                                                                                                                                                                                                                                                                                                                                                                                                                                                                                                                                                                                                                                                                                                                                                                                                                                                                                                                                                                                                                                                                                                                                                                                                                                                                                                                                                                                                                                                                                                                                                                                                                                                                                                                                                                                                                                                                                                                                                                                                                                                                                                                                                                                                                                                                                                                                                                                                                            |
| <b>Question</b>                                                                                                                                                                                                                   | <b>Response</b>                                                                                                                                                                                                                                                                                                                                                                                                                                                                                                                                                                                                                                                                                                                                                                                                                                                                                                                                                                                                                                                                                                                                                                                                                                                                                                                                                                                                                                                                                                                                                                                                                                                                                                                                                                                                                                                                                                                                                                                                                                                                                                                                                                                                                                                                                                                                                                                                                                                                                                                                                                                                                                                                                                            |
| Are you submitting this manuscript to a special series or article collection?                                                                                                                                                     | No                                                                                                                                                                                                                                                                                                                                                                                                                                                                                                                                                                                                                                                                                                                                                                                                                                                                                                                                                                                                                                                                                                                                                                                                                                                                                                                                                                                                                                                                                                                                                                                                                                                                                                                                                                                                                                                                                                                                                                                                                                                                                                                                                                                                                                                                                                                                                                                                                                                                                                                                                                                                                                                                                                                         |
| <b>Experimental design and statistics</b>                                                                                                                                                                                         | Yes                                                                                                                                                                                                                                                                                                                                                                                                                                                                                                                                                                                                                                                                                                                                                                                                                                                                                                                                                                                                                                                                                                                                                                                                                                                                                                                                                                                                                                                                                                                                                                                                                                                                                                                                                                                                                                                                                                                                                                                                                                                                                                                                                                                                                                                                                                                                                                                                                                                                                                                                                                                                                                                                                                                        |
| Full details of the experimental design and statistical methods used should be given in the Methods section, as detailed in our <a href="#">Minimum Standards Reporting Checklist</a> . Information essential to interpreting the |                                                                                                                                                                                                                                                                                                                                                                                                                                                                                                                                                                                                                                                                                                                                                                                                                                                                                                                                                                                                                                                                                                                                                                                                                                                                                                                                                                                                                                                                                                                                                                                                                                                                                                                                                                                                                                                                                                                                                                                                                                                                                                                                                                                                                                                                                                                                                                                                                                                                                                                                                                                                                                                                                                                            |

|                                                                                                                                                                                                                                                                                                                                                                                                                                                                                                                                                         |            |
|---------------------------------------------------------------------------------------------------------------------------------------------------------------------------------------------------------------------------------------------------------------------------------------------------------------------------------------------------------------------------------------------------------------------------------------------------------------------------------------------------------------------------------------------------------|------------|
| <p>data presented should be made available in the figure legends.</p> <p>Have you included all the information requested in your manuscript?</p>                                                                                                                                                                                                                                                                                                                                                                                                        |            |
| <p><b>Resources</b></p> <p>A description of all resources used, including antibodies, cell lines, animals and software tools, with enough information to allow them to be uniquely identified, should be included in the Methods section. Authors are strongly encouraged to cite <a href="#">Research Resource Identifiers</a> (RRIDs) for antibodies, model organisms and tools, where possible.</p> <p>Have you included the information requested as detailed in our <a href="#">Minimum Standards Reporting Checklist</a>?</p>                     | <p>Yes</p> |
| <p><b>Availability of data and materials</b></p> <p>All datasets and code on which the conclusions of the paper rely must be either included in your submission or deposited in <a href="#">publicly available repositories</a> (where available and ethically appropriate), referencing such data using a unique identifier in the references and in the “Availability of Data and Materials” section of your manuscript.</p> <p>Have you have met the above requirement as detailed in our <a href="#">Minimum Standards Reporting Checklist</a>?</p> | <p>Yes</p> |

[Click here to view linked References](#)

1       **The genome of Antarctic-endemic Copepod, *Tigriopus***  
2  
3  
4       ***kingsejongensis***  
5  
6  
7  
8  
9

10       Seunghyun Kang<sup>1¶</sup>, Do-Hwan Ahn<sup>1¶</sup>, Jun Hyuck Lee<sup>1,2</sup>, Sung Gu Lee<sup>1,2</sup>, Seung Chul Shin<sup>1</sup>,  
11  
12       Jungeun Lee<sup>1</sup>, Gi-Sik Min<sup>3</sup>, Hyoungseok Lee<sup>1</sup>, Hyun-Woo Kim<sup>4\*&</sup>, Sanghee Kim<sup>5\*&</sup> & Hyun  
13  
14       Park<sup>1,2\*&</sup>  
15  
16  
17  
18  
19

20       <sup>1</sup> Unit of Polar Genomics, Korea Polar Research Institute, Yeonsu-gu, Incheon, South Korea  
21

22       <sup>2</sup> Polar Sciences, University of Science & Technology, Yuseong-gu, Daejeon, South Korea  
23

24       <sup>3</sup> Department of Biological Sciences, Inha University, Incheon, South Korea  
25  
26

27       <sup>4</sup> Department of Marine Biology, Pukyong National University, Busan, South Korea  
28

29       <sup>5</sup> Division of Polar Life Sciences, Korea Polar Research Institute, Yeonsu-gu, Incheon, South  
30  
31       Korea  
32

33  
34       \* Corresponding author  
35

36  
37       E-mail: kimhw@pknu.ac.kr; sangheekim@kopri.re.kr; hpark@kopri.re.kr  
38

39       ¶These authors contributed equally to this work.  
40

41       &These authors also contributed equally to this work.  
42  
43  
44  
45  
46  
47  
48  
49  
50  
51  
52  
53  
54  
55  
56  
57  
58  
59  
60  
61  
62  
63  
64  
65

1 **Abstract**  
2  
3

4 **Background:** The Antarctic intertidal zone is continuously subject to extreme fluctuations in  
5  
6 biotic and abiotic stressors, and the West Antarctic Peninsula is the most rapidly warming  
7  
8 region on earth. Organisms living in Antarctic intertidal pools are therefore of great interest for  
9  
10 research on topics such as evolutionary adaptation to extreme environments and the effects of  
11  
12 climate change.  
13  
14

15  
16 **Findings:** Here, we report the whole-genome sequence of the Antarctic endemic Harpacticoid  
17  
18 copepod, *Tigriopus kingsejongensis* with a total of 37 Gb raw DNA sequence using Illumina  
19  
20 Miseq platform and the libraries were prepared with 65-fold coverage with a total length of  
21  
22 295 Mb. The final assembly consists of 48,368 contigs with an N50 contig length of 17.5 kb  
23  
24 and 27,823 scaffolds with N50 contig length of 159.2 kb and a total of 12,772 coding genes  
25  
26 were inferred using the MAKER annotation pipeline approach. Comparative genome analysis  
27  
28 revealed that *T. kingsejongensis* specific genes are enriched in transport and metabolism  
29  
30 processes. Furthermore, rapidly evolving genes related to energy metabolism showed  
31  
32 signatures of positive selection.  
33  
34  
35  
36  
37

38  
39 **Conclusions:** The genome of *T. kingsejongensis* will provide an interesting example of an  
40  
41 evolutionary strategy for Antarctic cold adaptation, and offers new genetic insights into  
42  
43 Antarctic intertidal biota.  
44  
45

46  
47 **Keywords:** Copepoda, Genome, Antarctic, adaptation, *Tigriopus*  
48  
49  
50  
51  
52  
53  
54  
55  
56  
57  
58  
59  
60  
61  
62  
63  
64  
65

## Data description

The subclass copepods are very diverse and approximately 12,000 copepod species have been described [1, 2]. They dominate the zooplankton community contributing about 70% of total zooplankton biomass [3] and play an important role in the marine meiobenthic food web linking between the phytoplankton and higher trophic levels [4]. Harpacticoid copepods of the genus *Tigriopus* Norman 1868 are dominant members of shallow supratidal rock pools worldwide. They are distributed among habitats that vary widely in salinity, temperature, desiccation risk, and UV radiation, and have been used as a model system to investigate topics such as osmoregulation [5], temperature adaptation [6, 7] and environmental toxicology [8]. As the genome resources of copepods has been publically available (*Tigriopus californicus* [[http://i5k.nal.usda.gov/Tigriopus\\_californicus](http://i5k.nal.usda.gov/Tigriopus_californicus)], *Tigriopus japonicus* [9], *Eurytemora affinis* [[http://i5k.nal.usda.gov/Eurytemora\\_affinis](http://i5k.nal.usda.gov/Eurytemora_affinis)] and salmon louse *Lepeophtheirus salmonis* [<http://sealouse.imr.no/>]), now it is possible to explore their fundamental biological processes and physiological responses to diverse environments.

Antarctica provides not only an extreme habitat for extant organisms, but also a model for research on evolutionary adaptations to cold environments [10, 11]. The Antarctic intertidal zone, particularly in the Western Antarctic Peninsula region, is one of the most extreme environments on earth. It also serves as a potential barometer for global climate changes, since it is the fastest-warming region on earth [12]. Antarctic intertidal species that have evolved stenothermal phenotypes through adaptation to a year-round climate of extreme cold may now face extinction by global warming. The response of these species to further warming in Western Antarctica is of serious concern; however, to date there have been few studies focusing on species from the Antarctic intertidal zone.

*Tigriopus kingsejongensis* was first found and recognized as a new endemic species in a rock pool in the Antarctic Peninsula, and is extremely cold-tolerant and can survive in frozen sea

1 water [13]. We observed the morphological differences, such as increased numbers of caudal  
2  
3  
4 setae in nauplii, optimal growth temperature (ca. 8°C) and developmental characteristics have  
5  
6 been compared to those of the congener *Tigriopus japonicus*, which is found in the coastal area  
7  
8 of the Yellow Sea. *Tigriopus kingsejongensis* has evolved to overcome the unique  
9  
10 environmental constraints of Antarctica, and therefore provides an ideal experimental model for  
11  
12 all aspects of research on extreme habitats. This species may represent a case of rapid  
13  
14 speciation, since the intertidal zone on King George Island and surrounding areas did not exist  
15  
16 before 10,000 years ago [14]. *Tigriopus kingsejongensis* likely evolved as a distinct species  
17  
18 within this relatively short time period. Thus, inter- and intraspecies comparative analyses of  
19  
20 Antarctic *Tigriopus* species will help define the trajectory of adaptation to the Antarctic  
21  
22 environment and also provide insights into the genetic basis of *Tigriopus* divergence and  
23  
24 evolution.  
25  
26  
27  
28  
29  
30  
31

### 32 **Library construction and sequencing**

33  
34

35 *Tigriopus kingsejongensis* were collected from tidal pools in Potter Cove, near King  
36  
37 Sejong Station, on the northern Antarctic Peninsula (62°14'S, 58°47'W) (Fig. 1 and Fig. S1 in  
38  
39 additional file1) in January 2013 with a hand-nets. Water temperatures were  $1.6 \pm 0.8^\circ\text{C}$  during  
40  
41 this month. High-molecular-weight genomic DNA from pooled *T. kingsejongensis* was  
42  
43 extracted using the DNeasy Blood & Tissue Kit (Qiagen). For Illumina Miseq sequencing, four  
44  
45 library types were constructed with 350, 400, 450, and 500 bp for paired-end libraries, and 3  
46  
47 kb and 8 kb for mate-pair libraries, prepared using the standard Illumina sample preparation  
48  
49 methods (Table 1). All sequencing processes were performed according to the manufacturer's  
50  
51 instructions (Illumina).  
52  
53  
54  
55  
56

57 RNA was prepared from pooled *T. kingsejongensis* and *Tigriopus japonicus* specimens  
58  
59 from two different temperature experiments (4°C and 15°C) using the RNeasy Mini Kit  
60  
61  
62  
63  
64  
65

1 (Qiagen). For Illumina Miseq sequencing, subsequent experiments were carried out under the  
2  
3 manufacturer's instructions (Illumina). The *de novo* transcriptome assembly was performed  
4  
5 with CLC Genomics Workbench, setting the minimum allowed contig length to 200  
6  
7 nucleotides. The assembly process generated 40,172 contigs with a max length of 23,942 bp  
8  
9 and an N50 value of 1,093 bp. These generated contigs were used as reference sequences for  
10  
11 mapping of trimmed reads, and fold changes in expression for each gene were calculated with  
12  
13 a significance threshold of  $P \leq 0.05$  using CLC Genomics Workbench (Table 2 and 3).  
14  
15  
16  
17  
18  
19  
20  
21

## 22 **Genome assembly**

23  
24

25 First, k-mer analysis was conducted using jellyfish 2.2.5 [15] to estimate the genome  
26  
27 size from DNA paired-end libraries. The estimated genome size was 298 Mb with main peak  
28  
29 at a depth of ~39x (Fig. 2). Then, assemblies were performed using a Celera Assembler with  
30  
31 Illumina short reads [16]. Prior to assembly, Illumina reads were trimmed using the FASTX-  
32  
33 Toolkit ([http://hannonlab.cshl.edu/fastx\\_toolkit](http://hannonlab.cshl.edu/fastx_toolkit)) with parameters -t 20, -l 70 and -Q 33, after  
34  
35 which a paired sequence from trimmed Illumina reads was selected. Finally, trimmed Illumina  
36  
37 reads with 65-fold coverage (insert sizes 350, 400, 450, and 500 bp) were obtained and  
38  
39 converted to the FRG file format (required by the Celera assembler) using FastqToCA.  
40  
41 Assembly was performed on a 96-processor workstation with Intel Xeon X7460 2.66 GHz  
42  
43 processors and 1 terabyte RAM with the following parameters: overlapper = ovl, unitigger =  
44  
45 bogart, utgGraphErrorRate = 0.03, utgGraphErrorLimit = 2.5, utgMergeErrorRate = 0.030,  
46  
47 utgMergeErrorLimit = 3.25, ovlErrorRate = 0.1, cnsErrorRate = 0.1, cgwErrorRate = 0.1,  
48  
49 merSize = 22, and doOverlapBasedTrimming = 1. The initial Celera assembly had a total size  
50  
51 of 305 Mb, N50 contig size of 17,566 bp, and max contig size of 349.5 kb. Scaffolding was  
52  
53 completed using the software SSPACE 2.0 scaffolder using mate-paired data [17].  
54  
55  
56  
57  
58  
59  
60  
61  
62  
63  
64  
65



1 Subsequently, we closed gaps using Gapfiller Ver.1.9 software with 65× trimmed Illumina  
2 reads with default settings [18]. *De novo* assembly of 203 million reads from paired-end  
3 libraries and mate-paired libraries yielded a draft assembly (65-fold coverage) with a total  
4 length of 295 Mb, and contig and scaffold N50 sizes of 17.6 kb and 159.2 kb, respectively  
5 (Table 4 and Fig. 3).  
6  
7  
8  
9  
10  
11  
12

## 13 **Annotation**

14  
15 We used MAKER for genome annotation [19]. MAKER is a portable and easily  
16 configurable genome annotation pipeline. MAKER first identified repetitive elements using  
17 RepeatMasker [20]. This masked genome sequence was used for *ab initio* gene prediction with  
18 SNAP software [21], after which alignment of expressed sequence tags with BLASTn and  
19 protein information from tBLASTx were included. We used the *de novo* repeat library of *T.*  
20 *kingsejongensis* from RepeatModeler for RepeatMasker; proteins from five species with data  
21 from *D. melanogaster*, *D. pulex*, *T. japonicus*, and *Tigriopus californicus* were included in the  
22 analysis. RNA-seq-based gene prediction was performed by aligning all RNA-seq data against  
23 the assembled genome using TopHat [22], and Cufflinks [23] was used to predict cDNAs from  
24 the resultant data. Next, MAKER polished the alignments using the program Exonerate [24],  
25 which provided integrated information to synthesize SNAP annotation. MAKER then selected  
26 and revised the final gene model considering all information. A total of 12,772 genes were  
27 predicted using MAKER in *T. kingsejongensis*. Annotated genes contained an average of 4.6  
28 exons, with an average mRNA length of 1,090 bp. Additionally, 12,562 of 12,772 genes were  
29 assigned preliminary functions based on automated annotation using Blast2GO (Ver. 2.6.0)  
30 [25] (Fig. S2 and S3 in additional file 1). The Infernal software package (Ver. 1.1) [26] and  
31 covariance models (CMs) from the Rfam database [27] were used to identify other non-coding  
32 RNAs in the *T. kingsejongensis* scaffold. We identified putative tRNA genes using tRNAscan-  
33  
34  
35  
36  
37  
38  
39  
40  
41  
42  
43  
44  
45  
46  
47  
48  
49  
50  
51  
52  
53  
54  
55  
56  
57  
58  
59  
60  
61  
62  
63  
64  
65

1 SE [28] (Table S1 in additional file 2). tRNAscan-SE uses a covariance model (CM) that scores  
2  
3 candidates based on their sequence and predicted secondary structures.  
4

5  
6 Non-gap sequences occupied 284.8 Mb (96.5%), and simple sequence repeats (SSRs)  
7  
8 were 1.2 Mb (0.4%) in total (Table S2 in additional file 2). Transposable elements (TEs)  
9  
10 comprised 6.5 Mb, which is roughly 2.3% of the assembled genome (Table S2 and S3 in  
11  
12 additional file 2). On the basis of homology and *ab initio* gene prediction, we found that the  
13  
14 genome of *T. kingsejongensis* contains 12,772 protein-coding genes (Table 5). By assessing  
15  
16 the quality of the annotated 12,772 gene models, we found that 11,686 protein-coding genes  
17  
18 (91.5%) were supported by the RNA-seq data, of which, 7,325 (63%) showed similarity to  
19  
20 proteins from other species. To estimate genome assembly and annotation completeness, we  
21  
22 have used both Analysis of Core Eukaryotic Genes Mapping Approach (CEGMA) [29] and  
23  
24 Benchmarking Universal Single-Copy Orthologs (BUSCO) [30] (Table 6). CEGMA report  
25  
26 showed that 193 of 248 CEGMA score genes were fully annotated (77.8 % completeness) and  
27  
28 206 of 248 genes were partially annotated (83 % completeness). The similar approach BUSCO  
29  
30 assessment employ lineage-specific profiles libraries such as eukaryotes, metazoans, and  
31  
32 arthropods. BUSCO analysis showed that the genome assembly contains 71 % of complete and  
33  
34 6 % of partial Metazoan orthologous gene set. The BUSCO reports using arthropod gene set  
35  
36 assigned poorly the most which contained 61.1% complete genes and 10.7 % partial genes. The  
37  
38 CEGMA and BUSCO gene set were largely made of insects and the other non-insect arthropod  
39  
40 genomes obtained similar low assignment scores. Overall, genome completeness reports  
41  
42 revealed moderately complete *T. kingsejongensis* genome in non-dipteran arthropod genomes.  
43  
44  
45  
46  
47  
48  
49  
50  
51

## 52 **Gene families**

53  
54 The orthologous groups were identified from 11 species (*T. kingsejongensis*, *Aedes*  
55  
56 *aegypti*, *D. melanogaster*, *Ixodes scapularis*, *M. martensii*, *Strigamia martima*, *Tetranychus*  
57  
58  
59  
60  
61  
62  
63  
64  
65

1 *urticae*, *D. pulex*, *Homo sapiens*, *Ciona intestinalis*, and *Caenorhabditis elegans*) (Table 7)  
2  
3 using OrthoMCL [32] with standard parameters and options, and transcript variants other than  
4  
5 the longest translation forms were removed. For *T. kingsejongensis*, the coding sequence from  
6  
7 the MAKER annotation pipeline was used. The 1:1:1 single-copy orthologous genes were  
8  
9 subjected to phylogenetic construction and divergence time estimation. Protein-coding genes  
10  
11 were aligned using PRANK with the codon alignment option [33], and poorly aligned  
12  
13 sequences with gaps were removed using Gblock under the codon model [34]. We constructed  
14  
15 a maximum-likelihood phylogenetic tree using RAxML with 1,000 bootstrap values [35] and  
16  
17 calibrated the divergence time between species with TimeTree [36]. Finally, the average gene  
18  
19 gain/loss rate along the given phylogeny was identified using the program CAFÉ 3.1 [37]. We  
20  
21 constructed orthologous gene clusters using four arthropod species (Antarctic copepod, *T.*  
22  
23 *kingsejongensis*; scorpion, *Mesobuthus martensii*; fruit fly, *Drosophila melanogaster* and  
24  
25 water flea, *Daphnia pulex*) to compare the genomic features and the adaptive divergence in the  
26  
27 arthropods. In total, 2,063 gene families are shared by all four species, and 1,028 genes are  
28  
29 specific to the Antarctic copepod. *Tigriopus kingsejongensis* shares 4,559 (73.5%) gene  
30  
31 families with *D. pulex*, which belongs to the same crustacean lineage Vericrustacea, 3,531  
32  
33 (56.9%) with *D. melanogaster*, and 3,231 (52.1%) with *M. martensii* (Fig. 4A). Gene ontology  
34  
35 (GO) analysis revealed that the 1,028 *T. kingsejongensis*-specific genes are enriched in  
36  
37 transport (single-organism transport, GO: 0044765; transmembrane transport, GO: 0055085;  
38  
39 ion transport, GO: 0006811; cation transport, GO: 0006812) and single-organism metabolic  
40  
41 processes (GO: 0044710) (Table S4 and S5 in additional file 2). Subsequently, we performed  
42  
43 gene gain-and-loss analysis on 11 representative species, and found that *T. kingsejongensis*  
44  
45 gained 735 gene families and lost 4,401 gene families (Fig. 4B). This species exhibits a gene  
46  
47 family turnover of 5,136, the largest value among the eight arthropods. The second largest  
48  
49 value was obtained from *T. uticae* and the third was obtained from *M. martensii*. In table 6,  
50  
51  
52  
53  
54  
55  
56  
57  
58  
59  
60  
61  
62  
63  
64  
65

1 non-insect arthropod genomes were relatively poorly assigned with CEGMA or BUSCO sets.  
2  
3 These gene sets are largely based on insects in arthropods and the assignment reports have  
4  
5 tendency to have low assignment scores in non-insect or -dipteran genomes [30, 38, 39]. This  
6  
7 implies that we need to carefully examine the gene family turnover in non-insect arthropod  
8  
9 genomes and require globally approved arthropod orthologous gene sets.  
10  
11

12  
13  
14 We also analyzed expansion and contraction of the gene families (Table S6-S9 in  
15  
16 additional file 2), and found 232 significantly expanded gene families in *T. kingsejongensis*;  
17  
18 these gene families are significantly overrepresented in amino acid metabolism and  
19  
20 carbohydrate metabolism in KEGG metabolic pathways.  
21  
22  
23  
24  
25  
26  
27

## 28 29 **Genome evolution**

30  
31  
32 Adaptive functional divergence caused by natural selection is commonly estimated  
33  
34 based on the ratio of nonsynonymous ( $dN$ ) to synonymous ( $dS$ ) mutations. To estimate  $dN$ ,  $dS$ ,  
35  
36 and average  $dN/dS$  ratio ( $w$ ), and lineage-specific PSGs in *T. kingsejongensis* and *T. japonicus*,  
37  
38 protein-coding genes from *T. japonicus* were added to define orthologous gene families among  
39  
40 the four species (*T. kingsejongensis*, *T. japonicus*, *D. pulex*, and *D. melanogaster*) using the  
41  
42 program OrthoMCL with the same conditions previously described. We identified 2,937  
43  
44 orthologous groups shared by all four species, and single-copy gene families were used to  
45  
46 construct a phylogenetic tree and estimate the time since divergence using the same methods  
47  
48 described above. Each of the identified orthologous genes was aligned using the PRANK, and  
49  
50 poorly aligned sequences with gaps were removed using Gblock. Alignments showing less than  
51  
52 40% identity and genes shorter than 150 bp were eliminated in subsequent procedures. The  
53  
54 values of  $dN$ ,  $dS$  and  $w$  were estimated from each gene using the Codeml program implemented  
55  
56  
57  
58  
59  
60  
61  
62  
63  
64  
65

1 in the PAML package with the free-ratio model [40] under F3X4 codon frequencies, and  
2  
3 orthologs with  $w \leq 5$  and  $dS \leq 3$  were retained [41]. To examine the accelerated  
4  
5 nonsynonymous divergence in either *T. kingsejongensis* or *T. japonicus* lineage, a binomial  
6  
7 test [42] was used to determine GO categories with at least 20 orthologous genes. To define  
8  
9 PSGs in *T. kingsejongensis* and *T. japonicus*, we applied basic and branch-site models, and  
10  
11 Likelihood Ratio Tests (LRTs) were used to remove genes under relaxation of selective  
12  
13 pressure. To investigate which functional categories and pathways were enriched in the PSGs,  
14  
15 we performed DAVID Functional Annotation [43] with Fisher's exact test (cutoff:  $P \leq 0.05$ ).  
16  
17  
18  
19  
20  
21

22 The average  $w$  value from 2,937 co-orthologous genes of *T. kingsejongensis* (0.0027)  
23  
24 is higher than that of *T. japonicus* (0.0022). The GO categories that showing evidence of  
25  
26 accelerated evolution in *T. kingsejongensis* are energy metabolism (generation of precursor  
27  
28 metabolites and energy, GO: 0006091; cellular respiration, GO: 0045333) and carbohydrate  
29  
30 metabolism (monosaccharide metabolic process, GO: 0005996; hexose metabolic process, GO:  
31  
32 0019318) (Fig. 5A, Table S10 in Additional file 2). Branch-site model analysis showed that  
33  
34 the genes belonging to the functional categories above have undergone a significant positive  
35  
36 selection process by putative functional divergence in certain lineages. There are 74 and 79  
37  
38 positively selected genes (PSGs) in *T. kingsejongensis* (Table S11 in Additional file 2) and *T.*  
39  
40 *japonicus* (Table S12 in Additional file 2), respectively. The functional categories enriched in  
41  
42 *T. kingsejongensis*, when compared to *T. japonicus*, support the idea that the functional  
43  
44 divergence in *T. kingsejongensis* is strongly related to energy metabolism (oxidative  
45  
46 phosphorylation, GO: 0006119; energy-coupled proton transport down electrochemical  
47  
48 gradient, GO: 0015985; ATP synthesis-coupled proton transport, GO: 0015986; generation of  
49  
50 precursor metabolites and energy, GO: 0006091) (Fig. 5B, Table S13 and S14 in Additional  
51  
52 file 2). In particular, three of the identified genes are involved in the oxidative phosphorylation  
53  
54  
55  
56  
57  
58  
59  
60  
61  
62  
63  
64  
65

1 (OxPhos) pathway, which provides the primary cellular energy source in the form of adenosine  
2 triphosphate (ATP). These three genes are nuclear-encoded mitochondrial genes: the catalytic  
3 F1 ATP synthase subunit alpha (*ATP5A*) (Fig. S4 in Additional file 1), a regulatory subunit  
4 acting as an electron transport chain such as ubiquinol-cytochrome *c* reductase core protein  
5 (*UQCRC1*) (Fig. S5 in Additional file 1), and an electron transfer flavoprotein alpha subunit  
6 (*ETFFA*) (Fig. S6 in Additional file 1).  
7  
8  
9  
10  
11  
12  
13  
14  
15

### 16 **Availability of supporting data**

17  
18 The data for *T. kingsejongensis* genome and transcriptome has been deposited in the SRA as  
19 BioProject PRJNA307207 and PRJNA307513, respectively.  
20  
21  
22  
23

### 24 **List of abbreviations**

25  
26 simple sequence repeats, SSRs; Transposable elements, TEs; CEGMA, Core Eukaryotic Genes  
27 Mapping Approach; BUSCO, Benchmarking Universal Single-Copy Orthologs ; Gene  
28 ontology, GO  
29  
30  
31  
32  
33  
34

### 35 **Competing interests**

36  
37 The authors declare no competing interests.  
38  
39  
40  
41

### 42 **Funding**

43  
44 This work was supported by an Antarctic organisms: Cold-adaptation mechanism and its  
45 application grant (PE16070) and the basic research program (PE14260) funded by the Korea  
46 Polar Research Institute (KOPRI).  
47  
48  
49  
50  
51  
52

### 53 **Author contributions**

54  
55 H.P., Sanghee Kim and H.W.K. conceived and designed experiments and analyses; Seunghyun  
56 Kang, D.-H.A., S.G.L., S.C.S., J.L., G.S.M. and H.L. performed experiments and conducted  
57  
58  
59  
60  
61  
62  
63  
64  
65

1 bioinformatics. Seunghyun Kang, H.W.K., Sanghee Kim and H.P. wrote the paper.  
2  
3

4 **Acknowledgements**  
5  
6

7 We would like to thank Joseph A. Covi for comments and discussion.  
8  
9  
10  
11  
12  
13  
14  
15  
16  
17  
18  
19  
20  
21  
22  
23  
24  
25  
26  
27  
28  
29  
30  
31  
32  
33  
34  
35  
36  
37  
38  
39  
40  
41  
42  
43  
44  
45  
46  
47  
48  
49  
50  
51  
52  
53  
54  
55  
56  
57  
58  
59  
60  
61  
62  
63  
64  
65

## References

1. Huys R, Boxshall GA: *Copepod evolution*. Ray Society; 1991.
2. Humes AG: **How many copepods?** *Hydrobiologia* 1994, **292**:1-7.
3. Wells P, Persoone G, Jaspers E, C. C: *Marine ecotoxicological tests with zooplankton*. In: Persoone, G., Jaspers, E., Claus, C. (Eds.), *Ecotoxicological Testing for the Marine Environment*. Inst. Mar. Sci. Res., Bredene; 1984.
4. Ruppert E, Fox R, Barnes R: **Invertebrate Zoology, A Functional Evolutionary Approach**. Brooks/Cole-Thomson Learning, Belmont, CA 2003.
5. Goolish E, Burton R: **Energetics of osmoregulation in an intertidal copepod: Effects of anoxia and lipid reserves on the pattern of free amino accumulation**. *Funct Ecol* 1989:81-89.
6. Lazzaretto I, Libertini A: **Karyological comparison among different Mediterranean populations of the genus *Tigriopus* (Copepoda Harpacticoida)**. *Boll Zool* 2009, **53**:197-201.
7. Davenport J, Barnett P, McAllen R: **Environmental tolerances of three species of the harpacticoid copepod genus *Tigriopus***. *J Mar Biol Assoc UK* 1997, **77**:3-16.
8. Raisuddin S, Kwok KW, Leung KM, Schlenk D, Lee J-S: **The copepod *Tigriopus*: A promising marine model organism for ecotoxicology and environmental genomics**. *Aquat Toxicol* 2007, **83**:161-173.
9. Lee J-S, Rhee J-S, Kim R-O, Hwang D-S, Han J, Choi B-S, Park GS, Kim I-C, Park HG, Lee Y-M: **The copepod *Tigriopus japonicus* genomic DNA information (574Mb) and molecular anatomy**. *Mar Environ Res* 2010, **69**:S21-S23.
10. Thorne MAS, Kagoshima H, Clark MS, Marshall CJ, Wharton DA: **Molecular analysis of the cold tolerant Antarctic Nematode, *Panagrolaimus davidi***. *PLOS one* 2014, **9**:e104526.



- 1  
2  
3  
4  
5  
6  
7  
8  
9  
10  
11  
12  
13  
14  
15  
16  
17  
18  
19  
20  
21  
22  
23  
24  
25  
26  
27  
28  
29  
30  
31  
32  
33  
34  
35  
36  
37  
38  
39  
40  
41  
42  
43  
44  
45  
46  
47  
48  
49  
50  
51  
52  
53  
54  
55  
56  
57  
58  
59  
60  
61  
62  
63  
64  
65
11. Everatta MJ, Worlandb MR, Balea JS, Conveyb P, Hayward SAL: **Pre-adapted to the maritime Antarctic? – Rapid cold hardening of the midge, *Eretmoptera murphyi*.** *J Insect Physiol* 2012, **58**:1104–1111.
  12. Bromwich DH, Nicolas JP, Monaghan AJ, Lazzara MA, Keller LM, Weidner GA, Wilson AB: **Central West Antarctica among the most rapidly warming regions on Earth.** *Nature Geoscience* 2013, **6**:139-145.
  13. Park E-O, Lee S, Cho M, Yoon SH, Lee Y, Lee W: **A new species of the genus *Tigriopus* (Copepoda: Harpacticoida: Harpacticidae) from Antarctica.** *Proc Biol Soc Wash* 2014, **127**:138-154.
  14. Birkenmajer K: **Geology of Admiralty Bay, King George Island (South Shetland Islands). An outline.** *Pol Polar Res* 1980, **1**:29-54.
  15. Marçais G, Kingsford C: **A fast, lock-free approach for efficient parallel counting of occurrences of k-mers.** *Bioinformatics* 2011, **27**:764-770.
  16. Myers EW, Sutton GG, Delcher AL, Dew IM, Fasulo DP, Flanigan MJ, Kravitz SA, Mobarry CM, Reinert KH, Remington KA, et al: **A whole-genome assembly of *Drosophila*.** *Science* 2000, **287**:2196-2204.
  17. Boetzer M, Henkel CV, Jansen HJ, Butler D, Pirovano W: **Scaffolding pre-assembled contigs using SSPACE.** *Bioinformatics* 2011, **27**:578-579.
  18. Nadalin F, Vezzi F, Policriti A: **GapFiller: a *de novo* assembly approach to fill the gap within paired reads.** *BMC Bioinformatics* 2012, **13**:S8.
  19. Holt C, Yandell M: **MAKER2: an annotation pipeline and genome-database management tool for second-generation genome projects.** *BMC Bioinformatics* 2011, **12**:491.
  20. Smit AFA HR, Green, P.: **RepeatMasker Open-3.0. 1996-2004** (<http://www.RepeatMakser.org>).

- 1 21. Korf I: **Gene finding in novel genomes.** *BMC Bioinformatics* 2004, **5**:59.
- 2
- 3 22. Trapnell C, Pachter L, Salzberg SL: **TopHat: discovering splice junctions with RNA-**
- 4 **Seq.** *Bioinformatics* 2009, **25**:1105-1111.
- 5
- 6
- 7
- 8 23. Trapnell C, Williams BA, Pertea G, Mortazavi A, Kwan G, van Baren MJ, Salzberg
- 9 SL, Wold BJ, Pachter L: **Transcript assembly and quantification by RNA-Seq**
- 10 **reveals unannotated transcripts and isoform switching during cell differentiation.**
- 11 *Nat Biotech* 2010, **28**:511-515.
- 12
- 13
- 14
- 15
- 16
- 17
- 18 24. Slater GS, Birney E: **Automated generation of heuristics for biological sequence**
- 19 **comparison.** *BMC Bioinformatics* 2005, **6**:31.
- 20
- 21
- 22
- 23 25. Conesa A, Gotz S, Garcia-Gomez JM, Terol J, Talon M, Robles M: **Blast2GO: a**
- 24 **universal tool for annotation, visualization and analysis in functional genomics**
- 25 **research.** *Bioinformatics* 2005, **21**:3674-3676.
- 26
- 27
- 28
- 29
- 30 26. Nawrocki EP, Kolbe DL, Eddy SR: **Infernal 1.0: inference of RNA alignments.**
- 31 *Bioinformatics* 2009, **25**:1335-1337.
- 32
- 33
- 34
- 35 27. Gardner PP, Daub J, Tate J, Moore BL, Osuch IH, Griffiths-Jones S, Finn RD,
- 36 Nawrocki EP, Kolbe DL, Eddy SR, Bateman A: **Rfam: Wikipedia, clans and the**
- 37 **"decimal" release.** *Nucleic Acids Res* 2011, **39**:D141-145.
- 38
- 39
- 40
- 41
- 42 28. Lowe TM, Eddy SR: **tRNAscan-SE: a program for improved detection of transfer**
- 43 **RNA genes in genomic sequence.** *Nucleic Acids Res* 1997, **25**:955-964.
- 44
- 45
- 46
- 47 29. Parra G, Bradnam K, Korf I: **CEGMA: a pipeline to accurately annotate core genes**
- 48 **in eukaryotic genomes.** *Bioinformatics* 2007, **23**:1061-1067.
- 49
- 50
- 51
- 52 30. Simão FA, Waterhouse RM, Ioannidis P, Kriventseva EV, Zdobnov EM: **BUSCO:**
- 53 **assessing genome assembly and annotation completeness with single-copy**
- 54 **orthologs.** *Bioinformatics* 2015:btv351.
- 55
- 56
- 57
- 58
- 59 31. Chipman AD, Ferrier DE, Brena C, Qu J, Hughes DS, Schröder R, Torres-Oliva M,
- 60
- 61
- 62
- 63
- 64
- 65

- 1 Znassi N, Jiang H, Almeida FC: **The first myriapod genome sequence reveals**  
2 **conservative arthropod gene content and genome organisation in the centipede**  
3 ***Strigamia maritima*. *PLoS Biol* 2014, **12**:e1002005.**  
4  
5  
6  
7  
8  
9 32. Li L, Stoeckert CJ, Roos DS: **OrthoMCL: identification of ortholog groups for**  
10 **eukaryotic genomes. *Genome Res* 2003, **13**:2178-2189.**  
11  
12  
13 33. Löytynoja A, Goldman N: **An algorithm for progressive multiple alignment of**  
14 **sequences with insertions. *Proc Natl Acad Sci U S A* 2005, **102**:10557-10562.**  
15  
16  
17  
18 34. Castresana J: **Selection of conserved blocks from multiple alignments for their use**  
19 **in phylogenetic analysis. *Mol Biol Evol* 2000, **17**:540-552.**  
20  
21  
22  
23 35. Stamatakis A: **RAxML version 8: a tool for phylogenetic analysis and post-analysis**  
24 **of large phylogenies. *Bioinformatics* 2014, **30**:1312-1313.**  
25  
26  
27  
28 36. Hedges SB, Dudley J, Kumar S: **TimeTree: a public knowledge-base of divergence**  
29 **times among organisms. *Bioinformatics* 2006, **22**:2971-2972.**  
30  
31  
32  
33 37. Han MV, Thomas GW, Lugo-Martinez J, Hahn MW: **Estimating gene gain and loss**  
34 **rates in the presence of error in genome assembly and annotation using CAFE 3.**  
35 ***Mol Biol Evol* 2013, **30**:1987-1997.**  
36  
37  
38  
39  
40 38. Rider SD, Morgan MS, Arlian LG: **Draft genome of the scabies mite. *Parasites &***  
41 ***Vectors* 2015, **8**:585.**  
42  
43  
44  
45 39. Hoy M, Waterhouse R, Wu K, Estep A, Ioannidis P, Palmer W, Pomerantz A, Simão  
46 **F, Thomas J, Jiggins F: Genome sequencing of the phytoseiid predatory mite**  
47 ***Metaseiulus occidentalis* reveals completely atomised Hox genes and super-**  
48 **dynamic intron evolution. *Genome biology and evolution* 2016.**  
49  
50  
51  
52  
53  
54  
55 40. Yang Z: **PAML 4: phylogenetic analysis by maximum likelihood. *Mol Biol Evol***  
56 **2007, **24**:1586-1591.**  
57  
58  
59  
60 41. Zhang G, Li C, Li Q, Li B, Larkin DM, Lee C, Storz JF, Antunes A, Greenwold MJ,  
61  
62  
63  
64  
65

1 Meredith RW: **Comparative genomics reveals insights into avian genome evolution**  
2 **and adaptation.** *Science* 2014, **346**:1311-1320.  
3  
4

5  
6 42. Consortium TCSaA: **Initial sequence of the chimpanzee genome and comparison**  
7 **with the human genome.** *Nature* 2005, **437**:69-87.  
8  
9

10  
11 43. Huang DW, Sherman BT, Lempicki RA: **Systematic and integrative analysis of large**  
12 **gene lists using DAVID bioinformatics resources.** *Nature protocols* 2008, **4**:44-57.  
13  
14  
15  
16  
17  
18  
19  
20  
21  
22  
23  
24  
25  
26  
27  
28  
29  
30  
31  
32  
33  
34  
35  
36  
37  
38  
39  
40  
41  
42  
43  
44  
45  
46  
47  
48  
49  
50  
51  
52  
53  
54  
55  
56  
57  
58  
59  
60  
61  
62  
63  
64  
65

1 **Figure legends**  
2  
3

4 **Figure 1** Image of an adult *Tigriopus kingsejongensis* specimen.  
5  
6  
7

8 **Figure 2** Estimation of the *T. kingsejongensis* genome size based on 33-mer analysis. The x-  
9 axis represents the depth (peak at 39X) and the y-axis represents the proportion. The genome  
10 size was estimated as 298 Mb (total k-mer number/volume peak).  
11  
12  
13  
14  
15  
16  
17

18 **Figure 3** Scaffold and contig size distributions of *T. kingsejongensis*. The percentage of the  
19 assembly included (y-axis) in contigs or scaffolds of a minimum size (x-axis, log scale) is  
20 shown for the contig (red) and scaffold (blue).  
21  
22  
23  
24  
25  
26  
27

28 **Figure 4** Comparative genome analyses of the *T. kingsejongensis* genome. **a** Venn diagram of  
29 orthologous gene clusters between the four arthropod lineages. **b** Gene family gain-and-loss  
30 analysis. The number of gained gene families (red), lost gene families (blue) and orphan gene  
31 families (black) are indicated for each species. Time lines specify divergence times between  
32 the lineages.  
33  
34  
35  
36  
37  
38  
39  
40  
41  
42

43 **Figure 5** *Tigriopus kingsejongensis*-specific adaptive evolution. **a** Global mean  $w$  distribution  
44 by GO categories of *T. kingsejongensis* and *T. japonicus*. GO categories showing supposedly  
45 accelerated nonsynonymous divergence (binomial test, test statistic  $< 0.05$ ) in *T.*  
46 *kingsejongensis* and *T. japonicus* are colored in red and blue, respectively. **b** A total of seven  
47 enzyme-coding genes were PSGs involved in the four metabolic pathways (oval frame) of *T.*  
48 *kingsejongensis*: energy (purple), nucleotide (red), lipid (green), and carbohydrate (blue)  
49 metabolic pathways. The three genes belonging to the oxidative phosphorylation pathway  
50  
51  
52  
53  
54  
55  
56  
57  
58  
59  
60  
61  
62  
63  
64  
65

1 (KEGG pathway map00190) (rectangular frame) are presented below the enzymes involved.  
2  
3 Solid lines indicate direct processes and dashed lines indicate that more than one step is  
4 involved in a process.  
5  
6  
7  
8  
9

## 10 **Table legends**

11  
12  
13 **Table 1** Statistics for each DNA library.  
14

15  
16 **Table 2** Sequencing and assembly results of transcriptome analysis of *T. japonicus*.  
17

18  
19 **Table 3** Sequencing statistics of RNA-seq analysis of *T. kingsejongensis*.  
20

21  
22 **Table 4** Statistics of genome assembly.  
23

24  
25 **Table 5** General statistics of genes in *T. kingsejongensis*.  
26

27  
28 **Table 6** *Tigriopus kingsejongensis* genome completeness reports with the other arthropod  
29 genomes.  
30  
31

32 **Table 7** Summary of orthologous gene clusters in the 11 representative species.  
33  
34  
35  
36  
37  
38  
39  
40  
41  
42  
43  
44  
45  
46  
47  
48  
49  
50  
51  
52  
53  
54  
55  
56  
57  
58  
59  
60  
61  
62  
63  
64  
65

**Table 1** Statistics for each DNA library.

| <b>Library</b>   |             | <b>Reads (n)</b> | <b>Ave. length</b> | <b>Sequences (bp) (n)</b> | <b>Reads (trimmed) (n)</b> | <b>Ave. length</b> | <b>Sequences (trimmed) (n)</b> |
|------------------|-------------|------------------|--------------------|---------------------------|----------------------------|--------------------|--------------------------------|
| Paired-end       | Sum         | 99,710,266       |                    | 29,271,916,613            | 65,644,374                 |                    | 14,668,956,871                 |
|                  | 350S1       | 6,661,392        | 300                | 2,005,078,992             | 4,446,394                  | 233                | 1,034,231,244                  |
|                  | 350S2       | 4,933,058        | 265                | 1,311,700,122             | 4,618,711                  | 211                | 975,471,763                    |
|                  | 400S1       | 65,668,598       | 300                | 19,766,247,998            | 36,863,154                 | 228                | 8,397,426,481                  |
|                  | 450S1       | 3,418,988        | 300                | 1,029,115,388             | 2,812,455                  | 230                | 646,302,159                    |
|                  | 450S2       | 8,009,162        | 245                | 1,968,652,020             | 7,660,814                  | 199                | 1,527,566,312                  |
|                  | 500S1       | 11,019,068       | 289                | 3,191,122,093             | 9,242,846                  | 226                | 2,087,958,911                  |
| Mate-Paired      | Sum         | 103,373,998      |                    | 7,753,049,850             | 73,515,391                 |                    | 5,169,006,268                  |
|                  | 3KS1        | 8,374,238        | 75                 | 628,067,850               | 6,745,546                  | 73                 | 493,099,413                    |
|                  | 3KS2        | 9,250,994        | 75                 | 693,824,550               | 5,281,513                  | 65                 | 344,618,723                    |
|                  | 3KS3        | 51,349,594       | 75                 | 3,851,219,550             | 39,147,167                 | 72                 | 2,816,638,666                  |
|                  | 3KS4        | 3,063,232        | 75                 | 229,742,400               | 1,740,986                  | 65                 | 112,554,745                    |
|                  | 8KS1        | 9,847,636        | 75                 | 738,572,700               | 7,887,612                  | 73                 | 572,246,251                    |
|                  | 8KS2        | 16,322,038       | 75                 | 1,224,152,850             | 9,653,293                  | 65                 | 630,842,698                    |
|                  | 8KS3        | 5,166,266        | 75                 | 387,469,950               | 3,059,274                  | 65                 | 199,005,774                    |
| Total            | 203,084,264 |                  | 37,024,966,463     | 139,159,765               |                            | 19,837,963,139     |                                |
| Coverage (folds) |             |                  | 120.7              |                           | 64.7                       |                    |                                |

**Table 2** Sequencing and assembly results of transcriptome analysis of *T. japonicus*.

| <b>Sequencing</b>           |               |
|-----------------------------|---------------|
| Total reads (n)             | 37,956,160    |
| Total bases (n)             | 7,714,415,316 |
| Trimmed reads (n)           | 35,577,636    |
| Trimmed bases (n)           | 5,989,188,343 |
| <b>Assembly</b>             |               |
| Contigs (n)                 | 40,172        |
| Total contig length (bases) | 28,850,726    |
| N50 contig length (bases)   | 1,093         |
| Max scaffold length (bases) | 23,942        |
| <b>Annotation</b>           |               |
| With blast results          | 20,392        |
| Without blast hits          | 7,090         |
| With mapping results        | 8,172         |
| Annotated sequences         | 4,518         |



**Table 3** Sequencing statistics of RNA-seq analysis of *T. kingsejongensis*.

|                   | <b>4°C</b>    | <b>15°C</b>   |
|-------------------|---------------|---------------|
| Total reads (n)   | 15,786,118    | 16,417,072    |
| Total bases (n)   | 3,567,662,668 | 3,763,295,032 |
| Trimmed reads (n) | 14,845,103    | 15,388,513    |
| Trimmed bases (n) | 2,761,189,158 | 2,833,805,442 |

**Table 4** Statistics of genome assembly.

---

**Celera assembler (Version : 8.0)**

---

|          |                               |             |
|----------|-------------------------------|-------------|
| Scaffold | Total scaffold length (bases) | 295,233,602 |
|          | Gap size (bases)              | 10,474,460  |
|          | Scaffolds (n)                 | 11,558      |
|          | N50 scaffold length (bases)   | 159,218     |
|          | Max scaffold length (bases)   | 3,401,446   |
| Contig   | Total contig length (bases)   | 305,712,242 |
|          | Contigs (n)                   | 48,368      |
|          | N50 contig length (bases)     | 17,566      |
|          | Max contig length (bases)     | 349,507     |

---

**Table 5** General statistics of genes in *T. kingsejongensis*.

---

|                          |            |
|--------------------------|------------|
| Genes (n)                | 12,772     |
| Gene Length Sum (bp)     | 82,293,116 |
| Exons per genes (n)      | 4.6        |
| mRNA Length Sum (bp)     | 43,306,342 |
| Average mRNA length (bp) | 1,090      |
| Number of tRNA           | 1,393      |
| Number of rRNA           | 215        |

---

**Table 6** *Tigriopus kingsejongensis* genome completeness reports with the other arthropod genomes.

| Species            | <i>Tigriopus kingsejongensis</i> | <i>Daphnia pulex</i>           | <i>Ixodes scapularis</i>            | <i>Mesobuthus martensii</i>         | <i>Strigamia maritima</i>      | <i>Tetranychus urticae</i>         | <i>Drosophila melanogaster</i>  | <i>Aedes aegypti</i>          |
|--------------------|----------------------------------|--------------------------------|-------------------------------------|-------------------------------------|--------------------------------|------------------------------------|---------------------------------|-------------------------------|
| Assembly           | This study                       | GCA_000187875.1                | GCA_000208615.1                     | GCA_000484575.1                     | Smar1.22                       | GCA_000239435.1                    | Dmel_r5.55                      | AaegL3                        |
| Sample type        | genome                           | genome                         | genome                              | genome                              | genome                         | genome                             | genome                          | genome                        |
| CEGMA <sup>a</sup> | 83/77.8                          | 99.2/98.8                      | 79.8/41.9 <sup>§</sup>              | 57.3/24.2 <sup>§</sup>              | 95.1 <sup>f</sup>              | 98.0/95.2 <sup>§</sup>             | 100/100                         | 99.2/83.5                     |
| BUSCO <sup>b</sup> | 61.1 [10.5], 10.7, 28.1          | 83 [3.9], 11, 5.1 <sup>e</sup> | 68.9 [2.4], 21.0, 10.1 <sup>§</sup> | 34.4 [4.0], 23.0, 42.7 <sup>§</sup> | 84 [5.9], 12, 3.2 <sup>e</sup> | 68.8 [5.8], 9.9, 21.3 <sup>§</sup> | 98 [6.4], 0.6, 0.3 <sup>e</sup> | 86 [13], 10, 3.2 <sup>e</sup> |
| BUSCO <sup>c</sup> | 70.9 [13.6], 6.0, 23.0           |                                |                                     |                                     |                                |                                    |                                 |                               |
| BUSCO <sup>d</sup> | 67.1 [16.8], 5.1, 27.7           |                                |                                     |                                     |                                |                                    |                                 |                               |

<sup>a</sup> 248 CEGMA genes Found/Complete<sup>b</sup> BUSCO Arthropods Complete [Duplicated], Fragmented, Missing<sup>c</sup> BUSCO Metazoan Complete [Duplicated], Fragmented, Missing<sup>d</sup> BUSCO Eukaryotes Complete [Duplicated], Fragmented, Missing<sup>e</sup> [30]<sup>f</sup> [31]<sup>§</sup> [39]

**Table 7** Summary of orthologous gene clusters in the 11 representative species.

| Species                        | Source of data                                                                                              | No. of coding genes | No. of gene families | No. of genes in gene families | No. of orphan genes | No. of unique gene families | Average No. of genes in gene families |
|--------------------------------|-------------------------------------------------------------------------------------------------------------|---------------------|----------------------|-------------------------------|---------------------|-----------------------------|---------------------------------------|
| <i>Aedes aegypti</i>           | Ensembl genome 25                                                                                           | 15,797              | 7,958                | 12,792                        | 7,839               | 854                         | 1.61                                  |
| <i>Caenorhabditis elegans</i>  | Ensembl gene 78                                                                                             | 20,447              | 6,536                | 13,737                        | 13,911              | 1,528                       | 2.10                                  |
| <i>Ciona intestinalis</i>      | Ensembl gene 78                                                                                             | 16,671              | 7,017                | 9,058                         | 9,654               | 503                         | 1.29                                  |
| <i>Daphnia pulex</i>           | Ensembl genome 25                                                                                           | 30,590              | 6,710                | 8,362                         | 7,208               | 368                         | 1.25                                  |
| <i>Drosophila melanogaster</i> | Ensembl gene 78                                                                                             | 13,918              | 9,673                | 21,917                        | 20,917              | 2,408                       | 2.27                                  |
| <i>Homo sapiens</i>            | Ensembl gene 78                                                                                             | 20,300              | 8,696                | 17,186                        | 11,604              | 1,065                       | 1.98                                  |
| <i>Ixodes scapularis</i>       | Ensembl genome 25                                                                                           | 20,486              | 8,097                | 11,277                        | 12,389              | 873                         | 1.39                                  |
| <i>Mesobuthus martensii</i>    | <a href="http://lifecenter.sgst.cn/main/en/scorpion.jsp">http://lifecenter.sgst.cn/main/en/scorpion.jsp</a> | 32,016              | 8,389                | 19,961                        | 23,627              | 2,276                       | 2.38                                  |
| <i>Strigamia maritima</i>      | Ensembl genome 25                                                                                           | 14,992              | 7,727                | 11,012                        | 7,265               | 583                         | 1.43                                  |
| <i>Tetranychus urticae</i>     | Ensembl genome 25                                                                                           | 18,224              | 6,602                | 11,788                        | 11,622              | 939                         | 1.79                                  |
| <i>T. kingsejongensis</i>      | this study                                                                                                  | 12,772              | 6,205                | 8,813                         | 6,567               | 649                         | 1.42                                  |

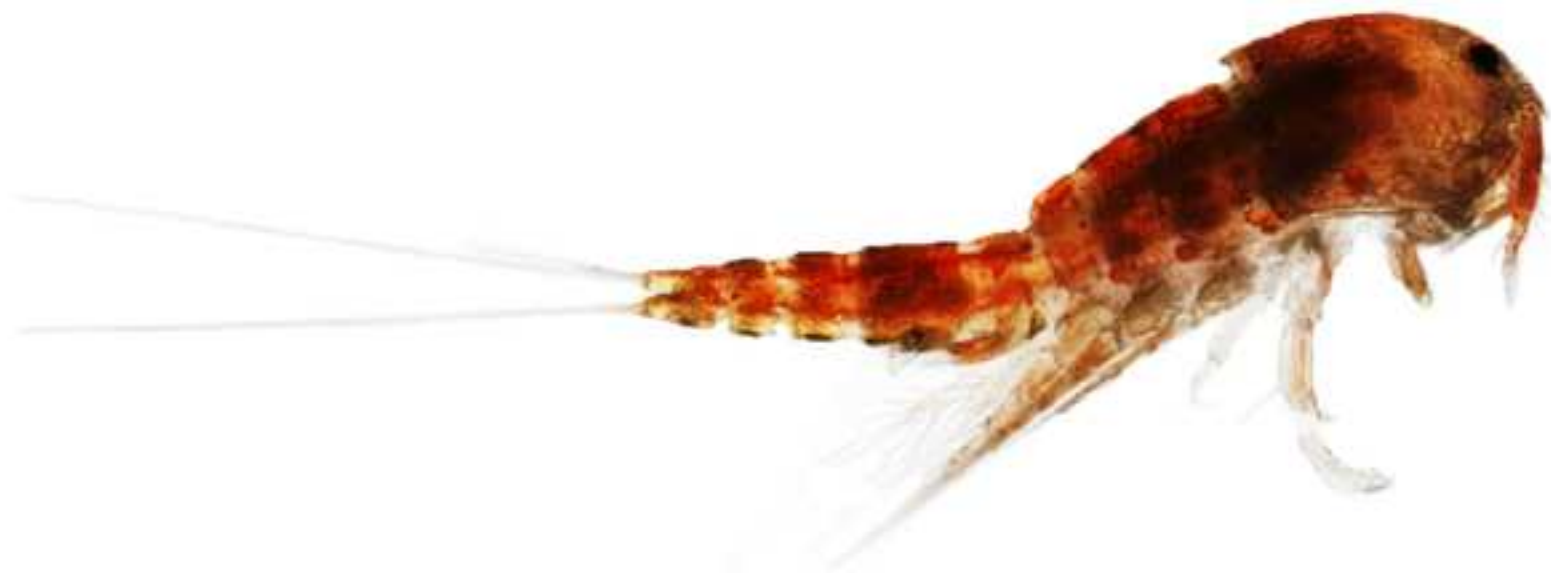

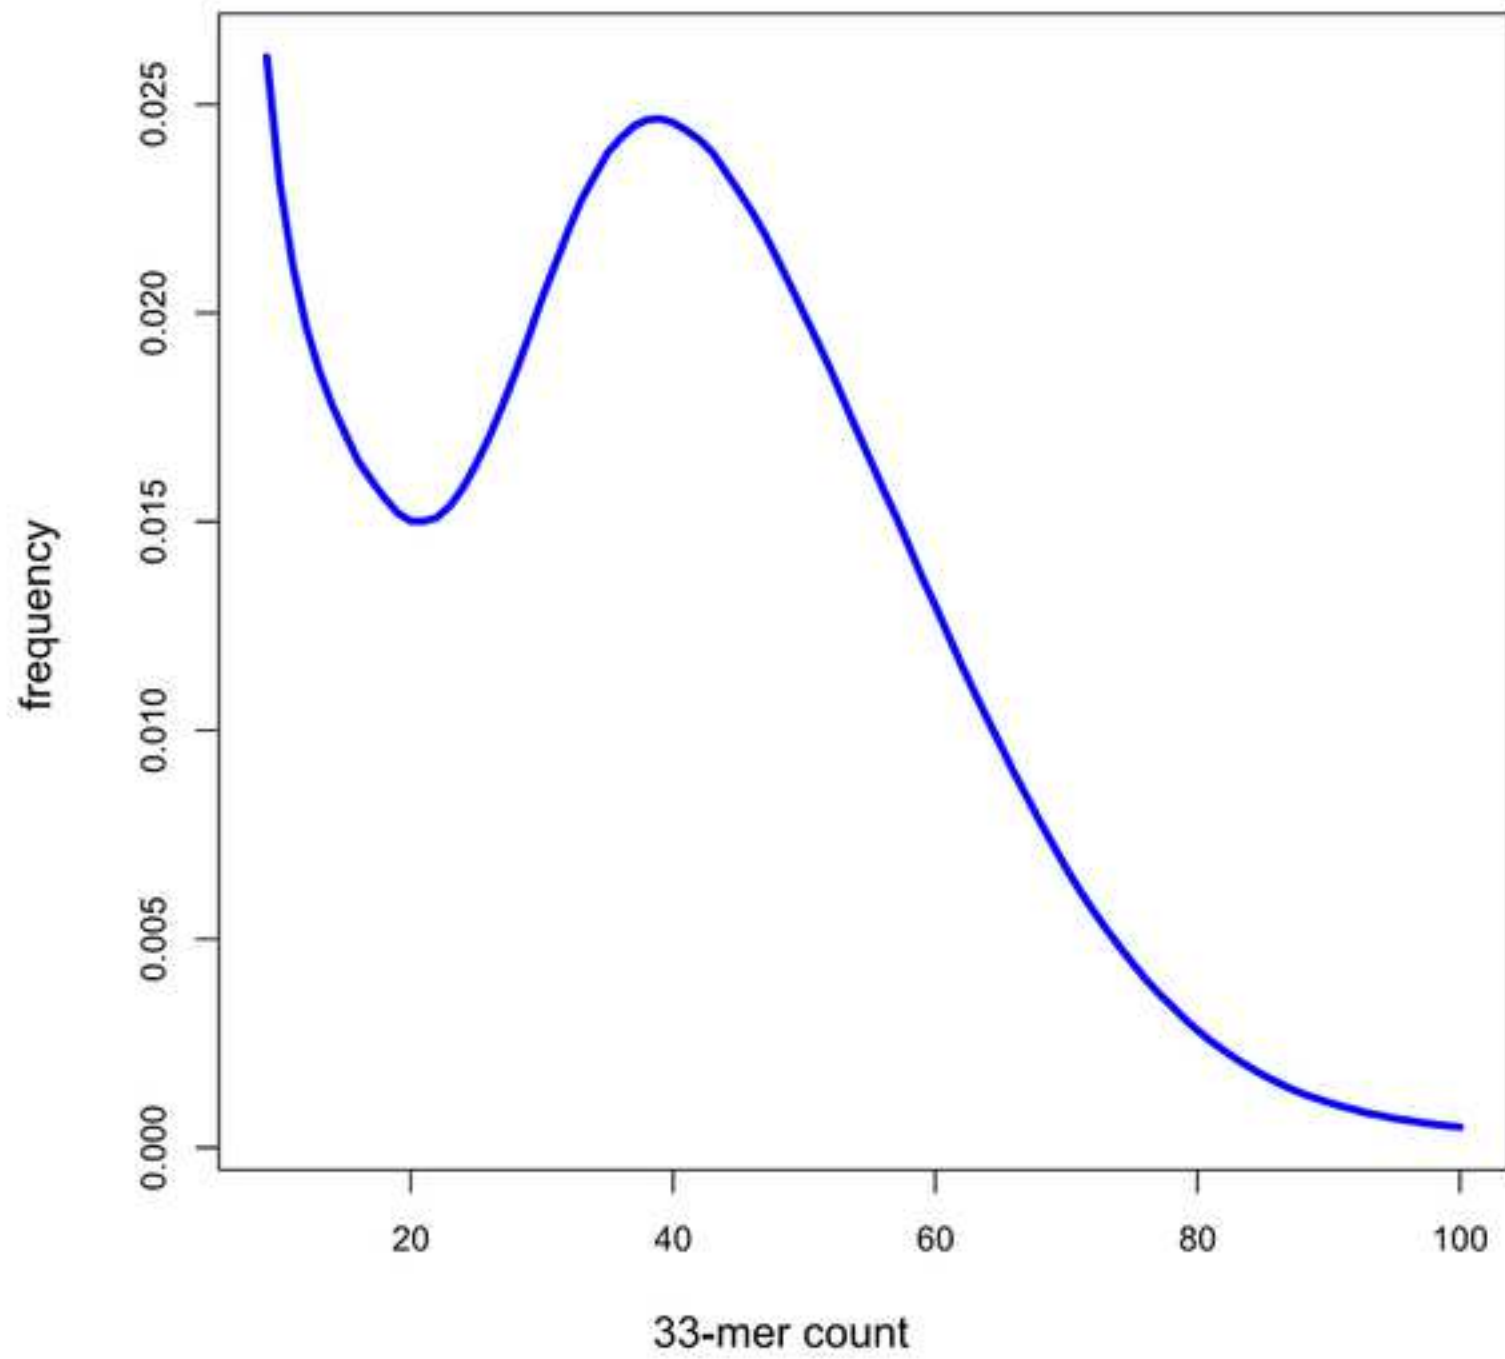

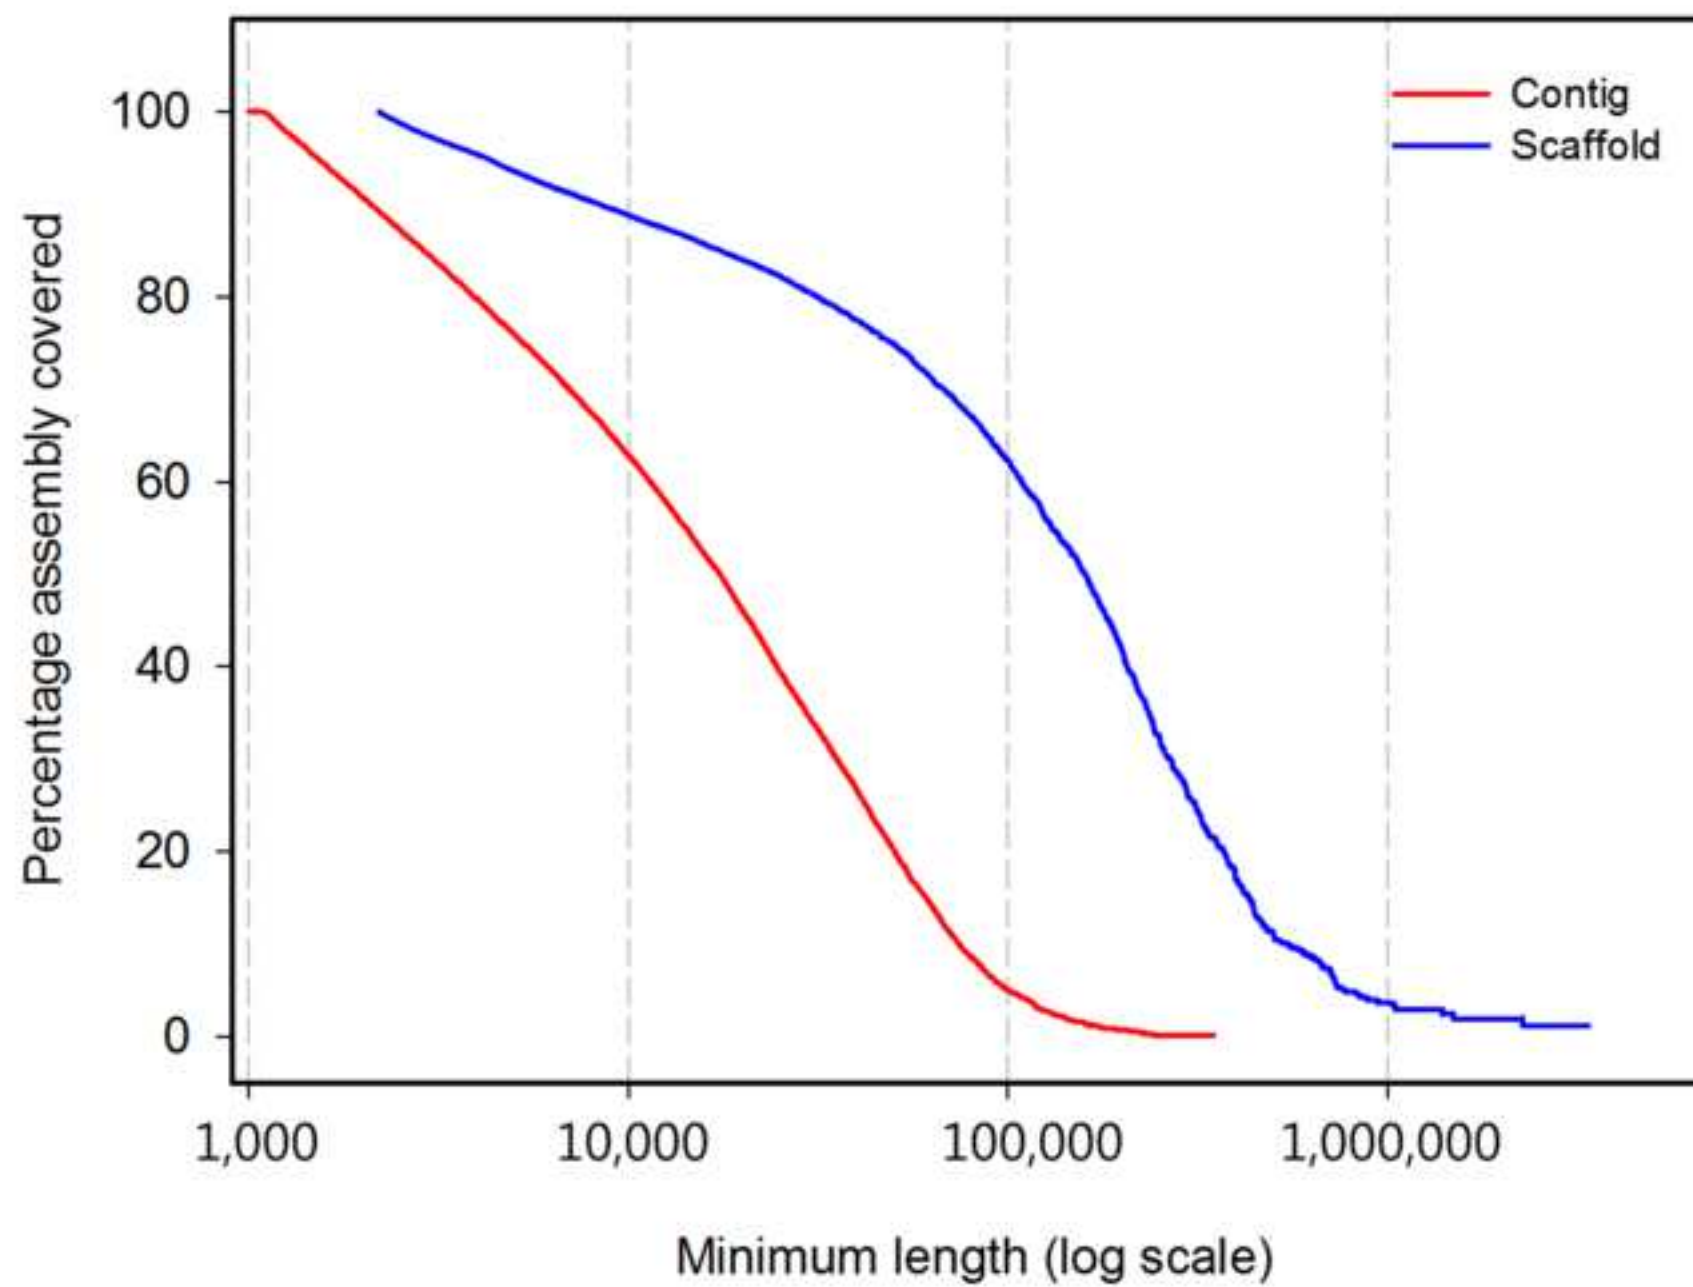



A

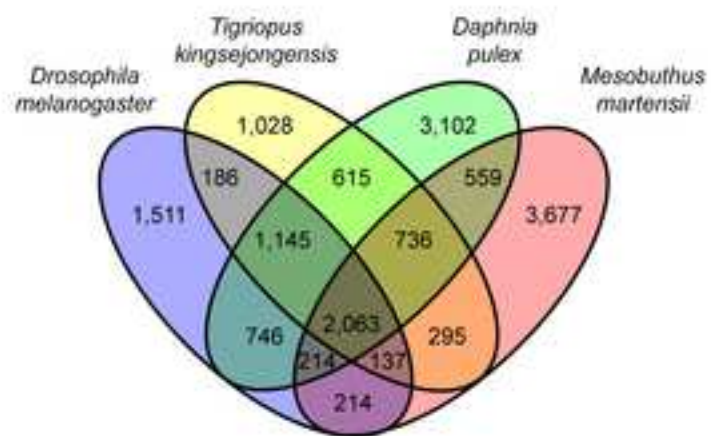

B

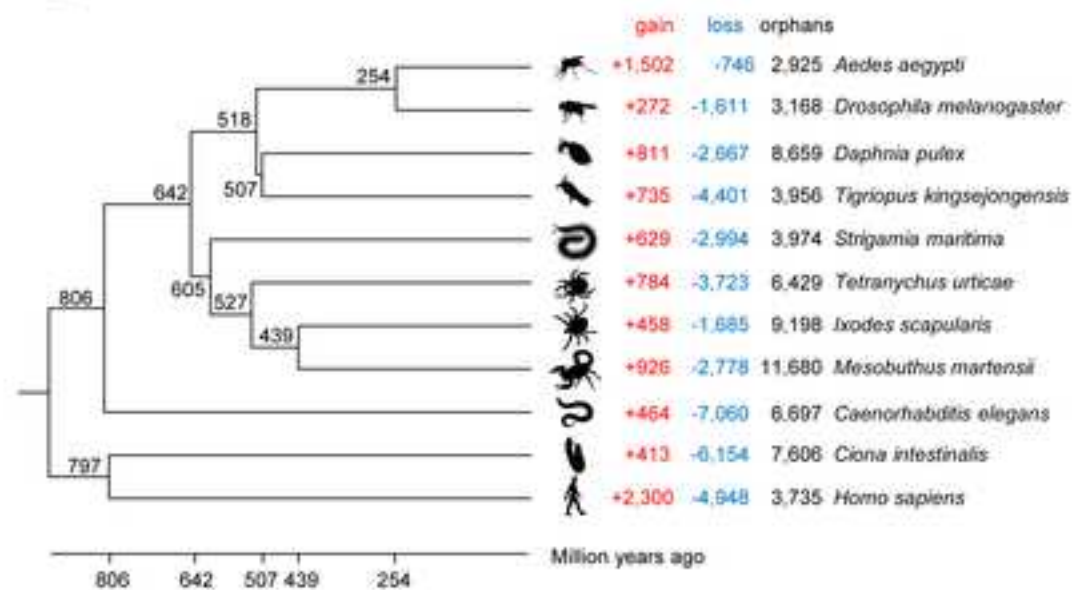

A

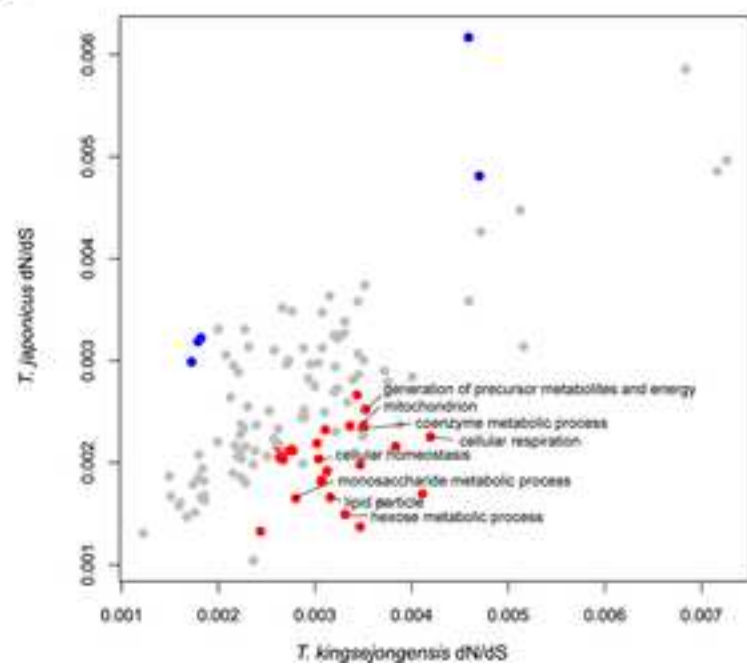

B

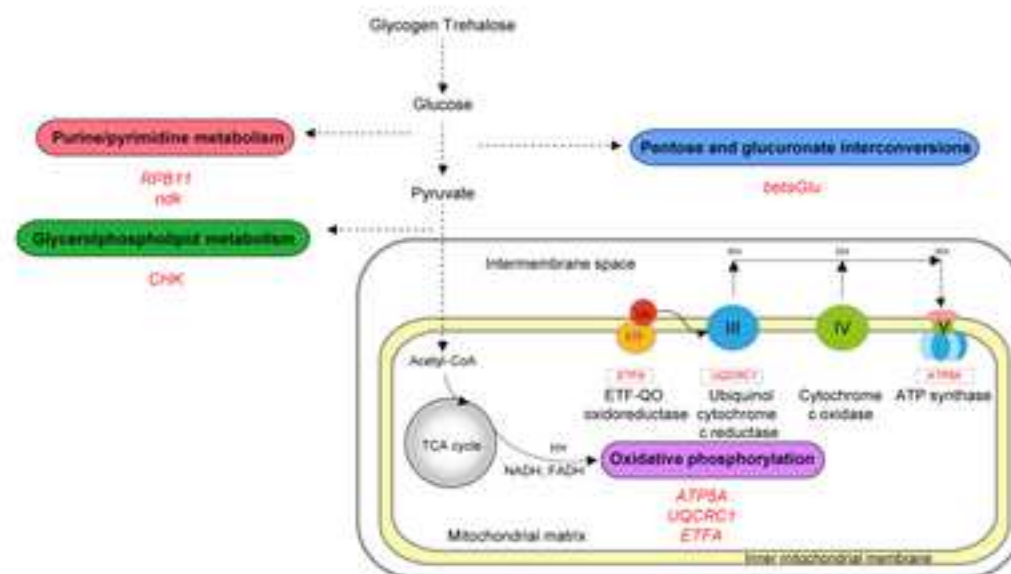

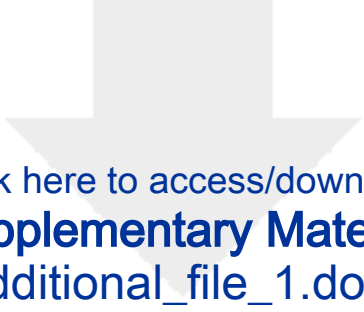

Click here to access/download  
**Supplementary Material**  
Additional\_file\_1.docx



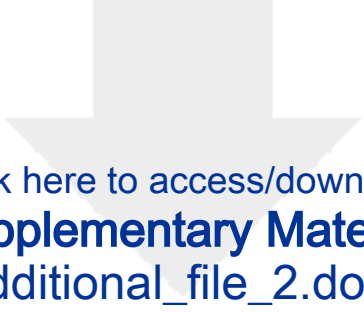

Click here to access/download  
**Supplementary Material**  
Additional\_file\_2.docx



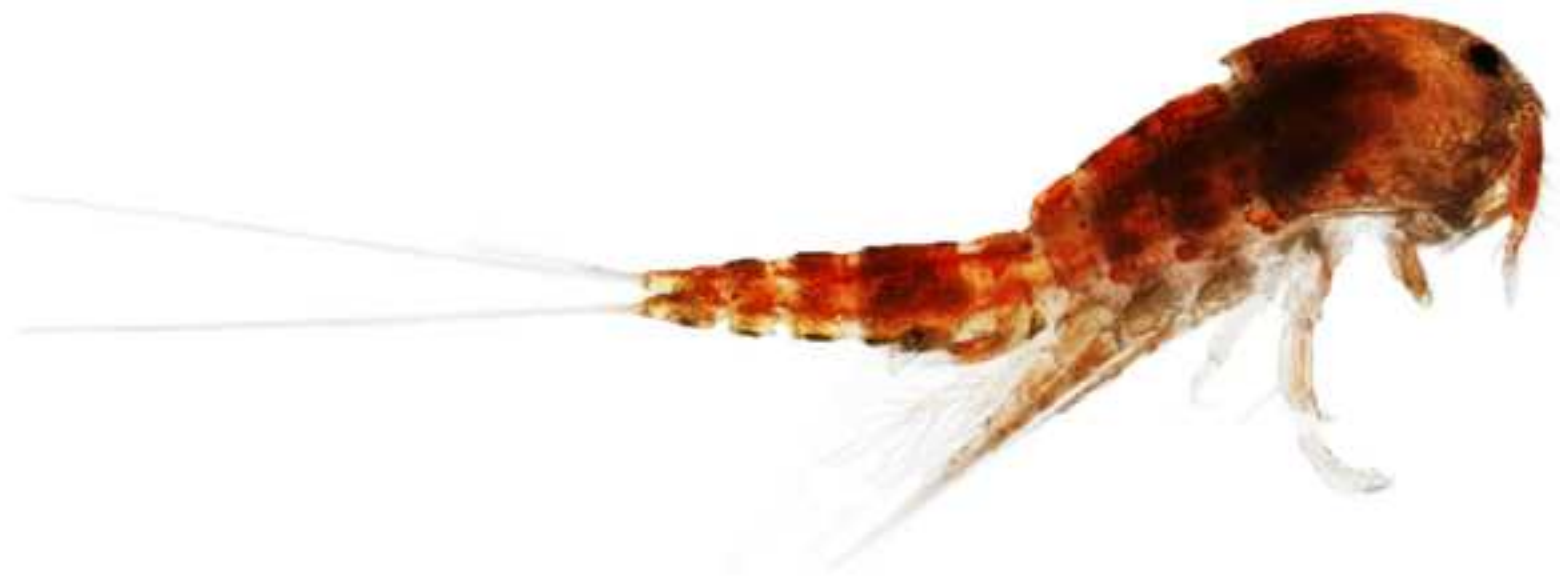

Supplement: giw010_GIGA-D-16-00040_Revision_3.pdf [file giw010_GIGA-D-16-00040_Revision_3.pdf]
