# Supplementary material for: The genome of the Antarctic-endemic copepod, Tigriopus kingsejongensis
Source: PubMed Central journal article supplement (PMC5467011; doi:10.1093/gigascience/giw010), 2017-01-07
Supplement: giw010_GIGA-D-16-00040_Original_Submission.pdf [file giw010_GIGA-D-16-00040_Original_Submission.pdf]

[Click here to view linked References](#)

1                   **The First Copepod Genome Reveals Evolutionary Adaptation to Extreme**  
2  
3  
4                   **Environments in the Antarctic-endemic *Tigriopus***  
5  
6  
7  
8  
9

10  
11           Seunghyun Kang<sup>1¶</sup>, Do-Hwan Ahn<sup>1¶</sup>, Jun Hyuck Lee<sup>1,2</sup>, Sung Gu Lee<sup>1,2</sup>, Seung Chul Shin<sup>1</sup>,  
12  
13           Jungeun Lee<sup>1</sup>, Gi-Sik Min<sup>3</sup>, Hyoungseok Lee<sup>1</sup>, Hyun-Woo Kim<sup>4\*&</sup>, Sanghee Kim<sup>1\*&</sup> & Hyun  
14  
15           Park<sup>1,2\*&</sup>  
16  
17  
18  
19  
20

21           <sup>1</sup> Division of Polar Life Sciences, Korea Polar Research Institute, Yeonsu-gu, Incheon, South  
22  
23           Korea  
24

25  
26           <sup>2</sup> Polar Sciences, University of Science & Technology, Yuseong-gu, Daejeon, South Korea  
27

28           <sup>3</sup> Department of Biological Sciences, Inha University, Incheon, South Korea  
29

30           <sup>4</sup> Department of Marine Biology, Pukyong National University, Busan, South Korea  
31

32  
33           \* Corresponding author  
34

35  
36           E-mail: kimhw@pknu.ac.kr; sangheekim@kopri.re.kr; hpark@kopri.re.kr  
37

38           <sup>¶</sup>These authors contributed equally to this work.  
39

40  
41           <sup>&</sup>These authors also contributed equally to this work.  
42  
43  
44  
45  
46  
47  
48  
49  
50  
51  
52  
53  
54  
55  
56  
57  
58  
59  
60  
61  
62  
63  
64  
65

## Abstract

**Background:** The subclass copepods are more rich in species than any other group of multicellular animals including insects and nematodes. Despite of their extraordinary economic and ecological importance, still genomic resources are limited to these groups. The Antarctic intertidal zone is continuously subject to extreme fluctuations in biotic and abiotic stressors, and the West Antarctic Peninsula is the most rapidly warming region on earth. Organisms living in Antarctic intertidal pools are therefore of great interest for research on topics such as evolutionary adaptation to extreme environments and the effects of climate change.

**Results:** Here, we report the whole-genome sequence of the endemic Harpacticoid copepod, *Tigriopus kingsejongensis*. Comparative genome analysis revealed that *T. kingsejongensis* specific genes are enriched in transport and metabolism processes. Furthermore, rapidly evolving genes related to energy metabolism showed signatures of positive selection. Evolutionary adaptation to cold temperatures has led to the distinct feature that transmembrane transport genes (*TkTret*) in functional categories are highly induced at low temperatures. The *TkTret* gene family is regulated at low temperatures by specific transcription factors, these have been reported to be involved in the transport of trehalose, which provides a cryo- or anhydroprotectant nutrient source that helps protect against environmental stresses. Interestingly, this phenomenon is not observed in the temperate genome of *Tigriopus* specie.

**Conclusions:** The genome of *T. kingsejongensis* therefore provides an interesting example of an evolutionary strategy for Antarctic cold adaptation, and offers new genetic insights into Antarctic intertidal biota.

## Keywords

Copepoda, Genomics, Antarctic, adaptation, *Tigriopus*

## Background

The subclass copepods are more diverse than any other group of multicellular animals including insects and nematodes and so far approximately 12,000 described copepod species have been described [1, 2]. They dominate the zooplankton community contributing about 70% of total zooplankton biomass [3] and play an important role in the marine meiobenthic food web linking between the phytoplankton and higher trophic levels [4]. Harpacticoid copepods of the genus *Tigriopus* Norman 1868 are dominant members of shallow supratidal rock pools worldwide. They are distributed among habitats that vary widely in salinity, temperature, desiccation risk, and UV radiation, and have been used as a model system to investigate topics such as osmoregulation [5], temperature adaptation [6, 7] and environmental toxicology [8]. Although their biological and economic importance, currently there are no published Copepoda genome available yet.

Antarctica provides not only an extreme habitat for extant organisms, but also a model for research on evolutionary adaptations to cold environments [9, 10]. The Antarctic intertidal zone, particularly in the Western Antarctic Peninsula region, is one of the most extreme environments on earth. It also serves as a potential barometer for global climate changes, since it is the fastest-warming region on earth [11]. Antarctic intertidal species that have evolved stenothermal phenotypes through adaptation to a year-round climate of extreme cold may now face extinction by global warming. The response of these species to further warming in Western Antarctica is of serious concern; however, to date there have been few studies focusing on species from the Antarctic intertidal zone.

*Tigriopus kingsejongensis* was first found and recognized as a new endemic species in a rock pool in the Antarctic Peninsula (Figure S1 and S2 in Additional file 1), and is extremely cold-tolerant and can survive in frozen sea water [12]. We observed the morphological differences,

1 such as increased numbers of caudal setae in nauplii, optimal growth temperature (ca. 8°C) and  
2  
3 developmental characteristics have been compared to those of the congener *Tigriopus*  
4  
5 *japonicus*, which is found in the coastal area of the Yellow Sea. *Tigriopus kingsejongensis* has  
6  
7 evolved to overcome the unique environmental constraints of Antarctica, and therefore provides  
8  
9 an ideal experimental model for all aspects of research on extreme habitats. This species may  
10  
11 represent a case of rapid speciation, since the intertidal zone on King George Island and  
12  
13 surrounding areas did not exist before 10,000 years ago [13]. *Tigriopus kingsejongensis* likely  
14  
15 evolved as a distinct species within this relatively short time period. Thus, inter- and  
16  
17 intraspecies comparative analyses of Antarctic *Tigriopus* species will help define the trajectory  
18  
19 of adaptation to the Antarctic environment and also provide insights into the genetic basis of  
20  
21 *Tigriopus* divergence and evolution.  
22  
23  
24  
25  
26

## 27 28 **Data description**

29  
30  
31 In this study, we sequenced the genome of *T. kingsejongensis* using a whole-genome  
32  
33 shotgun strategy with the Illumina Miseq platform. *De novo* assembly of 203 million reads  
34  
35 from paired-end libraries and mate-paired libraries yielded a draft assembly (65-fold coverage)  
36  
37 with a total length of 295 Mb, and contig and scaffold N50 sizes of 17.6 kb and 159.2 kb,  
38  
39 respectively. Non-gap sequences occupied 284.8 Mb (96.5%), and simple sequence repeats  
40  
41 (SSRs) were 1.2 Mb (0.4%) in total. Transposable elements (TEs) comprised 6.5 Mb, which is  
42  
43 roughly 2.3% of the assembled genome (Figure S3 and S4 in Additional file 1, Table S1-S5 in  
44  
45 Additional file 2). On the basis of homology and *ab initio* gene prediction, we found that the  
46  
47 genome of *T. kingsejongensis* contains 12,772 protein-coding genes (Figure S5 and S6 in  
48  
49 Additional file 1, Table S6 and S7 in Additional file 2). By assessing the quality of the  
50  
51 annotated 12,772 gene models, we found that 11,686 protein-coding genes (91.5%) were  
52  
53 supported by the RNA-seq data, of which, 7,325 (63%) showed similarity to proteins from  
54  
55  
56  
57  
58  
59  
60  
61  
62  
63  
64  
65

1 other species. We also found that 376 of the 458 CEGMA (Core Eukaryotic Genes Mapping  
2  
3 Approach) core genes were identified in the gene models, of which, 356 (94.7%) were  
4 supported by the RNA-seq data.  
5  
6  
7

## 8 9 **Analysis**

### 10 11 12 13 **Gene families**

14  
15  
16 We constructed orthologous gene clusters using four arthropod species (Antarctic  
17 copepod, *T. kingsejongensis*; scorpion, *Mesobuthus martensii*; fruit fly, *Drosophila*  
18 *melanogaster* and water flea, *Daphnia pulex*) to compare the genomic features and the adaptive  
19 divergence in the arthropods. In total, 2,063 gene families are shared by all four species, and  
20 1,028 genes are specific to the Antarctic copepod. *Tigriopus kingsejongensis* shares 4,559  
21 (73.5%) gene families with *D. pulex*, which belongs to the same crustacean lineage  
22 Vericrustacea, 3,531 (56.9%) with *D. melanogaster*, and 3,231 (52.1%) with *M. martensii*  
23 (Figure 1A). Gene ontology (GO) analysis revealed that the 1,028 *T. kingsejongensis*-specific  
24 genes are enriched in transport (single-organism transport, GO: 0044765; transmembrane  
25 transport, GO: 0055085; ion transport, GO: 0006811; cation transport, GO: 0006812) and  
26 single-organism metabolic processes (GO: 0044710) (Table S8 and S9). Subsequently, we  
27 performed gene gain-and-loss analysis on 11 representative species, and found that *T.*  
28 *kingsejongensis* gained 735 gene families and lost 4,401 gene families (Figure 1B, Table S10  
29 in Additional file 2). Thus, this species exhibits a gene family turnover of 5,136, the largest  
30 value among the eight arthropods. We also analyzed expansion and contraction of the gene  
31 families (Table S11-S13), and found 232 significantly expanded gene families in *T.*  
32 *kingsejongensis*; these gene families are significantly overrepresented in amino acid  
33 metabolism and carbohydrate metabolism in KEGG metabolic pathways (Table S14 in  
34  
35  
36  
37  
38  
39  
40  
41  
42  
43  
44  
45  
46  
47  
48  
49  
50  
51  
52  
53  
54  
55  
56  
57  
58  
59  
60  
61  
62  
63  
64  
65

1 Additional file 2).  
2  
3  
4

## 5 **Genome evolution**

6

7  
8 Adaptive functional divergence caused by natural selection is commonly estimated  
9  
10 based on the ratio of nonsynonymous ( $dN$ ) to synonymous ( $dS$ ) mutations. The average  $dN/dS$   
11 ratio ( $w$ ) from 2,937 co-orthologous genes of *T. kingsejongensis* (0.0027) is higher than that of  
12 *T. japonicus* (0.0022). The GO categories that showing evidence of accelerated evolution in *T.*  
13 *kingsejongensis* are energy metabolism (generation of precursor metabolites and energy, GO:  
14 0006091; cellular respiration, GO: 0045333) and carbohydrate metabolism (monosaccharide  
15 metabolic process, GO: 0005996; hexose metabolic process, GO: 0019318) (Figure 2A, Table  
16 S15 in Additional file 2). Branch-site model analysis showed that the genes belonging to the  
17 functional categories above have undergone a significant positive selection process by putative  
18 functional divergence in certain lineages. There are 74 and 79 positively selected genes (PSGs)  
19 in *T. kingsejongensis* (Table S16 in Additional file 2) and *T. japonicus* (Table S17 in Additional  
20 file 2), respectively. The functional categories enriched in *T. kingsejongensis*, when compared  
21 to *T. japonicus*, support the idea that the functional divergence in *T. kingsejongensis* is strongly  
22 related to energy metabolism (oxidative phosphorylation, GO: 0006119; energy-coupled  
23 proton transport down electrochemical gradient, GO: 0015985; ATP synthesis-coupled proton  
24 transport, GO: 0015986; generation of precursor metabolites and energy, GO: 0006091)  
25 (Figure 2B, Table S18 and S19 in Additional file 2). In particular, three of the identified genes  
26 are involved in the oxidative phosphorylation (OxPhos) pathway, which provides the primary  
27 cellular energy source in the form of adenosine triphosphate (ATP). These three genes are  
28 nuclear-encoded mitochondrial genes: the catalytic F1 ATP synthase subunit alpha (*ATP5A*)  
29 (S7 Fig), a regulatory subunit acting as an electron transport chain such as ubiquinol-  
30 cytochrome *c* reductase core protein (*UQCRC1*) (S8 Fig), and an electron transfer flavoprotein  
31  
32  
33  
34  
35  
36  
37  
38  
39  
40  
41  
42  
43  
44  
45  
46  
47  
48  
49  
50  
51  
52  
53  
54  
55  
56  
57  
58  
59  
60  
61  
62  
63  
64  
65

1 alpha subunit (*ETFA*) (S9 Fig).  
2  
3  
4

## 5 **Temperature-specific gene expression patterns** 6

7  
8 Cold temperatures are a key factor in the Antarctic environment, and represent a major  
9 driving force of adaptation and evolution among Antarctic organisms. To determine the genetic  
10 basis for the metabolic adjustment of *Tigriopus* to cold and warm temperatures, we compared  
11 temperature-dependent RNA expression at 4°C and 15°C (Figure 3A, Table S6 in Additional  
12 file 2). Approximately, the temperature specific libraries yielded 15-16 million reads per  
13 experiment with about 3.5-3.8 billion bases each. Among 12,772 annotated genes, 2,276 genes  
14 are over-expressed at 4°C, whereas 2,560 genes are over-expressed at 15°C. Twenty-three GO  
15 terms are enriched based on a GO enrichment test for genes showing greater than 2-fold  
16 overexpression at 4°C (S10 Fig, Table S20 in Additional file 2). Among these GO terms, the  
17 transmembrane transport (GO: 0055085) term included four facilitated trehalose transporter  
18 genes (*Tret*) (Table S21 in Additional file 2). Trehalose is the main hemolymph sugar that  
19 serves as a nutrient source in most arthropods; further, it acts as a protectant, promoting insect  
20 survival against harsh conditions such as desiccation, heat and cold [14, 15]. One strategy used  
21 by many insects to tolerate cold temperatures is the induction of high levels of polyols (such  
22 as glycerol or sugars including trehalose), which act as cryoprotectants. In Antarctic midge, the  
23 injection of trehalose enhanced resistance to heat and cold stress and dehydration [16]. The *T.*  
24 *kingsejongensis* genome includes seven *Tret* genes (Figure S11 and S12 in Additional file 1),  
25 which is higher than other arthropods (*D. melanogaster* and *T. japonicus* possess four *Tret*  
26 genes each) (Table S22 in Additional file 2).  
27  
28  
29  
30  
31  
32  
33  
34  
35  
36  
37  
38  
39  
40  
41  
42  
43  
44  
45  
46  
47  
48  
49  
50  
51  
52

53  
54  
55 A duplication event of common gene families, reported in the genome of *D. pulex* [17-20],  
56 might be related to evolutionary innovations such as neofunctionalization and  
57  
58  
59  
60  
61  
62  
63  
64  
65

1 subfunctionalization [17]. Duplication of *Tret* genes in Antarctic *Tigriopus* (*TkTret*) may  
2  
3 represent an important evolutionary innovation, since they are known to be involved in the  
4  
5 production of cryoprotectant nutrients. Notably, at cold temperatures, the expression of two  
6  
7 *Tret* genes (*TkTret1-3* and *TkTret1-7*) were highly upregulated (38 to 42-fold), and those of  
8  
9 two other *Tret* genes (*TkTret1-5* and *TkTret1-6*) were slightly upregulated (2 to 5-fold) in the  
10  
11 *T. kingsejongensis*. Additionally, we found 356 overrepresented transcription factor binding  
12  
13 sites in the promoter regions among 2,276 upregulated genes at 4°C using F-Match analysis  
14  
15 with TRANSFAC data (Table S23 in Additional file 2) [21]. Four upregulated *TkTret* genes  
16  
17 contain 16 kinds of transcription factor binding regions (Figure 3B and C), among which, 12  
18  
19 are shared by all upregulated genes. Transcription factor gene expression patterns for the  
20  
21 *TkTret* genes showed that the expressions of *ELK1*, *OCT1*, *PAX4*, *BRN2* and *MCM1* are  
22  
23 increased at low temperatures compared to those at high temperatures (Figure 3D). *ELK1* and  
24  
25 *OCT1* are known to play important roles in the developmental process [22, 23], and *MCM1* has  
26  
27 been speculated to coordinate cell cycle progression with changes in cell wall integrity and  
28  
29 metabolic activity [24].  
30  
31  
32  
33  
34  
35  
36  
37  
38

## 39 Discussion

40  
41  
42 Although it is difficult to elucidate the transcription factor's primary role in the cell,  
43  
44 differential expression of transcription factors is an important mechanism for regulating the  
45  
46 expression of targeted genes in cold environments. These putative cold-regulated transcription  
47  
48 factors have been reported to regulate gene networks not only to maintain normal energy  
49  
50 production in cold environments, but also to help withstand constant low temperatures and  
51  
52 seasonal food scarcity in the extreme environment of Antarctica. We were unable to see the  
53  
54 increase on genes responsible for trehalose biosynthesis, assuming that *T. kingsejongensis*  
55  
56 regulate the trehalose levels via facilitation of transporter in harsh but endurable condition (e.g.,  
57  
58  
59  
60  
61  
62  
63  
64  
65



1 4°C in our experiment) rather than synthesize trehalose itself which usually happens in life-  
2  
3 threatening condition (e.g., desiccation and frozen). As in larvae of *Polypedilum vanderplanki*,  
4  
5 desiccation stress induces trehalose synthesis [25, 26] and gene expression of *Tret1* in the fat  
6  
7 body, it would be interesting to see whether the similar induction happens during some days  
8  
9 on a year-round condition in Antarctica.  
10  
11  
12  
13

14 Mitochondrial DNA- and nuclear-encoded mitochondrial genes, particularly those  
15  
16 belonging to the OxPhos pathway, are highly conserved, even between distantly related species  
17  
18 [27]. Mutations in mitochondrial genes are known to cause a variety of negative effects,  
19  
20 including increased oxidative stress, a reduction in body mass and survival, and metabolic  
21  
22 disorders [28-30]. Polymorphism within *ATP5A* in ovenbirds is associated with higher  
23  
24 individual fitness by conferring increased body mass [31], implying a possible role for this  
25  
26 gene in environmental adaptation. Furthermore, *UQCRC1* polymorphism in humans is  
27  
28 associated with body lipid accumulation [32], and *ETFA* polymorphism is related to altered  
29  
30 thermal stability of enzyme activity [33, 34]. The most distinct environmental adaptations for  
31  
32 Antarctic *Tigriopus* are to a constant low temperature and seasonal food scarcity in Antarctica.  
33  
34 The genetic variations on genes can answer for the successful settlement of *T. kingsejongensis*,  
35  
36 by fulfilling the need for efficient energy production and adequate energy preservation in an  
37  
38 extremely cold environment.  
39  
40  
41  
42  
43  
44  
45  
46

47 Despite their extraordinary species richness, economic and environmental importance,  
48  
49 genomic and genomic information about copepods has been limited. This study presents the  
50  
51 first genome sequence, to our knowledge, of Copepoda. The evolutionary analyses based on  
52  
53 novel *T. kingsejongensis* whole-genome and transcriptome data provide important insights into  
54  
55 adaptation to harsh Antarctic environments. Further understanding of the signatures of adaptive  
56  
57 evolution in similar environments is necessary for functional analysis of the genes identified in  
58  
59  
60  
61  
62  
63  
64  
65

1 this species. The present work provides an Antarctic eco-model system that can be used for  
2  
3 further research on adaptations, ecological and population studies of Antarctic biota, as well as  
4  
5 a foundation for addressing key issues related to the management of Antarctic environmental  
6  
7 changes.  
8  
9

## 10 11 **Methods**

### 12 13 **DNA library construction and sequencing**

14  
15  
16 *Tigriopus kingsejongensis* were collected from tidal pools in Potter Cove, near King  
17  
18 Sejong Station, on the northern Antarctic Peninsula (62°14'S, 58°47'W) in January 2013 with  
19  
20 a hand-nets (Figure S1 and S2 in Additional file 1). Water temperatures were  $1.6 \pm 0.8^\circ\text{C}$  during  
21  
22 this month. High-molecular-weight genomic DNA from pooled *T. kingsejongensis* was  
23  
24 extracted using the DNeasy Blood & Tissue Kit (Qiagen). For Illumina Miseq sequencing, four  
25  
26 library types were constructed with 350, 400, 450, and 500 bp for paired-end libraries, and 3  
27  
28 kb and 8 kb for mate-pair libraries, prepared using the standard Illumina sample preparation  
29  
30 methods (Table S1 in Additional file 2). All sequencing processes were performed according  
31  
32 to the manufacturer's instructions (Illumina).  
33  
34  
35  
36  
37  
38  
39  
40  
41

### 42 43 **Genome assembly**

44  
45 First, assemblies were performed using a Celera Assembler with Illumina short reads  
46  
47 [35]. Prior to assembly, Illumina reads were trimmed using the FASTX-Toolkit  
48  
49 ([http://hannonlab.cshl.edu/fastx\\_toolkit](http://hannonlab.cshl.edu/fastx_toolkit)) with parameters -t 20, -l 70 and -Q 33, after which a  
50  
51 paired sequence from trimmed Illumina reads was selected. Finally, trimmed Illumina reads  
52  
53 with 65-fold coverage (insert sizes 350, 400, 450, and 500 bp) were obtained and converted to  
54  
55 the FRG file format (required by the Celera assembler) using FastqToCA. Assembly was  
56  
57  
58  
59  
60  
61  
62  
63  
64  
65

1 performed on a 96-processor workstation with Intel Xeon X7460 2.66 GHz processors and 1  
2  
3 terabyte RAM with the following parameters: overlapper = ovl, unitigger = bogart,  
4  
5 utgGraphErrorRate = 0.03, utgGraphErrorLimit = 2.5, utgMergeErrorRate = 0.030,  
6  
7 utgMergeErrorLimit = 3.25, ovlErrorRate = 0.1, cnsErrorRate = 0.1, cgwErrorRate = 0.1,  
8  
9 merSize = 22, and doOverlapBasedTrimming = 1. The initial Celera assembly had a total size  
10  
11 of 305 Mb, N50 contig size of 17,566 bp, and max contig size of 349.5 kb. Scaffolding was  
12  
13 completed using the software SSPACE 2.0 scaffolder using mate-paired data {Boetzer, 2011  
14  
15 #2344}. Subsequently, we closed gaps using Gapfiller Ver.1.9 software with 65× trimmed  
16  
17 Illumina reads with default settings [36]. The final result included a total of 11,558 scaffolds  
18  
19 (295 Gb in length) with 10 Mb gaps having an N50 length of 159 kb and a max length of 3.4  
20  
21 Mb.  
22  
23  
24  
25  
26  
27  
28

## 29 **Annotation**

30  
31 We used MAKER for genome annotation [37]. MAKER is a portable and easily  
32  
33 configurable genome annotation pipeline. MAKER first identified repetitive elements using  
34  
35 RepeatMasker [38]. This masked genome sequence was used for *ab initio* gene prediction with  
36  
37 SNAP software [39], after which alignment of expressed sequence tags with BLASTn and  
38  
39 protein information from tBLASTx were included. We used the *de novo* repeat library of *T.*  
40  
41 *kingsejongensis* from RepeatModeler for RepeatMasker; proteins from five species with data  
42  
43 from *D. melanogaster*, *D. pulex*, *T. japonicus*, and *Tigriopus californicus* were included in the  
44  
45 analysis. RNA-seq-based gene prediction was performed by aligning all RNA-seq data against  
46  
47 the assembled genome using TopHat [40], and Cufflinks [41] was used to predict cDNAs from  
48  
49 the resultant data. Next, MAKER polished the alignments using the program Exonerate [42],  
50  
51 which provided integrated information to synthesize SNAP annotation. MAKER then selected  
52  
53 and revised the final gene model considering all information. A total of 12,772 genes were  
54  
55  
56  
57  
58  
59  
60  
61  
62  
63  
64  
65

1 predicted using MAKER in *T. kingsejongensis* (Table S3-S7 in Additional file 2). Annotated  
2  
3 genes contained an average of 4.6 exons, with an average mRNA length of 1,090 bp.  
4  
5 Additionally, 12,562 of 12,772 genes were assigned preliminary functions based on automated  
6  
7 annotation using Blast2GO (Ver. 2.6.0) [43] (Figure S3 and S4 in Additional file 1). The  
8  
9 Infernal software package (Ver. 1.1) [44] and covariance models (CMs) from the Rfam  
10  
11 database [45] were used to identify other non-coding RNAs in the *T. kingsejongensis* scaffold.  
12  
13 We identified putative tRNA genes using tRNAscan-SE [46]. tRNAscan-SE uses a covariance  
14  
15 model (CM) that scores candidates based on their sequence and predicted secondary structures.  
16  
17  
18  
19  
20  
21

## 22 **Gene families**

23  
24

25 The orthologous groups were identified from 11 species (*T. kingsejongensis*, *Aedes*  
26  
27 *aegypti*, *D. melanogaster*, *Ixodes scapularis*, *M. martensii*, *Strigamia martima*, *Tetranychus*  
28  
29 *urticae*, *D. pulex*, *Homo sapiens*, *Ciona intestinalis*, and *Caenorhabditis elegans*) (Table S10  
30  
31 in Additional file 2) using OrthoMCL [47] with standard parameters and options, and transcript  
32  
33 variants other than the longest translation forms were removed. For *T. kingsejongensis*, the  
34  
35 coding sequence from the MAKER annotation pipeline was used. The 1:1:1 single-copy  
36  
37 orthologous genes were subjected to phylogenetic construction and divergence time estimation.  
38  
39 Protein-coding genes were aligned using PRANK with the codon alignment option [48], and  
40  
41 poorly aligned sequences with gaps were removed using Gblock under the codon model [49].  
42  
43 We constructed a maximum-likelihood phylogenetic tree using RAxML with 1,000 bootstrap  
44  
45 values [50] and calibrated the divergence time between species with TimeTree [51]. Finally,  
46  
47 the average gene gain/loss rate along the given phylogeny was identified using the program  
48  
49 CAFÉ 3.1 [52].  
50  
51  
52  
53  
54  
55  
56  
57  
58  
59  
60  
61  
62  
63  
64  
65

## Evolutionary analysis

To estimate  $dN$ ,  $dS$ ,  $w$ , and lineage-specific PSGs in *T. kingsejongensis* and *T. japonicus*, protein-coding genes from *T. japonicus* (Table S24 in Additional file 2) were added to define orthologous gene families among the four species (*T. kingsejongensis*, *T. japonicus*, *D. pulex*, and *D. melanogaster*) using the program OrthoMCL with the same conditions previously described. We identified 2,937 orthologous groups shared by all four species, and single-copy gene families were used to construct a phylogenetic tree and estimate the time since divergence using the same methods described above. Each of the identified orthologous genes was aligned using the PRANK, and poorly aligned sequences with gaps were removed using Gblock. Alignments showing less than 40% identity and genes shorter than 150 bp were eliminated in subsequent procedures. The values of  $dN$ ,  $dS$  and  $w$  were estimated from each gene using the Codeml program implemented in the PAML package with the free-ratio model [53] under F3X4 codon frequencies, and orthologs with  $w \leq 5$  and  $dS \leq 3$  were retained [54]. To examine the accelerated nonsynonymous divergence in either *T. kingsejongensis* or *T. japonicus* lineage, a binomial test [55] was used to determine GO categories with at least 20 orthologous genes. To define PSGs in *T. kingsejongensis* and *T. japonicus*, we applied basic and branch-site models, and Likelihood Ratio Tests (LRTs) were used to remove genes under relaxation of selective pressure. To investigate which functional categories and pathways were enriched in the PSGs, we performed DAVID Functional Annotation [56] with Fisher's exact test (cutoff:  $P \leq 0.05$ ).

## Gene expression under temperature stress

*Tigriopus kingsejongensis* were captured at the King Sejong Station (62°14'S, 58°47'W) and acclimated in large tanks with circulating fresh sea water at  $4.0 \pm 0.2^\circ\text{C}$  for at least 7 days prior to experiments. We prepared two other large tanks at  $4^\circ\text{C}$  and  $15^\circ\text{C}$  for control

1 and heat stress, respectively. After acclimation, two groups of 20 specimens each of *T.*  
2  
3 *kingsejongensis* were collected at 5 days after culture. For RNA-seq experiments, we prepared  
4  
5 mRNA from each sample. Sequencing was performed with Illumina Miseq, and generated  
6  
7 reads were trimmed to ~30 bases in length and ~20 in base quality (Table S6 in Additional file  
8  
9 2). Trimmed reads of each tissue were mapped to the annotated scaffold of the *T.*  
10  
11 *kingsejongensis* genome. Fragments per kilobase of exon per million fragments mapped  
12  
13 (FPKM) values and fold changes in expression were calculated for each gene in each sample  
14  
15  
16 with a significance threshold of  $P \leq 0.05$  using CLC Genomics Workbench (Ver. 8.0).  
17  
18  
19  
20  
21

### 22 **RNA-seq analysis of *T. japonicus***

23  
24  
25 *Tigriopus japonicus* experiments were carried out under the same conditions as  
26  
27 described above. The *de novo* transcriptome assembly was performed with CLC Genomics  
28  
29 Workbench, setting the minimum allowed contig length to 200 nucleotides. The assembly  
30  
31 process generated 40,172 contigs with a max length of 23,942 bp and an N50 value of 1,093  
32  
33 bp. These generated contigs were used as reference sequences for mapping of trimmed reads,  
34  
35 and fold changes in expression for each gene were calculated with a significance threshold of  
36  
37  $P \leq 0.05$  using CLC Genomics Workbench (Table S24 in Additional file 2).  
38  
39  
40  
41  
42  
43  
44  
45  
46  
47  
48  
49  
50  
51  
52  
53  
54  
55  
56  
57  
58  
59  
60  
61  
62  
63  
64  
65

## Availability of supporting data

The data for *T. kingsejongensis* genome and transcriptome has been deposited in the SRA as BioProject PRJNA307207 and PRJNA307513, respectively.

## List of abbreviations

facilitated trehalose transporter genes, *Tret*; *Tret* genes in Antarctic *Tigriopus*, *TkTret*; and simple sequence repeats, SSRs; Transposable elements, TEs; CEGMA, Core Eukaryotic Genes Mapping Approach; Gene ontology, GO; nonsynonymous mutations, *dN*; synonymous mutations, *dS*; average *dN/dS* ratio, *w*; positively selected genes, PSGs; oxidative phosphorylation, OxPhos; adenosine triphosphate, ATP; catalytic F1 ATP synthase subunit alpha, *ATP5A*; ubiquinol-cytochrome c reductase core protein, *UQCRC1*; electron transfer flavoprotein alpha subunit, *ETF*A; covariance models, CMs; Likelihood Ratio Tests, LRTs; Fragments per kilobase of exon per million fragments mapped values, FPKM

## Competing interests

The authors declare no competing interests.

## Funding

This work was supported by an Antarctic organisms: Cold-adaptation mechanism and its application grant (PE16070) and the basic research program (PE14260) funded by the Korea Polar Research Institute (KOPRI).

## Author contributions

H.P., Sanghee Kim and H.W.K. conceived and designed experiments and analyses; Seunghyun Kang, D.-H.A., S.G.L., S.C.S., J.L., G.S.M. and H.L. performed experiments and conducted bioinformatics. Seunghyun Kang, H.W.K., Sanghee Kim and H.P. wrote the paper.

## Acknowledgements

We would like to thank Joseph A. Covi for comments and discussion.



## References

1. Huys R, Boxshall GA: *Copepod evolution*. Ray Society; 1991.
2. Humes AG: **How many copepods?** *Hydrobiologia* 1994, **292**:1-7.
3. Wells P, Persoone G, Jaspers E, C. C: *Marine ecotoxicological tests with zooplankton*. In: Persoone, G., Jaspers, E., Claus, C. (Eds.), *Ecotoxicological Testing for the Marine Environment*. Inst. Mar. Sci. Res., Bredene; 1984.
4. Ruppert E, Fox R, Barnes R: **Invertebrate Zoology, A Functional Evolutionary Approach**. Brooks/Cole-Thomson Learning, Belmont, CA 2003.
5. Goolish E, Burton R: **Energetics of osmoregulation in an intertidal copepod: Effects of anoxia and lipid reserves on the pattern of free amino accumulation**. *Funct Ecol* 1989:81-89.
6. Lazzaretto I, Libertini A: **Karyological comparison among different Mediterranean populations of the genus *Tigriopus* (Copepoda Harpacticoida)**. *Boll Zool* 2009, **53**:197-201.
7. Davenport J, Barnett P, McAllen R: **Environmental tolerances of three species of the harpacticoid copepod genus *Tigriopus***. *J Mar Biol Assoc UK* 1997, **77**:3-16.
8. Raisuddin S, Kwok KW, Leung KM, Schlenk D, Lee J-S: **The copepod *Tigriopus*: A promising marine model organism for ecotoxicology and environmental genomics**. *Aquat Toxicol* 2007, **83**:161-173.
9. Thorne MAS, Kagoshima H, Clark MS, Marshall CJ, Wharton DA: **Molecular analysis of the cold tolerant Antarctic Nematode, *Panagrolaimus davidi***. *PLOS one* 2014, **9**:e104526.
10. Everatta MJ, Worlandb MR, Balea JS, Conveyb P, Hayward SAL: **Pre-adapted to the maritime Antarctic? – Rapid cold hardening of the midge, *Eretmoptera murphyi***.

- 1 *J Insect Physiol* 2012, **58**:1104–1111.
- 2
- 3
- 4 11. Bromwich DH, Nicolas JP, Monaghan AJ, Lazzara MA, Keller LM, Weidner GA,
- 5
- 6 Wilson AB: **Central West Antarctica among the most rapidly warming regions on**
- 7
- 8 **Earth.** *Nature Geoscience* 2013, **6**:139-145.
- 9
- 10
- 11 12. Park E-O, Lee S, Cho M, Yoon SH, Lee Y, Lee W: **A new species of the genus**
- 12
- 13 ***Tigriopus* (Copepoda: Harpacticoida: Harpacticidae) from Antarctica.** *Proc Biol*
- 14
- 15 *Soc Wash* 2014, **127**:138-154.
- 16
- 17
- 18 13. Birkenmajer K: **Geology of Admiralty Bay, King George Island (South Shetland**
- 19
- 20 **Islands). An outline.** *Pol Polar Res* 1980, **1**:29-54.
- 21
- 22
- 23 14. Crowe JH, Carpenter JF, Crowe LM: **The role of vitrification in anhydrobiosis.** *Annu*
- 24
- 25 *Rev Physiol* 1998, **60**:73-103.
- 26
- 27
- 28 15. Arrese EL, Soulages JL: **Insect fat body: energy, metabolism, and regulation.** *Annu*
- 29
- 30 *Rev Entomol* 2010, **55**:207.
- 31
- 32
- 33 16. Benoit JB, Lopez-Martinez G, Elnitsky MA, Lee RE, Denlinger DL: **Dehydration-**
- 34
- 35 **induced cross tolerance of *Belgica antarctica* larvae to cold and heat is facilitated**
- 36
- 37 **by trehalose accumulation.** *Comparative Biochemistry and Physiology Part A:*
- 38
- 39 *Molecular & Integrative Physiology* 2009, **152**:518-523.
- 40
- 41
- 42 17. Boucher P, Ditlecadet D, Dubé C, Dufresne F: **Unusual duplication of the insulin-**
- 43
- 44 **like receptor in the crustacean *Daphnia pulex*.** *BMC Evol Biol* 2010, **10**:305.
- 45
- 46
- 47 18. Baldwin WS, Marko PB, Nelson DR: **The cytochrome P450 (CYP) gene superfamily**
- 48
- 49 **in *Daphnia pulex*.** *BMC Genomics* 2009, **10**:169.
- 50
- 51
- 52 19. Zeis B, Lamkemeyer T, Paul RJ, Nunes F, Schwerin S, Koch M, Schütz W, Madlung
- 53
- 54 J, Fladerer C, Pirow R: **Acclimatory responses of the *Daphnia pulex* proteome to**
- 55 **environmental changes. I. Chronic exposure to hypoxia affects the oxygen**
- 56 **transport system and carbohydrate metabolism.** *BMC Physiol* 2009, **9**:7.
- 57
- 58
- 59
- 60
- 61
- 62
- 63
- 64
- 65

- 1  
2  
3  
4  
5  
6  
7  
8  
9  
10  
11  
12  
13  
14  
15  
16  
17  
18  
19  
20  
21  
22  
23  
24  
25  
26  
27  
28  
29  
30  
31  
32  
33  
34  
35  
36  
37  
38  
39  
40  
41  
42  
43  
44  
45  
46  
47  
48  
49  
50  
51  
52  
53  
54  
55  
56  
57  
58  
59  
60  
61  
62  
63  
64  
65
20. Sturm A, Cunningham P, Dean M: **The ABC transporter gene family of *Daphnia pulex*. *BMC Genomics* 2009, **10**:170.**
  21. Matys V, Kel-Margoulis OV, Fricke E, Liebich I, Land S, Barre-Dirrie A, Reuter I, Chekmenev D, Krull M, Hornischer K: **TRANSFAC® and its module TRANSCompel®: transcriptional gene regulation in eukaryotes. *Nucleic Acids Res* 2006, **34**:D108-D110.**
  22. Tiensuu T, Larsen MK, Vernersson E, Tuck S: ***lin-1* has both positive and negative functions in specifying multiple cell fates induced by Ras/MAP kinase signaling in *C. elegans*. *Dev Biol* 2005, **286**:338-351.**
  23. Ryan AK, Rosenfeld MG: **POU domain family values: flexibility, partnerships, and developmental codes. *Genes Dev* 1997, **11**:1207-1225.**
  24. Kuo M-H, Grayhack E: **A library of yeast genomic MCM1 binding sites contains genes involved in cell cycle control, cell wall and membrane structure, and metabolism. *Mol Cell Biol* 1994, **14**:348-359.**
  25. Kikawada T, Minakawa N, Watanabe M, Okuda T: **Factors inducing successful anhydrobiosis in the African chironomid *Polypedium vanderplanki*: significance of the larval tubular nest. *Integr Comp Biol* 2005, **45**:710-714.**
  26. Kikawada T, Saito A, Kanamori Y, Nakahara Y, Iwata K-i, Tanaka D, Watanabe M, Okuda T: **Trehalose transporter 1, a facilitated and high-capacity trehalose transporter, allows exogenous trehalose uptake into cells. *Proc Natl Acad Sci USA* 2007, **104**:11585-11590.**
  27. Martinez-Cruz O, Muhlia-Almazan A, Sanchez-Paz A, Garcia-Carreño F, Jimenez-Gutierrez L, Toro MdlANd: ***Invertebrates mitochondrial function and energetic challenges*. INTECH Open Access Publisher; 2012.**
  28. Schapira AH: **Mitochondrial diseases. *The Lancet* 2012, **379**:1825-1834.**

- 1  
2  
3  
4  
5  
6  
7  
8  
9  
10  
11  
12  
13  
14  
15  
16  
17  
18  
19  
20  
21  
22  
23  
24  
25  
26  
27  
28  
29  
30  
31  
32  
33  
34  
35  
36  
37  
38  
39  
40  
41  
42  
43  
44  
45  
46  
47  
48  
49  
50  
51  
52  
53  
54  
55  
56  
57  
58  
59  
60  
61  
62  
63  
64  
65
29. Tuppen HA, Blakely EL, Turnbull DM, Taylor RW: **Mitochondrial DNA mutations and human disease.** *Biochimica et Biophysica Acta (BBA)-Bioenergetics* 2010, **1797**:113-128.
  30. Johannsen DL, Ravussin E: **The role of mitochondria in health and disease.** *Curr Opin Pharm* 2009, **9**:780-786.
  31. Toms JD, Eggert LS, Arendt WJ, Faaborg J: **A genetic polymorphism in the sex-linked *ATP5A1* gene is associated with individual fitness in Ovenbirds (*Seiurus aurocapilla*).** *Ecology and evolution* 2012, **2**:1312-1318.
  32. Kunej T, Wang Z, Michal JJ, Daniels TF, Magnuson NS, Jiang Z: **Functional *UQCRC1* polymorphisms affect promoter activity and body lipid accumulation.** *Obesity* 2007, **15**:2896-2901.
  33. Henriques BJ, Fisher MT, Bross P, Gomes CM: **A polymorphic position in electron transfer flavoprotein modulates kinetic stability as evidenced by thermal stress.** *FEBS Lett* 2011, **585**:505-510.
  34. Bross P, Pedersen P, Winter V, Nyholm M, Johansen BN, Olsen RKJ, Corydon MJ, Andresen BS, Eiberg H, Kølvrå S, Gregersen N: **A polymorphic variant in the human electron transfer flavoprotein  $\alpha$ -chain ( $\alpha$ -T171) displays decreased thermal stability and is overrepresented in very-long-chain acyl-coA dehydrogenase-deficient patients with mild childhood presentation.** *Mol Genet Metab* 1999, **67**:138-147.
  35. Myers EW, Sutton GG, Delcher AL, Dew IM, Fasulo DP, Flanigan MJ, Kravitz SA, Mobarry CM, Reinert KH, Remington KA, et al: **A whole-genome assembly of *Drosophila*.** *Science* 2000, **287**:2196-2204.
  36. Nadalin F, Vezzi F, Policriti A: **GapFiller: a *de novo* assembly approach to fill the gap within paired reads.** *BMC Bioinformatics* 2012, **13**:S8.

- 1  
2  
3  
4  
5  
6  
7  
8  
9  
10  
11  
12  
13  
14  
15  
16  
17  
18  
19  
20  
21  
22  
23  
24  
25  
26  
27  
28  
29  
30  
31  
32  
33  
34  
35  
36  
37  
38  
39  
40  
41  
42  
43  
44  
45  
46  
47  
48  
49  
50  
51  
52  
53  
54  
55  
56  
57  
58  
59  
60  
61  
62  
63  
64  
65
37. Holt C, Yandell M: **MAKER2: an annotation pipeline and genome-database management tool for second-generation genome projects.** *BMC Bioinformatics* 2011, **12**:491.
  38. Smit AFA HR, Green, P.: **RepeatMasker Open-3.0. 1996-2004** (<http://www.RepeatMasker.org>).
  39. Korf I: **Gene finding in novel genomes.** *BMC Bioinformatics* 2004, **5**:59.
  40. Trapnell C, Pachter L, Salzberg SL: **TopHat: discovering splice junctions with RNA-Seq.** *Bioinformatics* 2009, **25**:1105-1111.
  41. Trapnell C, Williams BA, Pertea G, Mortazavi A, Kwan G, van Baren MJ, Salzberg SL, Wold BJ, Pachter L: **Transcript assembly and quantification by RNA-Seq reveals unannotated transcripts and isoform switching during cell differentiation.** *Nat Biotech* 2010, **28**:511-515.
  42. Slater GS, Birney E: **Automated generation of heuristics for biological sequence comparison.** *BMC Bioinformatics* 2005, **6**:31.
  43. Conesa A, Gotz S, Garcia-Gomez JM, Terol J, Talon M, Robles M: **Blast2GO: a universal tool for annotation, visualization and analysis in functional genomics research.** *Bioinformatics* 2005, **21**:3674-3676.
  44. Nawrocki EP, Kolbe DL, Eddy SR: **Infernal 1.0: inference of RNA alignments.** *Bioinformatics* 2009, **25**:1335-1337.
  45. Gardner PP, Daub J, Tate J, Moore BL, Osuch IH, Griffiths-Jones S, Finn RD, Nawrocki EP, Kolbe DL, Eddy SR, Bateman A: **Rfam: Wikipedia, clans and the "decimal" release.** *Nucleic Acids Res* 2011, **39**:D141-145.
  46. Lowe TM, Eddy SR: **tRNAscan-SE: a program for improved detection of transfer RNA genes in genomic sequence.** *Nucleic Acids Res* 1997, **25**:955-964.
  47. Li L, Stoeckert CJ, Roos DS: **OrthoMCL: identification of ortholog groups for**

- 1            **eukaryotic genomes.** *Genome Res* 2003, **13**:2178-2189.
- 2
- 3
- 4    48.    Löytynoja A, Goldman N: **An algorithm for progressive multiple alignment of**
- 5            **sequences with insertions.** *Proc Natl Acad Sci U S A* 2005, **102**:10557-10562.
- 6
- 7
- 8    49.    Castresana J: **Selection of conserved blocks from multiple alignments for their use**
- 9            **in phylogenetic analysis.** *Mol Biol Evol* 2000, **17**:540-552.
- 10
- 11
- 12
- 13    50.    Stamatakis A: **RAxML version 8: a tool for phylogenetic analysis and post-analysis**
- 14            **of large phylogenies.** *Bioinformatics* 2014, **30**:1312-1313.
- 15
- 16
- 17
- 18    51.    Hedges SB, Dudley J, Kumar S: **TimeTree: a public knowledge-base of divergence**
- 19            **times among organisms.** *Bioinformatics* 2006, **22**:2971-2972.
- 20
- 21
- 22
- 23    52.    Han MV, Thomas GW, Lugo-Martinez J, Hahn MW: **Estimating gene gain and loss**
- 24            **rates in the presence of error in genome assembly and annotation using CAFE 3.**
- 25            *Mol Biol Evol* 2013, **30**:1987-1997.
- 26
- 27
- 28
- 29
- 30    53.    Yang Z: **PAML 4: phylogenetic analysis by maximum likelihood.** *Mol Biol Evol*
- 31            2007, **24**:1586-1591.
- 32
- 33
- 34
- 35    54.    Zhang G, Li C, Li Q, Li B, Larkin DM, Lee C, Storz JF, Antunes A, Greenwold MJ,
- 36            Meredith RW: **Comparative genomics reveals insights into avian genome evolution**
- 37            **and adaptation.** *Science* 2014, **346**:1311-1320.
- 38
- 39
- 40
- 41
- 42    55.    Consortium TCSaA: **Initial sequence of the chimpanzee genome and comparison**
- 43            **with the human genome.** *Nature* 2005, **437**:69-87.
- 44
- 45
- 46
- 47    56.    Huang DW, Sherman BT, Lempicki RA: **Systematic and integrative analysis of large**
- 48            **gene lists using DAVID bioinformatics resources.** *Nature protocols* 2008, **4**:44-57.
- 49
- 50
- 51
- 52
- 53
- 54
- 55
- 56
- 57
- 58
- 59
- 60
- 61
- 62
- 63
- 64
- 65

1 **Figure legends**  
2  
3

4 **Figure 1 Comparative genome analyses of the *T. kingsejongensis* genome.** (A) Venn  
5 diagram of orthologous gene clusters between the four arthropod lineages. (B) Gene family  
6 gain-and-loss analysis. The number of gained gene families (red), lost gene families (blue) and  
7 orphan gene families (black) are indicated for each species. Time lines specify divergence  
8 times between the lineages.  
9

10 **Figure 2 *Tigriopus kingsejongensis*-specific adaptive evolution.** (A) Global mean *w*  
11 distribution by GO categories of *T. kingsejongensis* and *T. japonicus*. GO categories showing  
12 supposedly accelerated nonsynonymous divergence (binomial test, test statistic < 0.05) in *T.*  
13 *kingsejongensis* and *T. japonicus* are colored in red and blue, respectively. (B) A total of seven  
14 enzyme-coding genes were PSGs involved in the four metabolic pathways (oval frame) of *T.*  
15 *kingsejongensis*: energy (purple), nucleotide (red), lipid (green), and carbohydrate (blue)  
16 metabolic pathways. The three genes belonging to the oxidative phosphorylation pathway  
17 (KEGG pathway map00190) (rectangular frame) are presented below the enzymes involved.  
18 Solid lines indicate direct processes and dashed lines indicate that more than one step is  
19 involved in a process.  
20  
21  
22  
23  
24  
25  
26  
27  
28  
29  
30  
31  
32  
33  
34  
35  
36  
37  
38  
39  
40

41 **Figure 3 Comparing gene expression at different temperatures.** (A) RNA-seq analysis of  
42 upregulated *T. kingsejongensis* genes at 4°C and 15°C. (B) Transcription factors of four  
43 upregulated *TkTret* genes, and comparisons of transcription factor frequency between 2,276  
44 upregulated genes at 4°C and the entire gene set. (C) Structure of transcription binding motifs  
45 of four upregulated *TkTret* genes. (D) Comparison of expression change for *Tret* transcription  
46 factors at 4°C and 15°C.  
47  
48  
49  
50  
51  
52  
53  
54  
55  
56  
57  
58  
59  
60  
61  
62  
63  
64  
65

A

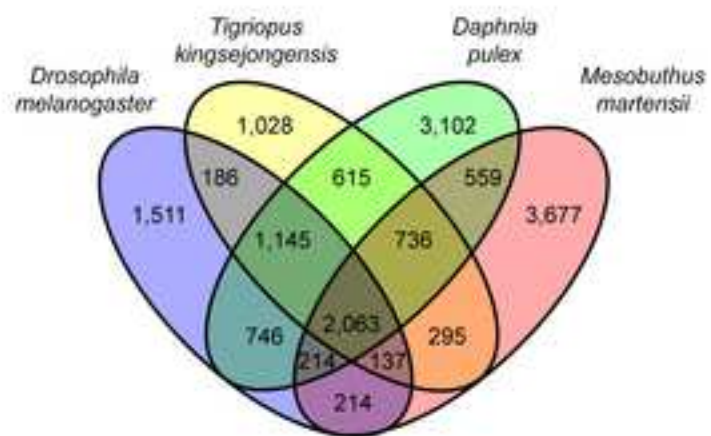

B

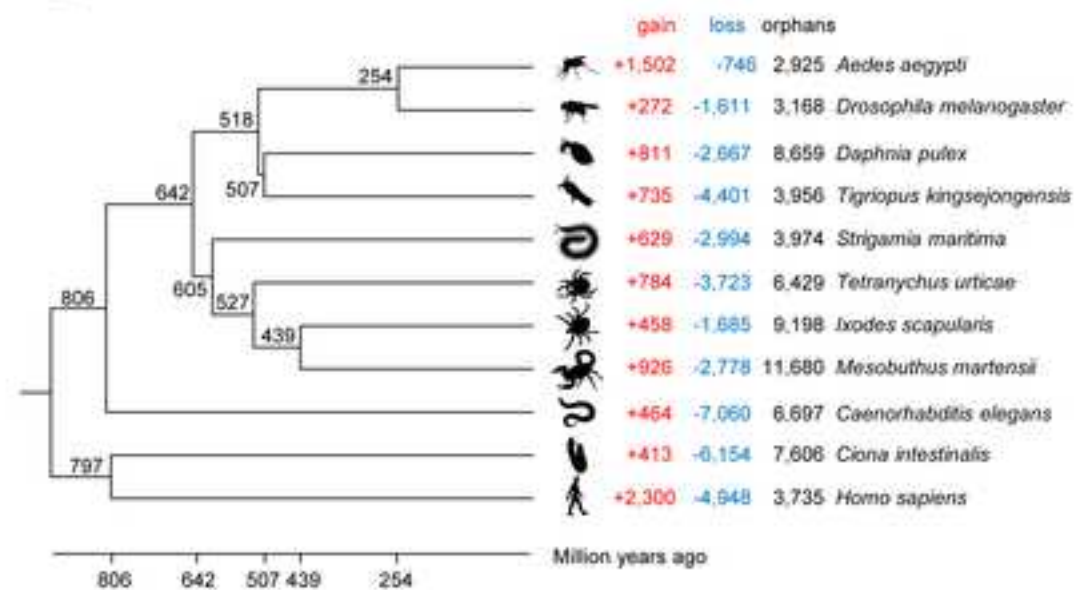



A

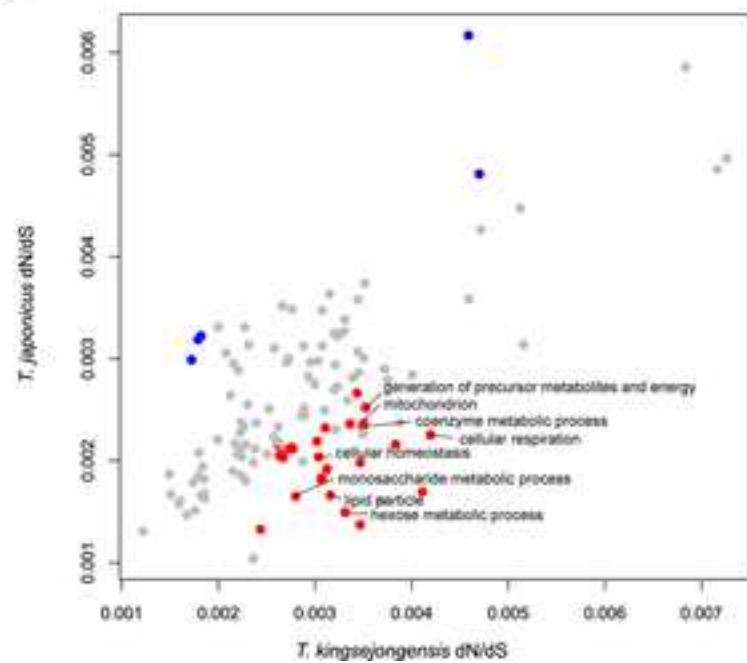

B

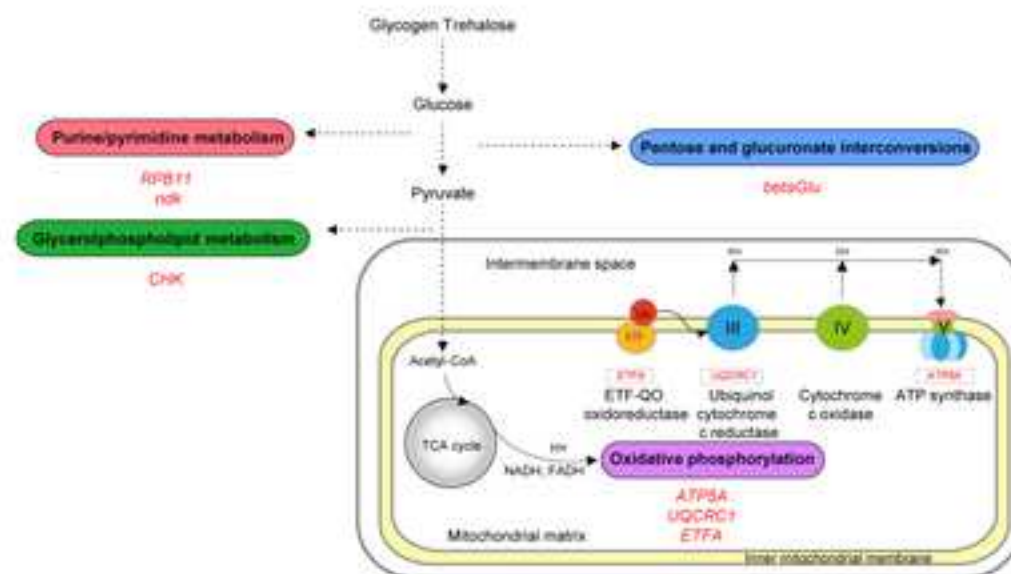

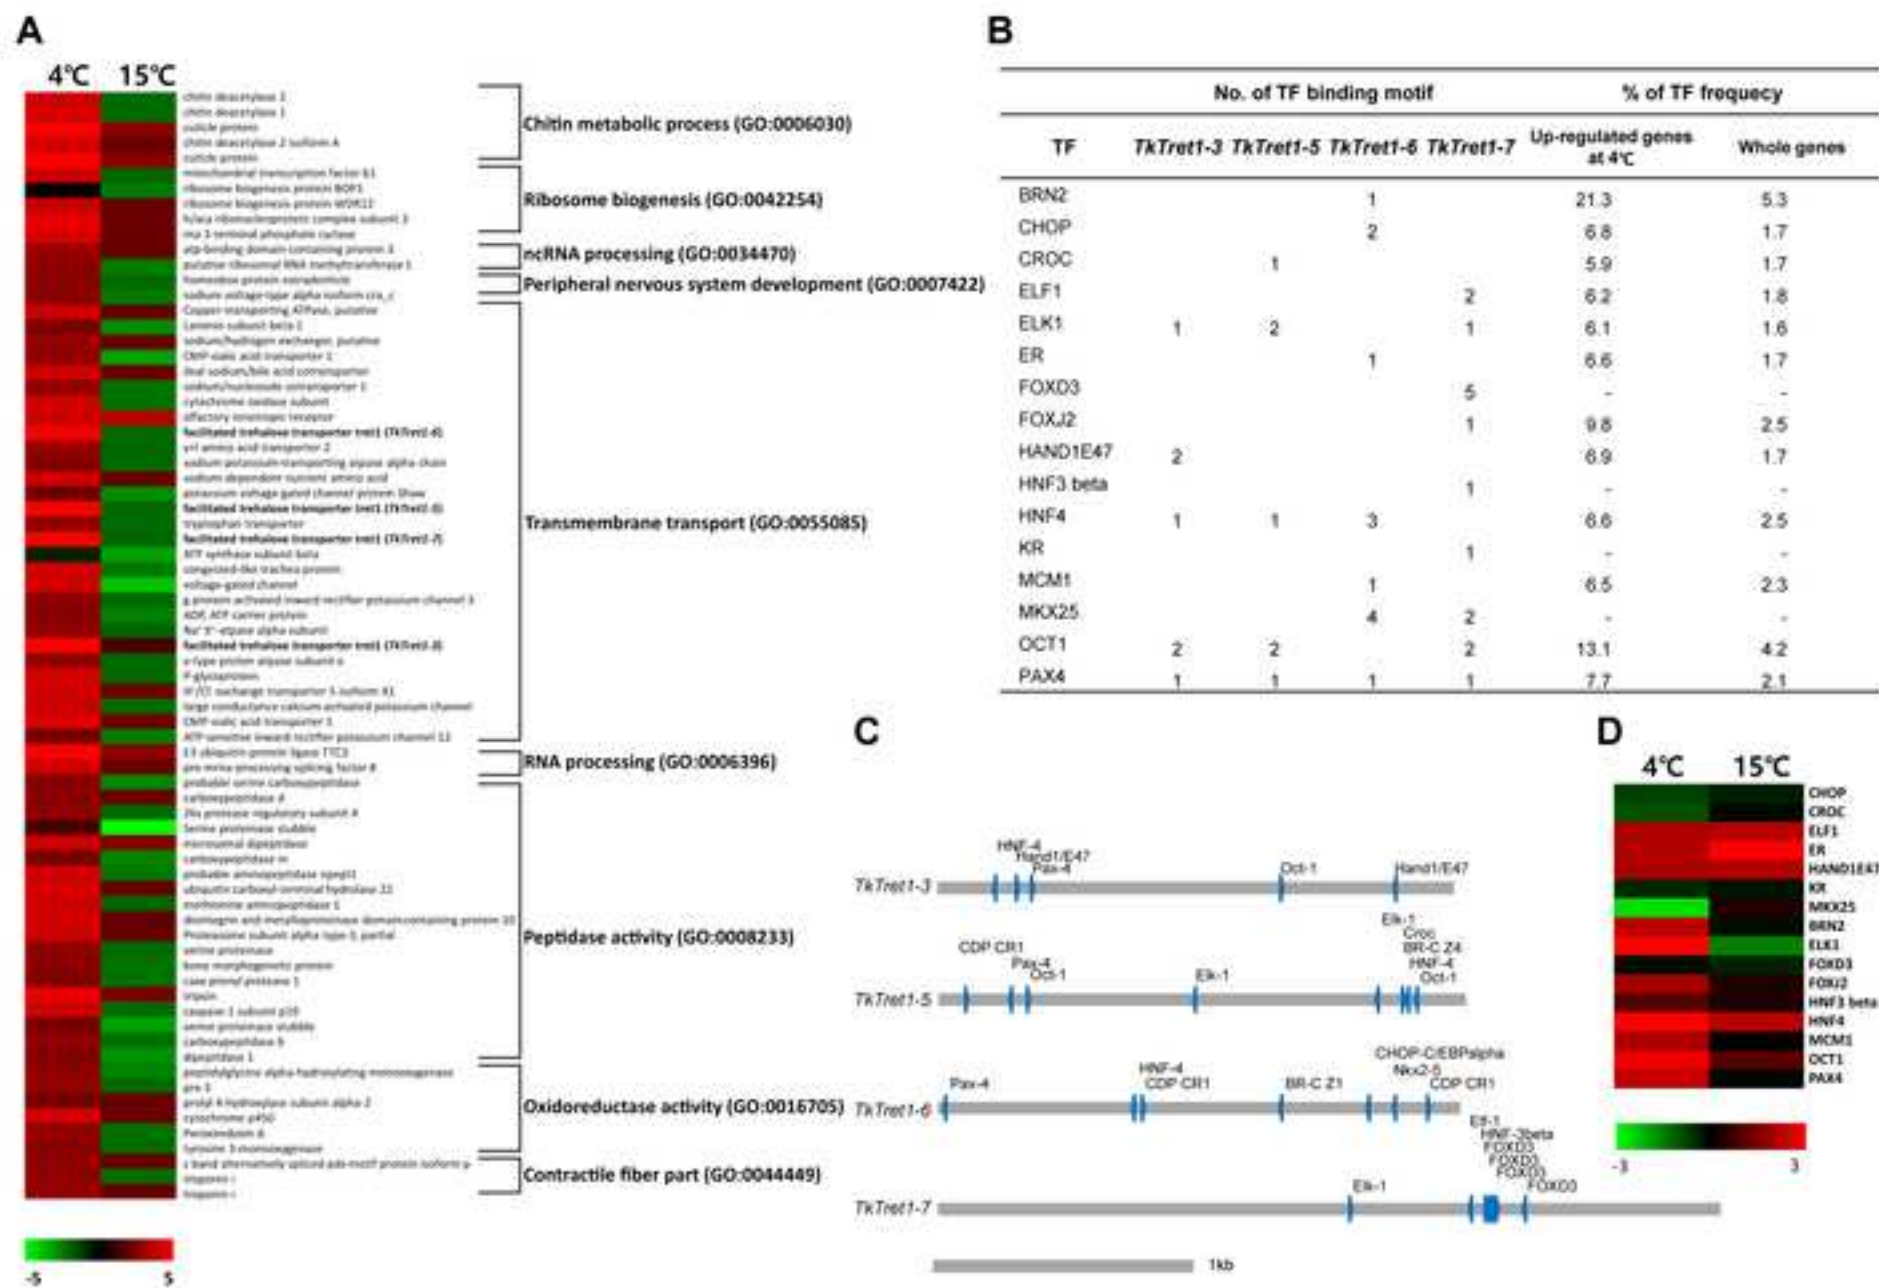

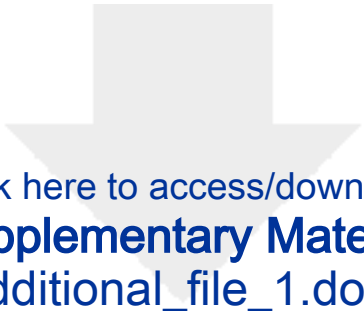

Click here to access/download  
**Supplementary Material**  
Additional\_file\_1.docx



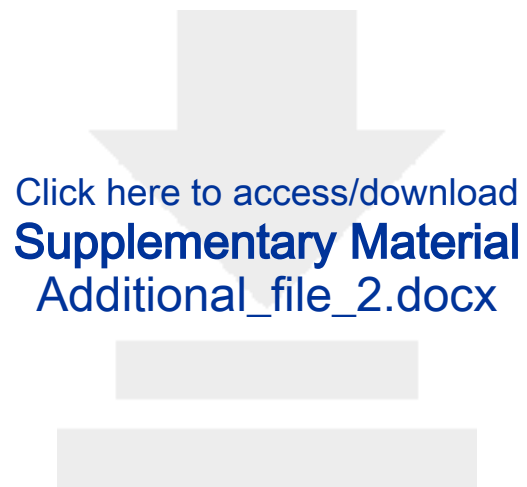

Click here to access/download  
**Supplementary Material**  
Additional\_file\_2.docx
