# Supplementary material for: The genome of the Antarctic-endemic copepod, Tigriopus kingsejongensis
Source: PubMed Central journal article supplement (PMC5467011; doi:10.1093/gigascience/giw010), 2017-01-07
Supplement: giw010_Response_to_Review_Comments_Revision_3.pdf [file giw010_Response_to_Review_Comments_Revision_3.pdf]

Dear Hans,

We have tried to address all the comments and we have uploaded both clean and comment version of manuscripts.

Thanks and best regards.
